# Supplementary material for: Urinary Metabolomics for the Prediction of Radiation-Induced Cardiac Dysfunction
Source: MDPI journal article supplement (doi:10.3390/metabo13040525), 2023-04-06
Supplement: s1 [file s1]

## **Urinary metabolites are predictive of radiation induced cardiac dysfunction in mice**

<sup>\$</sup>Yaoxiang Li,<sup>1</sup> <sup>\$</sup>Shivani Bansal,<sup>1</sup> Vijayalakshmi Sridharan,<sup>2</sup> Michael Girgis,<sup>1</sup> Sunil Bansal,<sup>1</sup> Meth Jayatilake,<sup>1</sup> Jose A. Fernández<sup>3</sup>, John H. Griffin<sup>3</sup>, Marjan Boerma,<sup>2</sup> Amrita K Cheema<sup>1,4\*</sup>

<sup>1</sup>Department of Oncology, Lombardi Comprehensive Cancer Centre, Georgetown University Medical Center, Washington D.C, 20057, USA.

<sup>2</sup>Division of Radiation Health, Department of Pharmaceutical Sciences, 4301 West Markham #522-10, University of Arkansas for Medical Sciences, Little Rock, Arkansas, 72205, USA.

<sup>3</sup>Department of Molecular Medicine, Scripps Research Institute, La Jolla, CA 92037, USA.

<sup>4</sup>Departments of Biochemistry, Molecular and Cellular Biology, Georgetown University Medical Center, Washington D.C, 20057, USA.

<sup>\$</sup>: Both authors contributed equally

\*Correspondence: Amrita K Cheema Professor; Georgetown University Medical Center, GC2 Pre-Clinical Science Building, 3900 Reservoir Road NW Washington DC 20057; Phone (202) 687-2756; Fax (202) 687-8860; e-mail: akc27@georgetown.edu

Supplementary Table S1. List of dysregulated metabolites following exposure to 9.5 Gy of Gamma-radiation, 24 h, 1 week, 1 month, 3 month and 6 months post-irradiation.

|  | name                           | 9.5Gy / 0.0Gy |          |         |        | 9.5Gy / 0.0Gy |          |         |         | 9.5Gy / 0.0Gy |        |          |         | 9.5Gy / 0.0Gy |     |        |          | 9.5Gy / 0.0Gy |         |    |        |          |          |         |   |        |
|--|--------------------------------|---------------|----------|---------|--------|---------------|----------|---------|---------|---------------|--------|----------|---------|---------------|-----|--------|----------|---------------|---------|----|--------|----------|----------|---------|---|--------|
|  |                                | 24h           |          |         |        | 1wk           |          |         |         | 1mo           |        |          |         | 3mo           |     |        |          | 6mo           |         |    |        |          |          |         |   |        |
|  |                                | p-value       | FDR      | FC      | LOG2FC | p-value       | FDR      | FC      | LOG2FC  | p-value       | FDR    | FC       | LOG2FC  | p-value       | FDR | FC     | LOG2FC   | p-value       | FDR     | FC | LOG2FC |          |          |         |   |        |
|  | METHYL PHENYLACETATE_neg_3     | 1.52E-05      | 0.006471 | 0.36516 | ↓      | -1.453        | 0.010049 | 0.28471 | 0.5543  | ↓             | -0.851 | 0.11365  | 0.76666 | 1.5431        | ↑   | 0.6258 | 0.31777  | 0.65459       | 1.4505  | ↑  | 0.5366 | 0.15543  | 0.39557  | 0.87418 | ↓ | -0.194 |
|  | CE204                          | 6.68E-05      | 0.014205 | 2.4885  | ↑      | 1.3153        | 0.005893 | 0.26577 | 1.7554  | ↑             | 0.8118 | 0.60827  | 0.91609 | 0.32993       | ↓   | -1.6   | 0.55675  | 0.81895       | 0.91942 | ↓  | -0.121 | 0.88338  | 0.94759  | 0.91564 | ↓ | -0.127 |
|  | CE226                          | 0.000139      | 0.019712 | 2.1312  | ↑      | 1.0917        | 0.32033  | 0.7222  | 1.3484  | ↑             | 0.4313 | 0.39096  | 0.89952 | 0.55925       | ↓   | -0.838 | 0.001711 | 0.18171       | 2.1944  | ↑  | 1.1338 | 0.11832  | 0.34075  | 1.3832  | ↑ | 0.468  |
|  | CYSTEINE_neg_5                 | 0.000333      | 0.035381 | 2.5263  | ↑      | 1.337         | 0.80777  | 0.9346  | 1.0471  | ↑             | 0.0664 | 0.7155   | 0.92337 | 1.1578        | ↑   | 0.2114 | 0.002319 | 0.18171       | 2.5899  | ↑  | 1.3729 | 0.65851  | 0.83047  | 1.0464  | ↑ | 0.0655 |
|  | XANTHOSINE_neg_1               | 0.000512      | 0.037313 | 2.2773  | ↑      | 1.1873        | 0.098354 | 0.46573 | 1.3964  | ↑             | 0.4817 | 0.26167  | 0.86881 | 1.2117        | ↑   | 0.277  | 0.607    | 0.834         | 0.75255 | ↓  | -0.41  | 0.68022  | 0.83692  | 1.0422  | ↑ | 0.0596 |
|  | TAG567-FA226                   | 0.000527      | 0.037313 | 2.2403  | ↑      | 1.1637        | 0.56746  | 0.81005 | 0.76066 | ↓             | -0.395 | 0.86929  | 0.95219 | 0.67309       | ↓   | -0.571 | 0.22362  | 0.57251       | 0.74352 | ↓  | -0.428 | 0.82413  | 0.92273  | 0.77271 | ↓ | -0.372 |
|  | TAG501-FA181                   | 0.001294      | 0.067873 | 1.2809  | ↑      | 0.3571        | 0.3286   | 0.72737 | 0.90404 | ↓             | -0.146 | 0.69491  | 0.91799 | 0.9504        | ↓   | -0.073 | 0.3681   | 0.70986       | 0.90983 | ↓  | -0.136 | 0.01093  | 0.085834 | 0.77433 | ↓ | -0.369 |
|  | PYROPHOSPHATE_neg_3            | 0.001347      | 0.067873 | 3.072   | ↑      | 1.6192        | 0.25119  | 0.67141 | 2.8461  | ↑             | 1.509  | 0.084168 | 0.67934 | 2.0401        | ↑   | 1.0286 | 0.94052  | 0.98253       | 1.3193  | ↑  | 0.3998 | 0.53954  | 0.74208  | 1.2257  | ↑ | 0.2937 |
|  | NORMETANEPHRINE_pos_1          | 0.001437      | 0.067873 | 2.2184  | ↑      | 1.1495        | 0.094518 | 0.46158 | 2.1339  | ↑             | 1.0935 | 0.52561  | 0.91257 | 0.89827       | ↓   | -0.155 | 0.28362  | 0.62132       | 1.9391  | ↑  | 0.9554 | 0.58218  | 0.76801  | 1.2425  | ↑ | 0.3132 |
|  | LCER160                        | 0.002228      | 0.091932 | 3.0365  | ↑      | 1.6024        | 0.00331  | 0.26577 | 3.6881  | ↑             | 1.8829 | 0.003756 | 0.38156 | 3.155         | ↑   | 1.6577 | 0.027806 | 0.29511       | 2.133   | ↑  | 1.0929 | 0.092174 | 0.30193  | 1.8541  | ↑ | 0.8907 |
|  | N-ACETYLGUTAMINE_pos_2         | 0.002379      | 0.091932 | 3.507   | ↑      | 1.8102        | 0.32159  | 0.7222  | 0.79744 | ↓             | -0.327 | 0.85769  | 0.9468  | 1.378         | ↑   | 0.4626 | 0.15373  | 0.52981       | 1.5321  | ↑  | 0.6155 | 0.39178  | 0.63311  | 0.99578 | ↓ | -0.006 |
|  | TAG544-FA224                   | 0.003229      | 0.11435  | 1.4483  | ↑      | 0.5344        | 0.2409   | 0.66054 | 1.4613  | ↑             | 0.5472 | 0.79606  | 0.93191 | 0.79835       | ↓   | -0.325 | 0.49788  | 0.78662       | 1.1982  | ↑  | 0.2608 | 0.41962  | 0.66051  | 1.1008  | ↑ | 0.1386 |
|  | TAG525-FA181                   | 0.003554      | 0.11619  | 0.77318 | ↓      | -0.371        | 0.054973 | 0.34545 | 1.1776  | ↑             | 0.2358 | 0.43838  | 0.90445 | 0.87898       | ↓   | -0.186 | 0.20355  | 0.56099       | 0.89871 | ↓  | -0.154 | 0.69195  | 0.84616  | 0.96616 | ↓ | -0.05  |
|  | 3-METHYLAMINO-L-ALANINE_pos_2  | 0.003992      | 0.12119  | 2.543   | ↑      | 1.3465        | 0.3134   | 0.7222  | 1.2643  | ↑             | 0.3384 | 0.11334  | 0.76666 | 0.75902       | ↓   | -0.398 | 0.68372  | 0.85718       | 0.84485 | ↓  | -0.243 | 0.50201  | 0.7049   | 1.3647  | ↑ | 0.4486 |
|  | OROTATE_neg_1                  | 0.005409      | 0.15045  | 2.0278  | ↑      | 1.0199        | 0.3572   | 0.74053 | 0.88827 | ↓             | -0.171 | 0.54617  | 0.91609 | 1.0161        | ↑   | 0.0231 | 0.58733  | 0.82778       | 0.78814 | ↓  | -0.343 | 0.97811  | 0.99159  | 1.4089  | ↑ | 0.4946 |
|  | AMINOADIPATE_pos_1             | 0.005664      | 0.15045  | 1.8557  | ↑      | 0.8919        | 0.30227  | 0.70975 | 0.63051 | ↓             | -0.665 | 0.37599  | 0.89952 | 0.81115       | ↓   | -0.302 | 0.43534  | 0.7494        | 2.1888  | ↑  | 1.1301 | 0.022631 | 0.13547  | 0.75435 | ↓ | -0.407 |
|  | TAG504-FA161                   | 0.006913      | 0.17282  | 0.79947 | ↓      | -0.323        | 0.091123 | 0.45032 | 0.76128 | ↓             | -0.394 | 0.073631 | 0.67934 | 0.72322       | ↓   | -0.468 | 0.19738  | 0.55631       | 0.55407 | ↓  | -0.852 | 0.16913  | 0.40638  | 0.68261 | ↓ | -0.551 |
|  | N-ACETYLMALANINE_neg_1         | 0.007867      | 0.18574  | 2.3326  | ↑      | 1.2219        | 0.31908  | 0.7222  | 1.4373  | ↑             | 0.5234 | 0.296    | 0.8936  | 1.074         | ↑   | 0.103  | 0.94772  | 0.98367       | 0.701   | ↓  | -0.513 | 0.003295 | 0.047473 | 0.62369 | ↓ | -0.681 |
|  | TAG522-FA202                   | 0.008967      | 0.20057  | 1.3924  | ↑      | 0.4776        | 0.40145  | 0.77199 | 1.3638  | ↑             | 0.4476 | 0.46583  | 0.90445 | 0.75419       | ↓   | -0.407 | 0.081061 | 0.38105       | 1.4307  | ↑  | 0.5167 | 0.48852  | 0.69671  | 1.0421  | ↑ | 0.0594 |
|  | BETAINE_pos_2                  | 0.010669      | 0.22672  | 2.7561  | ↑      | 1.4626        | 0.81158  | 0.9346  | 1.0479  | ↑             | 0.0675 | 0.16011  | 0.82488 | 0.68633       | ↓   | -0.543 | 0.75121  | 0.87952       | 0.80671 | ↓  | -0.31  | 0.51243  | 0.70939  | 1.6226  | ↑ | 0.6983 |
|  | TAG545-FA205                   | 0.01197       | 0.2417   | 0.58021 | ↓      | -0.785        | 0.17903  | 0.61799 | 1.2434  | ↑             | 0.3143 | 0.71957  | 0.92392 | 0.94405       | ↓   | -0.083 | 0.6699   | 0.85669       | 0.95736 | ↓  | -0.063 | 0.32918  | 0.58966  | 1.1992  | ↑ | 0.2621 |
|  | PHENYLPROPIOLIC ACID_neg_1     | 0.012512      | 0.2417   | 0.17366 | ↓      | -2.526        | 0.94846  | 0.96204 | 0.7499  | ↓             | -0.415 | 0.23785  | 0.85757 | 0.94538       | ↓   | -0.081 | 0.61029  | 0.834         | 0.7402  | ↓  | -0.434 | 0.032473 | 0.1643   | 0.60914 | ↓ | -0.715 |
|  | ACETYL-COA_pos_1               | 0.015696      | 0.27472  | 2.068   | ↑      | 1.0483        | 0.79595  | 0.9346  | 1.0622  | ↑             | 0.087  | 0.25319  | 0.85757 | 1.6581        | ↑   | 0.7295 | 0.86318  | 0.94947       | 1.2789  | ↑  | 0.3549 | 0.8168   | 0.92273  | 0.92409 | ↓ | -0.114 |
|  | TAG461-FA141                   | 0.015901      | 0.27472  | 1.3787  | ↑      | 0.4633        | 0.26354  | 0.67444 | 0.85035 | ↓             | -0.234 | 0.47133  | 0.90445 | 1.017         | ↑   | 0.0243 | 0.49347  | 0.78255       | 1.0265  | ↑  | 0.0377 | 0.061157 | 0.24233  | 1.3098  | ↑ | 0.3893 |
|  | TAG462-FA182                   | 0.016758      | 0.27472  | 0.86617 | ↓      | -0.207        | 0.2008   | 0.61799 | 1.106   | ↑             | 0.1454 | 0.65165  | 0.91609 | 0.99672       | ↓   | -0.005 | 0.057597 | 0.32639       | 1.1315  | ↑  | 0.1783 | 0.1776   | 0.41934  | 1.0497  | ↑ | 0.07   |
|  | CE182                          | 0.016806      | 0.27472  | 1.3859  | ↑      | 0.4709        | 0.67414  | 0.87102 | 0.56993 | ↓             | -0.811 | 0.64545  | 0.91609 | 0.12007       | ↓   | -3.058 | 0.40255  | 0.73426       | 1.0714  | ↑  | 0.0995 | 0.37903  | 0.62943  | 0.92    | ↓ | -0.12  |
|  | GERANYL-PP_HPO3_neg_2          | 0.017813      | 0.28039  | 1.6907  | ↑      | 0.7577        | 0.67164  | 0.87102 | 1.4295  | ↑             | 0.5156 | 0.5459   | 0.91609 | 1.2701        | ↑   | 0.3449 | 0.71879  | 0.86769       | 0.94814 | ↓  | -0.077 | 0.70365  | 0.84685  | 1.1449  | ↑ | 0.1953 |
|  | INDOLE-3-CARBOXYLIC ACID_pos_3 | 0.018473      | 0.28039  | 3.1949  | ↑      | 1.6758        | 1.14894  | 0.55976 | 1.5667  | ↑             | 0.6478 | 0.9269   | 0.96978 | 1.4151        | ↑   | 0.5009 | 0.62134  | 0.83832       | 1.005   | ↑  | 0.0072 | 0.43074  | 0.66812  | 1.2747  | ↑ | 0.3502 |
|  | TAG533-FA182                   | 0.021572      | 0.3119   | 0.74598 | ↓      | -0.423        | 0.90645  | 0.94333 | 0.93198 | ↓             | -0.102 | 0.40023  | 0.90445 | 0.89031       | ↓   | -0.168 | 0.012817 | 0.28126       | 0.73729 | ↓  | -0.44  | 0.031896 | 0.1643   | 0.62353 | ↓ | -0.681 |
|  | TAG442-FA120                   | 0.022443      | 0.3119   | 0.78967 | ↓      | -0.341        | 0.49262  | 0.79006 | 0.81237 | ↓             | -0.3   | 0.68285  | 0.91633 | 0.94568       | ↓   | -0.081 | 0.57463  | 0.82003       | 1.0706  | ↑  | 0.0985 | 0.46957  | 0.68345  | 1.0493  | ↑ | 0.0695 |
|  | TAG442-FA182                   | 0.02275       | 0.3119   | 0.7902  | ↓      | -0.34         | 0.19152  | 0.61799 | 1.1772  | ↑             | 0.2353 | 0.064297 | 0.65022 | 1.4798        | ↑   | 0.5654 | 0.62115  | 0.83832       | 1.107   |    |        |          |          |         |   |        |



|                                    |         |         |         |   |        |          |         |         |   |         |          |         |         |   |        |          |         |         |   |        |          |          |         |   |        |
|------------------------------------|---------|---------|---------|---|--------|----------|---------|---------|---|---------|----------|---------|---------|---|--------|----------|---------|---------|---|--------|----------|----------|---------|---|--------|
| TAG502-FA180                       | 0.20795 | 0.71307 | 0.92949 | ↓ | -0.105 | 0.79533  | 0.9346  | 0.9407  | ↓ | -0.088  | 0.23597  | 0.85757 | 1.1414  | ↑ | 0.1908 | 0.010762 | 0.25411 | 0.64385 | ↓ | -0.635 | 0.027327 | 0.15485  | 0.67874 | ↓ | -0.559 |
| TAG493-FA182                       | 0.20796 | 0.71307 | 0.92875 | ↓ | -0.107 | 0.05669  | 0.34545 | 0.77089 | ↓ | -0.375  | 0.59674  | 0.91609 | 0.86143 | ↓ | -0.215 | 0.69447  | 0.85996 | 0.99018 | ↓ | -0.014 | 0.06158  | 0.24233  | 0.86033 | ↓ | -0.217 |
| TAG505-FA160                       | 0.20805 | 0.71307 | 0.81295 | ↓ | -0.299 | 0.070076 | 0.39187 | 1.2373  | ↑ | 0.3072  | 0.88858  | 0.96338 | 0.95229 | ↓ | -0.071 | 0.019731 | 0.28126 | 0.7798  | ↓ | -0.359 | 0.25268  | 0.50182  | 0.83722 | ↓ | -0.256 |
| 2-KETOHEXANOIC ACID_pos_2          | 0.21222 | 0.72154 | 1.2262  | ↑ | 0.2942 | 0.43846  | 0.78535 | 1.0369  | ↑ | 0.0523  | 0.027677 | 0.60889 | 1.5349  | ↑ | 0.6181 | 0.071085 | 0.35542 | 1.6782  | ↑ | 0.7469 | 0.34808  | 0.60203  | 1.1685  | ↑ | 0.2247 |
| TAG481-FA140                       | 0.21566 | 0.72583 | 1.0624  | ↑ | 0.0873 | 0.63154  | 0.85206 | 0.98028 | ↓ | -0.029  | 0.53395  | 0.91609 | 1.0349  | ↑ | 0.0494 | 0.38126  | 0.71215 | 0.95832 | ↓ | -0.061 | 0.1019   | 0.32507  | 0.94692 | ↓ | -0.079 |
| 2-HYDROXY-3-METHYLBUTYRIC ACID_pos | 0.22013 | 0.72583 | 1.1594  | ↑ | 0.2134 | 0.89559  | 0.94333 | 1.024   | ↑ | 0.0343  | 0.044091 | 0.60889 | 1.4815  | ↑ | 0.567  | 0.92223  | 0.97742 | 1.0834  | ↑ | 0.1155 | 0.58752  | 0.76856  | 1.2414  | ↑ | 0.312  |
| TAG420-FA160                       | 0.22094 | 0.72583 | 0.92391 | ↓ | -0.114 | 0.095574 | 0.46158 | 1.1293  | ↑ | 0.1754  | 0.07538  | 0.67934 | 1.3466  | ↑ | 0.4294 | 0.25295  | 0.59631 | 1.07    | ↑ | 0.0976 | 0.0293   | 0.16172  | 1.2714  | ↑ | 0.3464 |
| TAG482-FA141                       | 0.22095 | 0.72583 | 0.92089 | ↓ | -0.119 | 0.27075  | 0.67686 | 0.89643 | ↓ | -0.158  | 0.85287  | 0.9446  | 0.90249 | ↓ | -0.148 | 0.42208  | 0.7494  | 0.93016 | ↓ | -0.104 | 0.8188   | 0.92273  | 0.97251 | ↓ | -0.04  |
| L-ORNITHINE_pos_1                  | 0.22306 | 0.72583 | 0.52713 | ↓ | -0.924 | 0.089531 | 0.44766 | 1.9841  | ↑ | 0.9885  | 0.29257  | 0.8936  | 1.1456  | ↑ | 0.1961 | 0.11636  | 0.45371 | 1.5729  | ↑ | 0.6535 | 0.40848  | 0.64777  | 1.3358  | ↑ | 0.4177 |
| TAG503-FA140                       | 0.22627 | 0.72583 | 0.90387 | ↓ | -0.146 | 0.051709 | 0.34545 | 0.78732 | ↓ | -0.345  | 0.62586  | 0.91609 | 0.72251 | ↓ | -0.469 | 0.031076 | 0.29777 | 0.59095 | ↓ | -0.759 | 0.027228 | 0.15485  | 0.59935 | ↓ | -0.739 |
| TAG472-FA182                       | 0.22685 | 0.72583 | 0.90449 | ↓ | -0.145 | 0.67705  | 0.87102 | 0.93076 | ↓ | -0.104  | 0.46022  | 0.90445 | 1.0071  | ↑ | 0.0101 | 0.11947  | 0.45744 | 1.168   | ↑ | 0.2241 | 0.38038  | 0.62943  | 0.93356 | ↓ | -0.099 |
| FFA205                             | 0.22737 | 0.72583 | 1.4021  | ↑ | 0.4876 | 0.029546 | 0.33653 | 1.3923  | ↑ | 0.4775  | 0.13117  | 0.78853 | 1.0724  | ↑ | 0.1008 | 0.11173  | 0.44797 | 1.2682  | ↑ | 0.3427 | 0.37227  | 0.62535  | 1.1949  | ↑ | 0.2569 |
| TAG544-FA160                       | 0.22885 | 0.72583 | 1.2516  | ↑ | 0.3238 | 0.66717  | 0.87102 | 0.8438  | ↓ | -0.245  | 0.50822  | 0.90566 | 1.0779  | ↑ | 0.1082 | 0.63055  | 0.84537 | 0.81527 | ↓ | -0.295 | 0.74562  | 0.87416  | 0.76608 | ↓ | -0.384 |
| N-GLYCYL-L-PROLINE_neg_3           | 0.23446 | 0.73813 | 0.69115 | ↓ | -0.533 | 0.93742  | 0.96001 | 1.1748  | ↑ | 0.2324  | 0.41131  | 0.90445 | 1.42    | ↑ | 0.5059 | 0.64073  | 0.85097 | 1.2467  | ↑ | 0.3182 | 0.21734  | 0.46453  | 1.4276  | ↑ | 0.5136 |
| TAG461-FA120                       | 0.24539 | 0.7623  | 0.92733 | ↓ | -0.109 | 0.92004  | 0.95011 | 0.99562 | ↓ | -0.006  | 0.16304  | 0.82488 | 1.2285  | ↑ | 0.2969 | 0.96147  | 0.98367 | 1.034   | ↑ | 0.0483 | 0.3722   | 0.62535  | 1.0723  | ↑ | 0.1008 |
| TAG441-FA140                       | 0.24573 | 0.7623  | 0.93631 | ↓ | -0.095 | 0.64533  | 0.85708 | 0.8636  | ↓ | -0.212  | 0.56332  | 0.91609 | 1.0057  | ↑ | 0.0082 | 0.17276  | 0.53303 | 1.1131  | ↑ | 0.1546 | 0.11217  | 0.33764  | 1.1052  | ↑ | 0.1444 |
| FFA203                             | 0.24804 | 0.76305 | 1.3321  | ↑ | 0.4137 | 0.49043  | 0.79006 | 1.1394  | ↑ | 0.1882  | 0.3032   | 0.8936  | 0.96035 | ↓ | -0.058 | 0.66292  | 0.85669 | 1.136   | ↑ | 0.184  | 0.27376  | 0.52418  | 1.1408  | ↑ | 0.19   |
| TAG526-FA181                       | 0.24956 | 0.76305 | 0.92747 | ↓ | -0.109 | 0.03977  | 0.33653 | 1.2195  | ↑ | 0.2863  | 0.38708  | 0.89952 | 1.0284  | ↑ | 0.0404 | 0.38733  | 0.71215 | 1.1317  | ↑ | 0.1785 | 0.42706  | 0.66728  | 1.0628  | ↑ | 0.0879 |
| TAG482-FA182                       | 0.25342 | 0.7693  | 0.96029 | ↓ | -0.058 | 0.58354  | 0.82143 | 0.93399 | ↓ | -0.099  | 0.26046  | 0.86881 | 1.0071  | ↑ | 0.0102 | 0.14608  | 0.52121 | 0.87768 | ↓ | -0.188 | 0.030465 | 0.16195  | 0.88241 | ↓ | -0.18  |
| DAG140/181                         | 0.26079 | 0.78608 | 0.89645 | ↓ | -0.158 | 0.019973 | 0.30837 | 1.3672  | ↑ | 0.4512  | 0.49844  | 0.90528 | 1.093   | ↑ | 0.1283 | 0.22045  | 0.57251 | 1.1671  | ↑ | 0.2229 | 0.58159  | 0.76801  | 1.027   | ↑ | 0.0384 |
| TAG555-FA182                       | 0.26418 | 0.79069 | 0.7857  | ↓ | -0.348 | 0.06799  | 0.39049 | 1.2613  | ↑ | 0.6349  | 0.63828  | 0.91609 | 0.98916 | ↓ | -0.016 | 0.53718  | 0.80672 | 1.0829  | ↑ | 0.115  | 0.011929 | 0.085834 | 1.1281  | ↑ | 0.1739 |
| TAG587-FA225                       | 0.2692  | 0.79116 | 0.61095 | ↓ | -0.711 | 0.58884  | 0.82143 | 0.89547 | ↓ | -0.159  | 0.7148   | 0.92337 | 0.9225  | ↓ | -0.116 | 0.26768  | 0.6072  | 0.96271 | ↓ | -0.055 | 0.55997  | 0.75958  | 0.9135  | ↓ | -0.131 |
| FFA204                             | 0.27199 | 0.79116 | 1.3174  | ↑ | 0.3977 | 0.065086 | 0.37893 | 1.3753  | ↑ | 0.4598  | 0.12589  | 0.78853 | 1.0953  | ↑ | 0.1314 | 0.38177  | 0.71215 | 1.1292  | ↑ | 0.1753 | 0.27346  | 0.52418  | 1.204   | ↑ | 0.2679 |
| TAG534-FA170                       | 0.27423 | 0.79116 | 0.81548 | ↓ | -0.294 | 0.89673  | 0.94333 | 1.0297  | ↑ | 0.0423  | 0.82734  | 0.93765 | 0.95161 | ↓ | -0.072 | 0.28904  | 0.62673 | 0.96044 | ↓ | -0.058 | 0.10908  | 0.33764  | 1.1715  | ↑ | 0.2283 |
| TAG523-FA183                       | 0.27529 | 0.79116 | 0.65761 | ↓ | -0.605 | 0.32344  | 0.7222  | 1.1332  | ↑ | 0.1804  | 0.61551  | 0.91609 | 0.76675 | ↓ | -0.383 | 0.1891   | 0.54255 | 0.87653 | ↓ | -0.19  | 0.3617   | 0.61244  | 1.1764  | ↑ | 0.2344 |
| TAG421-FA140                       | 0.27604 | 0.79116 | 0.94867 | ↓ | -0.076 | 0.90625  | 0.94333 | 0.9654  | ↓ | -0.051  | 0.19491  | 0.85757 | 1.2004  | ↑ | 0.2635 | 0.053075 | 0.32506 | 1.1706  | ↑ | 0.2273 | 0.076329 | 0.27224  | 1.1273  | ↑ | 0.1729 |
| TAG552-FA181                       | 0.27674 | 0.79116 | 0.92754 | ↓ | -0.109 | 0.90663  | 0.94333 | 0.99941 | ↓ | -9E-04  | 0.91272  | 0.96978 | 0.94957 | ↓ | -0.075 | 0.31498  | 0.65459 | 0.9811  | ↓ | -0.028 | 0.63435  | 0.8096   | 0.95448 | ↓ | -0.067 |
| TAG532-FA160                       | 0.27737 | 0.79116 | 0.88985 | ↓ | -0.168 | 0.57165  | 0.81005 | 0.91445 | ↓ | -0.129  | 0.14579  | 0.82488 | 0.84776 | ↓ | -0.238 | 0.83336  | 0.93168 | 1.0235  | ↑ | 0.0336 | 0.40453  | 0.64391  | 0.95728 | ↓ | -0.063 |
| TAG521-FA201                       | 0.28706 | 0.81335 | 1.2548  | ↑ | 0.3275 | 0.50623  | 0.79092 | 1.1269  | ↑ | 0.1723  | 0.015577 | 0.60183 | 0.72493 | ↓ | -0.464 | 0.51771  | 0.79414 | 0.93873 | ↓ | -0.091 | 0.83224  | 0.29592  | 0.93241 | ↓ | -0.101 |
| TAG514-FA161                       | 0.28927 | 0.81417 | 0.94931 | ↓ | -0.075 | 0.88651  | 0.94333 | 1.0221  | ↑ | 0.0315  | 0.46049  | 0.90445 | 0.86937 | ↓ | -0.202 | 0.25512  | 0.59631 | 0.94186 | ↓ | -0.086 | 0.67764  | 0.83692  | 0.9615  | ↓ | -0.057 |
| FFA225                             | 0.29609 | 0.82773 | 1.2784  | ↑ | 0.3543 | 0.053223 | 0.34545 | 1.3608  | ↑ | 0.4445  | 0.16263  | 0.82488 | 1.0113  | ↑ | 0.0162 | 0.54107  | 0.80717 | 1.0941  | ↑ | 0.1298 | 0.27391  | 0.52418  | 1.1633  | ↑ | 0.2182 |
| TAG582-FA181                       | 0.29798 | 0.82773 | 0.94998 | ↓ | -0.074 | 0.92835  | 0.95348 | 0.73788 | ↓ | -0.439  | 0.36005  | 0.89952 | 0.79496 | ↓ | -0.331 | 0.045811 | 0.3212  | 0.382   | ↓ | -1.388 | 0.21751  | 0.46453  | 0.48652 | ↓ | -1.039 |
| TAG491-FA160                       | 0.3042  | 0.83952 | 1.0807  | ↑ | 0.112  | 0.025863 | 0.33123 | 0.78066 | ↓ | -0.357  | 0.52634  | 0.91257 | 0.87261 | ↓ | -0.197 | 0.55704  | 0.81895 | 0.9613  | ↓ | -0.057 | 0.042358 | 0.18707  | 0.89316 | ↓ | -0.163 |
| TAG502-FA160                       | 0.3087  | 0.8401  | 1.0378  | ↑ | 0.0536 | 0.24846  | 0.67022 | 0.80094 | ↓ | -0.32   | 0.4487   | 0.90445 | 0.7307  | ↓ | -0.453 | 0.01959  | 0.28126 | 0.54816 | ↓ | -0.867 | 0.037334 | 0.1803   | 0.57661 | ↓ | -0.794 |
| TAG481-FA160                       | 0.31014 | 0.8401  | 1.0689  | ↑ | 0.0961 | 0.80325  | 0.9346  | 1.0023  | ↑ | 0.0033  | 0.39156  | 0.89952 | 1.1014  | ↑ | 0.1394 | 0.6534   | 0.85669 | 0.98887 | ↓ | -0.016 | 0.88529  | 0.94759  | 1.0442  | ↑ | 0.0625 |
| BUTYRYL-COA_pos_1                  | 0.31191 | 0.8401  | 1.0619  | ↑ | 0.0867 | 0.72058  | 0.90338 | 0.85913 | ↓ | -0.219  | 0.037312 | 0.60889 | 2.2851  | ↑ | 1.1922 | 0.80811  | 0.911   | 0.90777 | ↓ | -0.14  | 0.10021  | 0.32265  | 1.902   | ↑ | 0.9275 |
| DAG161/182                         | 0.31232 | 0.8401  | 1.1663  | ↑ | 0.2219 | 0.2319   | 0.64607 | 1.4388  | ↑ | 0.5249  | 0.33819  | 0.89952 | 1.4099  | ↑ | 0.4956 | 0.26735  | 0.6072  | 1.2969  | ↑ | 0.3751 | 0.33941  | 0.60156  | 1.2208  | ↑ | 0.2878 |
| TAG520-FA200                       | 0.31864 | 0.85171 | 0.80524 | ↓ | -0.313 | 0.6404   | 0.85588 | 0.98863 | ↓ | -0.016  | 0.74989  | 0.92465 | 0.86001 | ↓ | -0.218 | 0.61422  | 0.83668 | 0.91903 | ↓ | -0.122 | 0.88746  | 0.94759  | 1.0868  | ↑ | 0.1201 |
| TAG503-FA141                       | 0.32196 | 0.8548  | 0.86439 | ↓ | -0.21  | 0.20326  | 0.61799 | 0.81662 | ↓ | -0.292  | 0.57913  | 0.91609 | 0.87574 | ↓ | -0.191 | 0.042836 | 0.32176 | 0.69337 | ↓ | -0.528 | 0.6059   | 0.78508  | 0.91095 | ↓ | -0.135 |
| TAG481-FA161                       | 0.32382 | 0.8548  | 1.0694  | ↑ | 0.0968 | 0.1211   | 0.50956 | 0.80926 | ↓ | -0.305  | 0.38694  | 0.89952 | 0.85791 | ↓ | -0.221 | 0.94051  | 0.98253 | 1.0033  | ↑ | 0.0047 | 0.89534  | 0.94839  | 1.0038  | ↑ | 0.0054 |
| TAG567-FA180                       | 0.32632 | 0.85609 | 0.7681  | ↓ | -0.381 | 0.33502  | 0.7325  | 0.99158 | ↓ | -0.012  | 0.66174  | 0.91609 | 0.86778 | ↓ | -0.205 | 0.20027  | 0.55631 | 0.92118 | ↓ | -0.118 | 0.19235  | 0.44188  | 0.89482 | ↓ | -0.16  |
| TAG441-FA181                       | 0.32927 | 0.85854 | 0.94746 | ↓ | -0.078 | 0.40688  | 0.77199 | 1.1224  | ↑ | 0.1666  | 0.065905 | 0.65022 | 1.6508  | ↑ | 0.7232 | 0.5305   | 0.80522 | 1.0836  | ↑ | 0.1158 | 0.032162 | 0.1643   | 1.2879  | ↑ | 0.365  |
| FFA182                             | 0.33749 | 0.87458 | 1.2744  | ↑ | 0.3498 | 0.32358  | 0.64607 | 1.104   | ↑ | 0.18616 | 0.18616  | 0.85075 | 1.2172  | ↑ | 0.2836 | 0.062202 | 0.33463 | 1.2103  | ↑ | 0.2753 | 0.15008  | 0.38657  | 1.2025  | ↑ | 0.2661 |
| DCEA260                            | 0.33994 | 0.87561 | 0.95002 | ↓ | -0.074 | 0.56568  | 0.81005 | 1.0804  | ↑ | 0.1115  | 0.79278  | 0.93191 | 0.85903 | ↓ | -0.219 | 0.99813  | 0.99876 | 1.1789  | ↑ | 0.2374 | 0.6947   | 0.84616  | 0.80446 | ↓ | -0.314 |
| ARGININOSUCCINIC ACID_neg_2        | 0.34365 | 0.87894 | 0.71051 | ↓ | -0.493 | 0.4731   | 0.789   | 0.66508 | ↓ | -0.588  | 0.083354 | 0.67934 | 0.73667 | ↓ | -0.441 | 0.31716  | 0.65459 |         |   |        |          |          |         |   |        |



|                                |         |         |         |   |        |          |         |         |   |        |          |         |         |   |        |          |         |         |   |        |          |          |         |   |        |
|--------------------------------|---------|---------|---------|---|--------|----------|---------|---------|---|--------|----------|---------|---------|---|--------|----------|---------|---------|---|--------|----------|----------|---------|---|--------|
| UREIDOSUCCINIC ACID_neg_2      | 0.59298 | 0.98115 | 0.44815 | ↓ | -1.158 | 0.82087  | 0.93749 | 0.85035 | ↓ | -0.234 | 0.78711  | 0.93191 | 1.3692  | ↑ | 0.4534 | 0.57434  | 0.82003 | 1.0257  | ↑ | 0.0367 | 0.44558  | 0.67633  | 1.3337  | ↑ | 0.4154 |
| TAG523-FA161                   | 0.59512 | 0.98115 | 1.1303  | ↑ | 0.1767 | 0.015059 | 0.30477 | 0.69712 | ↓ | -0.521 | 0.2243   | 0.85757 | 0.63073 | ↓ | -0.665 | 0.034077 | 0.29777 | 0.46191 | ↓ | -1.114 | 0.003161 | 0.047473 | 0.50969 | ↓ | -0.972 |
| TAG545-FA180                   | 0.60102 | 0.98115 | 0.52746 | ↓ | -0.923 | 0.072341 | 0.39417 | 1.443   | ↑ | 0.529  | 0.15756  | 0.82488 | 0.66463 | ↓ | -0.589 | 0.65838  | 0.85669 | 0.98218 | ↓ | -0.026 | 0.077727 | 0.27301  | 1.3155  | ↑ | 0.3956 |
| TAG483-FA160                   | 0.60144 | 0.98115 | 0.91006 | ↓ | -0.136 | 0.71438  | 0.90093 | 0.93179 | ↓ | -0.102 | 0.67888  | 0.91633 | 0.84038 | ↓ | -0.251 | 0.014739 | 0.28126 | 0.68162 | ↓ | -0.553 | 0.43972  | 0.67466  | 0.86701 | ↓ | -0.206 |
| TAG462-FA161                   | 0.60539 | 0.98115 | 0.98755 | ↓ | -0.018 | 0.34512  | 0.7364  | 0.76443 | ↓ | -0.388 | 0.68117  | 0.91633 | 0.83834 | ↓ | -0.254 | 0.28198  | 0.62093 | 1.1144  | ↑ | 0.1562 | 0.20451  | 0.45155  | 1.115   | ↑ | 0.1571 |
| TAG546-FA182                   | 0.60557 | 0.98115 | 0.60531 | ↓ | -0.724 | 0.44809  | 0.78535 | 1.3578  | ↑ | 0.4413 | 0.98333  | 0.99267 | 0.76137 | ↓ | -0.393 | 0.96978  | 0.98367 | 1.1086  | ↑ | 0.1488 | 0.000897 | 0.04108  | 1.493   | ↑ | 0.5782 |
| TAG504-FA182                   | 0.60635 | 0.98115 | 0.99186 | ↓ | -0.012 | 0.10542  | 0.46729 | 0.77834 | ↓ | -0.362 | 0.51997  | 0.91257 | 0.76565 | ↓ | -0.385 | 0.010396 | 0.25411 | 0.57921 | ↓ | -0.788 | 0.026855 | 0.15485  | 0.69057 | ↓ | -0.534 |
| TAG541-FA180                   | 0.60653 | 0.98115 | 1.0308  | ↑ | 0.0437 | 0.84299  | 0.94281 | 0.80319 | ↓ | -0.316 | 0.42448  | 0.90445 | 1.0524  | ↑ | 0.0737 | 0.10905  | 0.44277 | 0.67767 | ↓ | -0.561 | 0.002046 | 0.04577  | 0.48716 | ↓ | -1.038 |
| TAG500-FA140                   | 0.6111  | 0.98115 | 1.062   | ↑ | 0.0868 | 0.22145  | 0.63312 | 1.0896  | ↑ | 0.1238 | 0.41444  | 0.90445 | 1.0697  | ↑ | 0.0971 | 0.15583  | 0.52981 | 1.0879  | ↑ | 0.1216 | 0.11159  | 0.33764  | 1.0987  | ↑ | 0.1358 |
| HCEER201                       | 0.61289 | 0.98115 | 1.033   | ↑ | 0.0468 | 0.033079 | 0.33653 | 1.4373  | ↑ | 0.5234 | 0.041428 | 0.60889 | 2.2329  | ↑ | 1.1589 | 0.008533 | 0.24008 | 2.5148  | ↑ | 1.3305 | 0.006948 | 0.072023 | 1.3034  | ↑ | 0.3823 |
| SM220                          | 0.61447 | 0.98115 | 1.0836  | ↑ | 0.1158 | 0.021237 | 0.30837 | 1.5946  | ↑ | 0.6732 | 0.18914  | 0.85516 | 1.2535  | ↑ | 0.326  | 0.46515  | 0.76529 | 1.0113  | ↑ | 0.0162 | 0.010266 | 0.085834 | 1.5649  | ↑ | 0.646  |
| SM240                          | 0.61584 | 0.98115 | 0.98578 | ↓ | -0.021 | 0.009509 | 0.28471 | 1.6115  | ↑ | 0.6884 | 0.13312  | 0.78853 | 1.2363  | ↑ | 0.3061 | 0.55881  | 0.81895 | 0.97694 | ↓ | -0.034 | 0.31935  | 0.58002  | 1.1467  | ↑ | 0.1975 |
| DAG140/182                     | 0.6177  | 0.98115 | 1.1181  | ↑ | 0.1611 | 0.021928 | 0.30837 | 1.7711  | ↑ | 0.8246 | 0.008301 | 0.50401 | 1.5401  | ↑ | 0.623  | 0.18874  | 0.54255 | 1.2219  | ↑ | 0.2891 | 0.76231  | 0.88038  | 1.059   | ↑ | 0.0826 |
| TAG491-FA140                   | 0.6192  | 0.98115 | 1.0592  | ↑ | 0.0829 | 0.55323  | 0.81005 | 1.017   | ↑ | 0.0243 | 0.64402  | 0.91609 | 0.94004 | ↓ | -0.089 | 0.85028  | 0.94599 | 1.0182  | ↑ | 0.026  | 0.75983  | 0.88038  | 1.011   | ↑ | 0.0158 |
| TAG545-FA181                   | 0.62166 | 0.98115 | 0.67468 | ↓ | -0.568 | 0.43685  | 0.78535 | 1.2349  | ↑ | 0.3044 | 0.17185  | 0.83988 | 0.70754 | ↓ | -0.499 | 0.15516  | 0.52981 | 0.7541  | ↓ | -0.407 | 0.23236  | 0.485    | 1.0766  | ↑ | 0.1065 |
| TAG545-FA182                   | 0.62209 | 0.98115 | 0.63015 | ↓ | -0.666 | 0.54329  | 0.80863 | 1.2427  | ↑ | 0.3135 | 0.59806  | 0.91609 | 0.75257 | ↓ | -0.41  | 0.25536  | 0.59631 | 0.73844 | ↓ | -0.437 | 0.22149  | 0.47067  | 1.0963  | ↑ | 0.1326 |
| TAG503-FA182                   | 0.62286 | 0.98115 | 1.0174  | ↑ | 0.0248 | 0.017314 | 0.30837 | 0.72147 | ↓ | -0.471 | 0.41791  | 0.90445 | 0.69385 | ↓ | -0.527 | 0.023974 | 0.29111 | 0.55477 | ↓ | -0.85  | 0.000647 | 0.039297 | 0.55221 | ↓ | -0.857 |
| TAG563-FA181                   | 0.62523 | 0.98115 | 0.97986 | ↓ | -0.029 | 0.13713  | 0.53963 | 1.1111  | ↑ | 0.152  | 0.74073  | 0.92465 | 0.97835 | ↓ | -0.032 | 0.74798  | 0.87952 | 1.018   | ↑ | 0.0257 | 0.68135  | 0.83692  | 1.0503  | ↑ | 0.0708 |
| TAG493-FA160                   | 0.62577 | 0.98115 | 0.94476 | ↓ | -0.082 | 0.94058  | 0.96023 | 1.0503  | ↑ | 0.0708 | 0.53744  | 0.91609 | 1.0999  | ↑ | 0.1374 | 0.02074  | 0.28126 | 0.81094 | ↓ | -0.302 | 0.77531  | 0.89008  | 1.0824  | ↑ | 0.1143 |
| 2-PHOSPHOGLYCERATE_pos_4       | 0.63729 | 0.98115 | 0.98034 | ↓ | -0.029 | 0.51926  | 0.79099 | 0.98815 | ↓ | -0.017 | 0.5518   | 0.91609 | 1.067   | ↑ | 0.0936 | 0.6991   | 0.85996 | 1.0627  | ↑ | 0.0877 | 0.674    | 0.83692  | 1.3109  | ↑ | 0.3906 |
| TAG589-FA226                   | 0.64192 | 0.98115 | 0.99638 | ↓ | -0.005 | 0.89106  | 0.94333 | 0.94108 | ↓ | -0.088 | 0.13149  | 0.78853 | 0.65415 | ↓ | -0.612 | 0.4903   | 0.78044 | 1.0247  | ↑ | 0.0352 | 0.8306   | 0.92592  | 0.91701 | ↓ | -0.125 |
| TAG513-FA150                   | 0.64405 | 0.98115 | 1.091   | ↑ | 0.1256 | 0.35     | 0.7364  | 0.55643 | ↓ | -0.846 | 0.18413  | 0.85075 | 0.61738 | ↓ | -0.696 | 0.41617  | 0.74773 | 0.47097 | ↓ | -1.086 | 0.003678 | 0.047687 | 0.24047 | ↓ | -2.056 |
| TAG547-FA183                   | 0.64769 | 0.98115 | 0.63301 | ↓ | -0.66  | 0.44651  | 0.78535 | 1.3357  | ↑ | 0.4176 | 0.37286  | 0.89952 | 0.70512 | ↓ | -0.504 | 0.56972  | 0.82003 | 1.2683  | ↑ | 0.3429 | 0.008965 | 0.084673 | 1.4992  | ↑ | 0.5842 |
| TAG490-FA170                   | 0.65006 | 0.98115 | 0.99541 | ↓ | -0.007 | 0.57172  | 0.81005 | 1.0543  | ↑ | 0.0763 | 0.84654  | 0.94183 | 0.97458 | ↓ | -0.037 | 0.029858 | 0.29511 | 1.1263  | ↑ | 0.1716 | 0.11599  | 0.33764  | 1.084   | ↑ | 0.1164 |
| TAG523-FA182                   | 0.65221 | 0.98115 | 0.8509  | ↓ | -0.233 | 0.89692  | 0.94333 | 0.9148  | ↓ | -0.128 | 0.36257  | 0.89952 | 0.58393 | ↓ | -0.776 | 0.046474 | 0.32379 | 0.50143 | ↓ | -0.996 | 0.1154   | 0.33764  | 0.54276 | ↓ | -0.882 |
| TAG460-FA140                   | 0.65222 | 0.98115 | 0.98374 | ↓ | -0.024 | 0.48162  | 0.789   | 1.0339  | ↑ | 0.0481 | 0.23097  | 0.85757 | 1.0889  | ↑ | 0.1228 | 0.14409  | 0.51897 | 1.0613  | ↑ | 0.0859 | 0.038597 | 0.18431  | 1.1523  | ↑ | 0.2045 |
| MESACONIC ACID_neg_1           | 0.65224 | 0.98115 | 1.0431  | ↑ | 0.0609 | 0.98551  | 0.99017 | 1.0661  | ↑ | 0.0924 | 0.61634  | 0.91609 | 1.1842  | ↑ | 0.2439 | 0.75098  | 0.87952 | 0.48071 | ↓ | -1.057 | 0.93426  | 0.95908  | 0.71243 | ↓ | -0.489 |
| TAG566-FA225                   | 0.65615 | 0.98115 | 1.0965  | ↑ | 0.1329 | 0.55882  | 0.81005 | 0.88414 | ↓ | -0.178 | 0.14473  | 0.82488 | 0.66379 | ↓ | -0.591 | 0.19021  | 0.54255 | 0.86554 | ↓ | -0.208 | 0.47725  | 0.68524  | 0.85934 | ↓ | -0.219 |
| TAG522-FA161                   | 0.6566  | 0.98115 | 1.0622  | ↑ | 0.0871 | 0.045716 | 0.33653 | 0.74453 | ↓ | -0.426 | 0.47668  | 0.90445 | 0.87414 | ↓ | -0.194 | 0.048341 | 0.32506 | 0.67005 | ↓ | -0.72  | 0.02193  | 0.13315  | 0.66944 | ↓ | -0.579 |
| TAG420-FA140                   | 0.67714 | 0.98115 | 0.98225 | ↓ | -0.026 | 0.4196   | 0.77704 | 1.0293  | ↑ | 0.0417 | 0.17468  | 0.84364 | 1.1457  | ↑ | 0.1962 | 0.09875  | 0.43267 | 1.1055  | ↑ | 0.1447 | 0.010385 | 0.085834 | 1.2145  | ↑ | 0.2804 |
| SM180                          | 0.67768 | 0.98115 | 0.98556 | ↓ | -0.021 | 0.32085  | 0.7222  | 1.1584  | ↑ | 0.2121 | 0.87933  | 0.95883 | 0.90337 | ↓ | -0.147 | 0.002181 | 0.18171 | 0.69114 | ↓ | -0.533 | 0.14312  | 0.38391  | 1.139   | ↑ | 0.1877 |
| METHIONINE_pos_1               | 0.67803 | 0.98115 | 1.8563  | ↑ | 0.8924 | 0.44696  | 0.78535 | 0.8047  | ↓ | -0.313 | 0.093014 | 0.70591 | 0.75425 | ↓ | -0.407 | 0.90024  | 0.96604 | 1.0182  | ↑ | 0.026  | 0.19642  | 0.44422  | 1.6262  | ↑ | 0.7015 |
| TAG544-FA182                   | 0.67816 | 0.98115 | 0.71835 | ↓ | -0.477 | 0.88713  | 0.94333 | 1.0522  | ↑ | 0.0734 | 0.32221  | 0.89952 | 0.68582 | ↓ | -0.544 | 0.054792 | 0.32506 | 0.53167 | ↓ | -0.911 | 0.63886  | 0.81293  | 0.74367 | ↓ | -0.427 |
| TAG512-FA160                   | 0.67843 | 0.98115 | 0.98463 | ↓ | -0.022 | 0.043169 | 0.33653 | 1.1731  | ↑ | 0.2303 | 0.60007  | 0.91609 | 0.99511 | ↓ | -0.007 | 0.45997  | 0.76529 | 1.0923  | ↑ | 0.1274 | 0.32246  | 0.58318  | 1.0917  | ↑ | 0.1266 |
| TAG440-FA160                   | 0.67922 | 0.98115 | 0.99452 | ↓ | -0.008 | 0.17362  | 0.61491 | 1.087   | ↑ | 0.1204 | 0.11106  | 0.76666 | 1.1828  | ↑ | 0.2423 | 0.20679  | 0.56224 | 1.0556  | ↑ | 0.0781 | 0.029015 | 0.16172  | 1.1847  | ↑ | 0.2446 |
| CE170                          | 0.68268 | 0.98115 | 1.0566  | ↑ | 0.0794 | 0.022081 | 0.30837 | 1.3959  | ↑ | 0.4812 | 0.83527  | 0.93937 | 1.0051  | ↑ | 0.0073 | 0.7512   | 0.87952 | 1.1111  | ↑ | 0.152  | 0.069989 | 0.25435  | 1.35    | ↑ | 0.4329 |
| DAG181/181                     | 0.68798 | 0.98115 | 0.93365 | ↓ | -0.099 | 0.010738 | 0.28524 | 1.2205  | ↑ | 0.2875 | 0.61576  | 0.91609 | 0.96028 | ↓ | -0.058 | 0.73252  | 0.8745  | 1.0422  | ↑ | 0.0596 | 0.075394 | 0.27155  | 1.1193  | ↑ | 0.1627 |
| TAG554-FA181                   | 0.68827 | 0.98115 | 0.94919 | ↓ | -0.075 | 0.19171  | 0.61799 | 1.2308  | ↑ | 0.2996 | 0.44685  | 0.90445 | 0.81357 | ↓ | -0.298 | 0.95374  | 0.98367 | 1.0641  | ↑ | 0.0897 | 0.80706  | 0.91467  | 0.96291 | ↓ | -0.055 |
| TAG522-FA181                   | 0.69021 | 0.98115 | 1.0797  | ↑ | 0.1106 | 0.64413  | 0.85708 | 0.84881 | ↓ | -0.236 | 0.67206  | 0.91633 | 0.57936 | ↓ | -0.787 | 0.017138 | 0.28126 | 0.61933 | ↓ | -0.691 | 0.020505 | 0.12816  | 0.576   | ↓ | -0.796 |
| ADENOSINE PHOSPHOSULFATE_neg_2 | 0.69947 | 0.98115 | 1.2278  | ↑ | 0.2961 | 0.002002 | 0.21266 | 5.5775  | ↑ | 2.4796 | 0.054762 | 0.65022 | 1.9702  | ↑ | 0.9783 | 0.25882  | 0.60109 | 1.1436  | ↑ | 0.1936 | 0.71809  | 0.85676  | 1.3653  | ↑ | 0.4492 |
| 4-IMIDAZOLEACETATE_pos_1       | 0.69968 | 0.98115 | 1.1663  | ↑ | 0.2219 | 0.18839  | 0.61799 | 0.87095 | ↓ | -0.199 | 0.004489 | 0.38156 | 0.76007 | ↓ | -0.396 | 0.42649  | 0.7494  | 0.71689 | ↓ | -0.48  | 0.69934  | 0.84685  | 1.2316  | ↑ | 0.3006 |
| ALLANTOIN_neg_2                | 0.7071  | 0.98115 | 0.88452 | ↓ | -0.177 | 0.74332  | 0.91568 | 1.1341  | ↑ | 0.1815 | 0.12186  | 0.78472 | 0.87871 | ↓ | -0.187 | 0.11636  | 0.45371 | 1.4641  | ↑ | 0.5501 | 0.83542  | 0.92651  | 1.1241  | ↑ | 0.1688 |
| CE141                          | 0.70904 | 0.98115 | 0.95215 | ↓ | -0.071 | 0.44903  | 0.78535 | 1.1646  | ↑ | 0.2198 | 0.9518   | 0.97945 | 0.83097 | ↓ | -0.267 | 0.35688  | 0.70254 | 1.1073  | ↑ | 0.1471 | 0.2875   | 0.54065  | 1.1063  | ↑ | 0.1457 |
| TAG511-FA180                   | 0.7117  | 0.98115 | 1.0317  | ↑ | 0.045  | 0.39122  | 0.77199 | 0.87819 | ↓ | -0.187 | 0.4036   | 0.90445 | 1.0073  | ↑ | 0.0105 | 0.98379  | 0.99314 | 0.93583 | ↓ | -0.096 | 0.016893 | 0.11218  | 0.7609  | ↓ | -0.394 |
| TAG543-FA182                   | 0.71367 | 0.98115 | 0.86934 | ↓ | -0.202 | 0.86633  | 0.94333 | 0.84612 | ↓ | -0.241 | 0.64428  | 0.91609 | 0.77309 | ↓ |        |          |         |         |   |        |          |          |         |   |        |



|                                    |         |         |         |   |        |          |         |         |   |        |          |         |         |   |        |          |         |         |   |        |          |          |         |   |        |
|------------------------------------|---------|---------|---------|---|--------|----------|---------|---------|---|--------|----------|---------|---------|---|--------|----------|---------|---------|---|--------|----------|----------|---------|---|--------|
| FFA241                             | 0.88374 | 0.98115 | 1.0952  | ↑ | 0.1312 | 0.65289  | 0.86323 | 1.1222  | ↑ | 0.1663 | 0.63316  | 0.91609 | 0.78721 | ↓ | -0.345 | 0.99806  | 0.99876 | 1.1417  | ↑ | 0.1911 | 0.34989  | 0.60203  | 1.1685  | ↑ | 0.2246 |
| METANEPHRINE_pos_1                 | 0.88399 | 0.98115 | 1.1147  | ↑ | 0.1567 | 0.82031  | 0.93749 | 0.90699 | ↓ | -0.141 | 0.01204  | 0.58079 | 1.2913  | ↑ | 0.3688 | 0.9622   | 0.98367 | 1.0619  | ↑ | 0.0867 | 0.14954  | 0.38657  | 0.90965 | ↓ | -0.137 |
| TAG442-FA160                       | 0.88652 | 0.98115 | 1.1433  | ↑ | 0.1932 | 0.19619  | 0.61799 | 1.2234  | ↑ | 0.2909 | 0.021668 | 0.60889 | 1.2421  | ↑ | 0.3128 | 0.83297  | 0.93168 | 0.97032 | ↓ | -0.043 | 0.89757  | 0.94839  | 1.0686  | ↑ | 0.0957 |
| TAG526-FA182                       | 0.88824 | 0.98115 | 0.89885 | ↓ | -0.154 | 0.90439  | 0.94333 | 1.0073  | ↑ | 0.0104 | 0.76142  | 0.92465 | 0.92999 | ↓ | -0.105 | 0.34075  | 0.69155 | 0.88371 | ↓ | -0.178 | 0.32779  | 0.58966  | 1.1516  | ↑ | 0.2036 |
| TAG422-FA120                       | 0.89128 | 0.98115 | 1.29    | ↑ | 0.3674 | 0.81365  | 0.9346  | 0.96682 | ↓ | -0.049 | 0.92526  | 0.96978 | 0.8655  | ↓ | -0.208 | 0.27619  | 0.61135 | 0.92104 | ↓ | -0.119 | 0.2506   | 0.50182  | 1.1717  | ↑ | 0.2286 |
| N-ACETYLLALANINE_pos_2             | 0.89477 | 0.98115 | 2.1918  | ↑ | 1.1321 | 0.77844  | 0.9346  | 1.0086  | ↑ | 0.0123 | 0.79124  | 0.93191 | 1.508   | ↑ | 0.5926 | 0.16948  | 0.53303 | 2.7284  | ↑ | 1.4481 | 0.4356   | 0.6732   | 2.1252  | ↑ | 1.0876 |
| TAG525-FA161                       | 0.89573 | 0.98115 | 0.88476 | ↓ | -0.177 | 0.9288   | 0.95348 | 0.77101 | ↓ | -0.375 | 0.29398  | 0.8936  | 0.65774 | ↓ | -0.604 | 0.00511  | 0.23331 | 0.22237 | ↓ | -2.169 | 0.12831  | 0.36115  | 0.32549 | ↓ | -1.619 |
| FFA181                             | 0.89584 | 0.98115 | 1.0611  | ↑ | 0.0856 | 0.49092  | 0.79006 | 1.0772  | ↓ | 0.1073 | 0.93556  | 0.96978 | 1.2153  | ↑ | 0.2813 | 0.087747 | 0.39255 | 1.1945  | ↑ | 0.2564 | 0.86717  | 0.94499  | 1.0631  | ↑ | 0.0883 |
| TAG568-FA160                       | 0.89594 | 0.98115 | 0.99601 | ↓ | -0.006 | 0.18779  | 0.61799 | 0.81477 | ↓ | -0.296 | 0.21494  | 0.85757 | 0.86181 | ↓ | -0.215 | 0.69618  | 0.85996 | 0.90857 | ↓ | -0.138 | 0.35415  | 0.60396  | 0.86355 | ↓ | -0.212 |
| TAG568-FA161                       | 0.89605 | 0.98115 | 1.1195  | ↑ | 0.1629 | 0.69725  | 0.88988 | 0.92073 | ↓ | -0.119 | 0.89603  | 0.96653 | 0.91344 | ↓ | -0.131 | 0.68317  | 0.85718 | 0.93829 | ↓ | -0.092 | 0.18681  | 0.43384  | 1.202   | ↑ | 0.2655 |
| TAG564-FA201                       | 0.89739 | 0.98115 | 0.87913 | ↓ | -0.186 | 0.44107  | 0.78535 | 1.029   | ↑ | 0.0412 | 0.17842  | 0.84645 | 0.69517 | ↓ | -0.525 | 0.035031 | 0.29777 | 0.36769 | ↓ | -1.444 | 0.15814  | 0.39761  | 0.47312 | ↓ | -1.08  |
| GLUCOSE 1-PHOSPHATE_pos_2          | 0.89952 | 0.98115 | 0.71107 | ↓ | -0.492 | 0.3705   | 0.7534  | 0.74737 | ↓ | -0.42  | 0.34174  | 0.89952 | 1.4404  | ↑ | 0.5265 | 0.87507  | 0.95232 | 1.0076  | ↑ | 0.0109 | 0.46182  | 0.67752  | 1.18    | ↑ | 0.2388 |
| TAG511-FA181                       | 0.90234 | 0.98115 | 1.0318  | ↑ | 0.0451 | 0.47031  | 0.789   | 0.8723  | ↓ | -0.197 | 0.75584  | 0.92465 | 0.89215 | ↓ | -0.165 | 0.25432  | 0.59631 | 0.9267  | ↓ | -0.11  | 0.000244 | 0.020709 | 0.74149 | ↓ | -0.432 |
| TAG490-FA180                       | 0.90582 | 0.98115 | 0.97617 | ↓ | -0.035 | 0.31483  | 0.7222  | 1.0759  | ↑ | 0.1056 | 0.99421  | 0.99592 | 0.97891 | ↓ | -0.031 | 0.25518  | 0.59631 | 1.0446  | ↑ | 0.063  | 0.57082  | 0.7653   | 0.9814  | ↓ | -0.027 |
| TAG503-FA183                       | 0.90827 | 0.98115 | 0.95644 | ↓ | -0.064 | 0.67985  | 0.87102 | 1.082   | ↑ | 0.1137 | 0.34714  | 0.89952 | 0.7859  | ↓ | -0.348 | 0.67528  | 0.85669 | 0.94519 | ↓ | -0.081 | 0.21375  | 0.46113  | 1.2071  | ↑ | 0.2716 |
| DAG180/181                         | 0.90914 | 0.98115 | 0.98505 | ↓ | -0.022 | 0.018791 | 0.30837 | 1.3255  | ↑ | 0.4066 | 0.25163  | 0.85757 | 1.0931  | ↑ | 0.1284 | 0.24638  | 0.59631 | 1.1187  | ↑ | 0.1618 | 0.1324   | 0.37018  | 1.0886  | ↑ | 0.1225 |
| TAG568-FA205                       | 0.91259 | 0.98115 | 0.98669 | ↓ | -0.019 | 0.54182  | 0.80863 | 1.3138  | ↑ | 0.3937 | 0.47378  | 0.90445 | 0.74794 | ↓ | -0.419 | 0.10571  | 0.44277 | 0.88584 | ↓ | -0.175 | 0.57413  | 0.76731  | 0.94468 | ↓ | -0.082 |
| TAG461-FA161                       | 0.91284 | 0.98115 | 1.016   | ↑ | 0.0229 | 0.35396  | 0.74053 | 0.79028 | ↓ | -0.34  | 0.93788  | 0.96983 | 0.87858 | ↓ | -0.187 | 0.25471  | 0.59631 | 1.1152  | ↑ | 0.1573 | 0.14457  | 0.38391  | 1.0936  | ↑ | 0.1291 |
| CHOLINE_pos_1                      | 0.91406 | 0.98115 | 0.92005 | ↓ | -0.12  | 0.458    | 0.789   | 0.82657 | ↓ | -0.275 | 0.96664  | 0.98502 | 1.2704  | ↑ | 0.3453 | 0.46818  | 0.76529 | 0.70578 | ↓ | -0.503 | 0.14634  | 0.38391  | 1.411   | ↑ | 0.4967 |
| TAG481-FA180                       | 0.91464 | 0.98115 | 1.0187  | ↑ | 0.0267 | 0.50124  | 0.79092 | 1.048   | ↑ | 0.0676 | 0.037043 | 0.60889 | 1.2735  | ↑ | 0.3488 | 0.60129  | 0.83262 | 1.0457  | ↑ | 0.0645 | 0.66606  | 0.83503  | 0.99265 | ↓ | -0.011 |
| TAG541-FA181                       | 0.91496 | 0.98115 | 1.011   | ↑ | 0.0158 | 0.054915 | 0.34545 | 1.1683  | ↑ | 0.2245 | 0.46503  | 0.90445 | 1.0168  | ↑ | 0.024  | 0.92212  | 0.97742 | 1.0368  | ↑ | 0.0521 | 0.51153  | 0.70939  | 1.0598  | ↑ | 0.0838 |
| TAG491-FA181                       | 0.92159 | 0.98115 | 1.0123  | ↑ | 0.0177 | 0.088337 | 0.44766 | 0.837   | ↓ | -0.257 | 0.81127  | 0.93357 | 0.89949 | ↓ | -0.153 | 0.44817  | 0.75374 | 0.94705 | ↓ | -0.078 | 0.000388 | 0.027453 | 0.8245  | ↓ | -0.278 |
| TAG544-FA181                       | 0.92228 | 0.98115 | 0.74743 | ↓ | -0.42  | 0.63091  | 0.85206 | 1.0515  | ↑ | 0.0725 | 0.21826  | 0.85757 | 0.65672 | ↓ | -0.607 | 0.03785  | 0.30935 | 0.55272 | ↓ | -0.855 | 0.42874  | 0.66746  | 0.70742 | ↓ | -0.499 |
| TAG471-FA181                       | 0.92398 | 0.98115 | 1.0322  | ↑ | 0.0458 | 0.83384  | 0.93768 | 1.0053  | ↑ | 0.0076 | 0.77013  | 0.92465 | 0.92143 | ↓ | -0.118 | 0.032795 | 0.29777 | 1.1363  | ↑ | 0.1844 | 0.14609  | 0.38391  | 1.1117  | ↑ | 0.1528 |
| TAG525-FA182                       | 0.92457 | 0.98115 | 0.688   | ↓ | -0.54  | 0.78775  | 0.9346  | 1.0736  | ↑ | 0.1025 | 0.33221  | 0.89952 | 0.71086 | ↓ | -0.492 | 0.052414 | 0.32506 | 0.47672 | ↓ | -1.069 | 0.43806  | 0.67455  | 0.73416 | ↓ | -0.446 |
| TAG461-FA140                       | 0.92716 | 0.98115 | 1.0163  | ↑ | 0.0234 | 0.33819  | 0.7325  | 0.84111 | ↓ | -0.25  | 0.52822  | 0.91257 | 0.99816 | ↓ | -0.003 | 0.60144  | 0.83262 | 1.06    | ↑ | 0.084  | 0.064309 | 0.24489  | 1.1139  | ↑ | 0.1556 |
| TAG501-FA180                       | 0.92806 | 0.98115 | 1.0415  | ↑ | 0.0587 | 0.71774  | 0.90248 | 0.94004 | ↓ | -0.089 | 0.39017  | 0.89952 | 1.1567  | ↑ | 0.21   | 0.11596  | 0.45371 | 0.80321 | ↓ | -0.316 | 0.001451 | 0.04577  | 0.74649 | ↓ | -0.422 |
| TAG463-FA181                       | 0.93194 | 0.98281 | 0.9863  | ↓ | -0.02  | 0.66367  | 0.87102 | 1.096   | ↑ | 0.1322 | 0.32419  | 0.89952 | 1.1909  | ↑ | 0.2521 | 0.59082  | 0.8287  | 1.0573  | ↑ | 0.0804 | 0.039999 | 0.1866   | 1.3668  | ↑ | 0.4508 |
| 2-HYDROXY-3-METHYLBUTYRIC ACID_neg | 0.94943 | 0.98793 | 1.1316  | ↑ | 0.1783 | 0.39513  | 0.77199 | 0.40374 | ↓ | -1.309 | 0.25425  | 0.85757 | 1.2663  | ↑ | 0.3407 | 0.62473  | 0.84022 | 0.34679 | ↓ | -1.528 | 0.5666   | 0.76205  | 1.0085  | ↑ | 0.0122 |
| FFA226                             | 0.95325 | 0.98793 | 1.0942  | ↑ | 0.1299 | 0.20811  | 0.6246  | 1.1604  | ↑ | 0.2146 | 0.20373  | 0.85757 | 0.98738 | ↓ | -0.018 | 0.91392  | 0.97347 | 1.0185  | ↑ | 0.0264 | 0.27627  | 0.52418  | 1.0875  | ↑ | 0.1211 |
| TAG462-FA160                       | 0.95386 | 0.98793 | 1.0837  | ↑ | 0.116  | 0.33353  | 0.7325  | 0.89611 | ↓ | -0.158 | 0.71011  | 0.92337 | 1.0025  | ↑ | 0.0036 | 0.73982  | 0.87828 | 0.97263 | ↓ | -0.04  | 0.2328   | 0.485    | 1.0882  | ↑ | 0.1219 |
| TAG564-FA204                       | 0.95435 | 0.98793 | 1.026   | ↑ | 0.037  | 0.33654  | 0.7325  | 1.4617  | ↑ | 0.5477 | 0.93184  | 0.96978 | 0.74301 | ↓ | -0.429 | 0.69833  | 0.85996 | 0.95039 | ↓ | -0.073 | 0.49752  | 0.70482  | 0.83622 | ↓ | -0.258 |
| TAG442-FA140                       | 0.96042 | 0.98793 | 1.1865  | ↑ | 0.2467 | 0.95361  | 0.96297 | 0.94024 | ↓ | -0.089 | 0.93486  | 0.96978 | 0.89519 | ↓ | -0.16  | 0.21818  | 0.57251 | 1.057   | ↑ | 0.0799 | 0.15746  | 0.39761  | 1.1702  | ↑ | 0.2268 |
| TAG492-FA150                       | 0.96374 | 0.98793 | 1.0153  | ↑ | 0.0219 | 0.078193 | 0.4154  | 0.73311 | ↓ | -0.448 | 0.716    | 0.92337 | 0.8135  | ↓ | -0.298 | 0.21783  | 0.57251 | 0.83529 | ↓ | -0.26  | 0.000244 | 0.020709 | 0.70434 | ↓ | -0.506 |
| TAG481-FA141                       | 0.96424 | 0.98793 | 1.0548  | ↑ | 0.077  | 0.051238 | 0.34545 | 0.75333 | ↓ | -0.409 | 0.41852  | 0.90445 | 1.0332  | ↑ | 0.0471 | 0.54757  | 0.8137  | 0.96356 | ↓ | -0.054 | 0.050887 | 0.21413  | 1.1907  | ↑ | 0.2519 |
| TAG460-FA180                       | 0.96429 | 0.98793 | 1.0027  | ↑ | 0.0038 | 0.056897 | 0.34545 | 1.1661  | ↑ | 0.2216 | 0.067317 | 0.65022 | 1.3119  | ↑ | 0.3917 | 0.43553  | 0.7494  | 1.0415  | ↑ | 0.0587 | 0.11528  | 0.33764  | 1.115   | ↑ | 0.157  |
| TAG461-FA160                       | 0.96662 | 0.98793 | 1.0138  | ↑ | 0.0198 | 0.42396  | 0.78001 | 0.87765 | ↓ | -0.188 | 0.61817  | 0.91609 | 1.0132  | ↑ | 0.0189 | 0.61008  | 0.834   | 1.0502  | ↑ | 0.0707 | 0.076869 | 0.27224  | 1.1086  | ↑ | 0.1488 |
| TAG471-FA160                       | 0.96748 | 0.98793 | 1.0141  | ↑ | 0.0202 | 0.37842  | 0.76115 | 0.84136 | ↓ | -0.249 | 0.91932  | 0.96978 | 0.88793 | ↓ | -0.171 | 0.28513  | 0.62143 | 1.0908  | ↑ | 0.1254 | 0.34113  | 0.60156  | 1.0717  | ↑ | 0.0998 |
| TAG470-FA150                       | 0.96856 | 0.98793 | 1.0112  | ↑ | 0.016  | 0.80654  | 0.9346  | 0.97472 | ↓ | -0.037 | 0.76185  | 0.92465 | 0.97803 | ↓ | -0.032 | 0.033732 | 0.29777 | 1.1213  | ↑ | 0.1652 | 0.53543  | 0.73883  | 1.0216  | ↑ | 0.0308 |
| TAG543-FA161                       | 0.96916 | 0.98793 | 1.087   | ↑ | 0.1204 | 0.58984  | 0.82143 | 0.82048 | ↓ | -0.285 | 0.23431  | 0.85757 | 0.9034  | ↓ | -0.147 | 0.081589 | 0.38105 | 0.61704 | ↓ | -0.697 | 0.70609  | 0.84685  | 0.8631  | ↓ | -0.212 |
| TAG530-FA160                       | 0.96984 | 0.98793 | 0.986   | ↓ | -0.02  | 0.42051  | 0.77704 | 1.0665  | ↑ | 0.0929 | 0.4736   | 0.90445 | 0.85203 | ↓ | -0.231 | 0.87614  | 0.95232 | 0.99467 | ↓ | -0.008 | 0.70737  | 0.84685  | 1.0324  | ↑ | 0.046  |
| NADPH_pos_1                        | 0.97083 | 0.98793 | 1.1645  | ↑ | 0.2197 | 0.3566   | 0.74053 | 0.80728 | ↓ | -0.309 | 0.094919 | 0.70773 | 2.2022  | ↑ | 1.139  | 0.7128   | 0.86555 | 1.5271  | ↑ | 0.6108 | 0.45864  | 0.67752  | 0.94526 | ↓ | -0.081 |
| FFA201                             | 0.97233 | 0.98793 | 1.127   | ↑ | 0.1725 | 0.047872 | 0.33909 | 1.2983  | ↑ | 0.3766 | 0.3424   | 0.89952 | 1.0023  | ↑ | 0.0033 | 0.16667  | 0.53303 | 1.1851  | ↑ | 0.245  | 0.2974   | 0.55195  | 1.1567  | ↑ | 0.21   |
| TAG543-FA180                       | 0.97656 | 0.98793 | 0.90367 | ↓ | -0.146 | 0.79039  | 0.9346  | 0.90848 | ↓ | -0.138 | 0.49728  | 0.90528 | 0.7878  | ↓ | -0.344 | 0.029063 | 0.29511 | 0.5167  | ↓ | -0.953 | 0.055193 | 0.22555  | 0.5289  | ↓ | -0.919 |
| TAG525-FA160                       | 0.97989 | 0.98793 | 0.61567 | ↓ | -0.7   | 0.77408  | 0.9346  | 1.2798  | ↑ | 0.3559 | 0.24438  | 0.85757 | 0.6651  | ↓ | -0.588 | 0.56436  | 0.82003 | 0.89716 | ↓ | -0.157 |          |          |         |   |        |

Supplementary Table S2A. List of dysregulated metabolites for female, male, Wild type and APCHI mice following exposure to 9.5 Gy of Gamma-radiation, 24 h post-irradiation showing penotype dependent response of radiation.

|                                | 9.5Gy / 0.0Gy |          |         |          | 9.5Gy / 0.0Gy |         |         |          | 9.5Gy / 0.0Gy |         |         |          | 9.5Gy / 0.0Gy |         |         |          |
|--------------------------------|---------------|----------|---------|----------|---------------|---------|---------|----------|---------------|---------|---------|----------|---------------|---------|---------|----------|
|                                | Female        |          |         |          | Male          |         |         |          | WildType      |         |         |          | APCHI         |         |         |          |
|                                | 24h           |          |         |          |               |         |         |          |               |         |         |          |               |         |         |          |
|                                | name          | p-value  | FDR     | FC       | LOG2FC        | p-value | FDR     | FC       | LOG2FC        | p-value | FDR     | FC       | LOG2FC        | p-value | FDR     | FC       |
| XANTHOSINE_neg_1               | 6.97E-07      | 0.000148 | 3.3658  | ↑ 1.7509 | 0.005664      | 0.2407  | 2.4211  | ↑ 1.2756 | 0.009274      | 0.42014 | 2.3964  | ↑ 1.2609 | 0.015143      | 0.52739 | 2.6491  | ↑ 1.4055 |
| CYSTEINE_neg_5                 | 0.002393      | 0.16951  | 5.9315  | ↑ 2.5684 | 0.043996      | 0.58433 | 1.391   | ↑ 0.4761 | 0.001529      | 0.27225 | 2.6901  | ↑ 1.4277 | 0.023941      | 0.55845 | 1.9966  | ↑ 0.9976 |
| PYROPHOSPHATE_neg_3            | 0.004755      | 0.25259  | 0.20202 | ↓ -2.307 | 0.46392       | 0.85354 | 0.52654 | ↓ -0.925 | 0.46008       | 0.93557 | 0.12072 | ↓ -3.05  | 0.006983      | 0.42218 | 0.13069 | ↓ -2.93  |
| N-ACETYLGLUTAMINE_pos_3        | 0.006909      | 0.29364  | 2.0563  | ↑ 1.0401 | 0.008954      | 0.31711 | 2.5052  | ↑ 1.3249 | 0.03033       | 0.51706 | 2.3156  | ↑ 1.2114 | 0.018711      | 0.55845 | 2.1597  | ↑ 1.1108 |
| INDOLE-3-CARBOXYLIC ACID_neg_1 | 0.027135      | 0.697    | 2.729   | ↑ 1.4484 | 0.004853      | 0.2407  | 1.8434  | ↑ 0.8824 | 0.031632      | 0.51706 | 1.654   | ↑ 0.726  | 0.001499      | 0.21242 | 3.1033  | ↑ 1.6338 |
| CE204                          | 0.035713      | 0.79883  | 1.3368  | ↑ 0.4187 | 0.19916       | 0.72412 | 1.2204  | ↑ 0.2873 | 0.044573      | 0.60334 | 1.3326  | ↑ 0.4142 | 0.03792       | 0.55845 | 1.598   | ↑ 0.6763 |
| N-ACETYLORNITHINE_neg_3        | 0.060398      | 0.95219  | 0.84467 | ↓ -0.244 | 0.41447       | 0.83033 | 0.91471 | ↓ -0.129 | 0.52916       | 0.94319 | 0.94664 | ↓ -0.079 | 0.048825      | 0.55845 | 0.78731 | ↓ -0.345 |
| OXOGLUTARATE_neg_2             | 0.12359       | 0.96989  | 1.1526  | ↑ 0.2049 | 0.25672       | 0.77754 | 1.208   | ↑ 0.2726 | 0.87528       | 0.99234 | 1.0409  | ↑ 0.0578 | 0.043903      | 0.55845 | 1.3645  | ↑ 0.4484 |
| CE182                          | 0.13573       | 0.96989  | 0.8103  | ↓ -0.303 | 0.11927       | 0.72412 | 0.76512 | ↓ -0.386 | 0.55704       | 0.94319 | 0.88953 | ↓ -0.169 | 0.006022      | 0.42218 | 0.65944 | ↓ -0.601 |
| NORMETANEPHRINE_pos_1          | 0.1857        | 0.96989  | 0.87244 | ↓ -0.197 | 0.16723       | 0.72412 | 0.78674 | ↓ -0.346 | 0.44919       | 0.9283  | 0.89169 | ↓ -0.165 | 0.014653      | 0.52739 | 0.67664 | ↓ -0.564 |
| ASCORBATE_neg_2                | 0.20445       | 0.96989  | 0.84866 | ↓ -0.237 | 0.92254       | 0.9716  | 1.0032  | ↑ 0.0046 | 0.42125       | 0.92598 | 1.1697  | ↑ 0.2261 | 0.041969      | 0.55845 | 0.75285 | ↓ -0.41  |
| ACETYL-COA_pos_1               | 0.2095        | 0.96989  | 1.782   | ↑ 0.8335 | 0.001595      | 0.14065 | 2.6904  | ↑ 1.4278 | 0.080836      | 0.67363 | 1.7843  | ↑ 0.8353 | 0.001346      | 0.21242 | 2.8012  | ↑ 1.486  |
| N-GLYCYL-L-PROLINE_neg_3       | 0.24586       | 0.96989  | 0.31441 | ↓ -1.669 | 0.47972       | 0.8616  | 0.27759 | ↓ -1.849 | 0.43559       | 0.92598 | 0.18999 | ↓ -2.396 | 0.004664      | 0.42218 | 0.12578 | ↓ -2.991 |
| AMINOADIPATE_pos_1             | 0.24666       | 0.96989  | 0.89071 | ↓ -0.167 | 0.41369       | 0.83033 | 0.91154 | ↓ -0.134 | 0.83263       | 0.99234 | 1.04    | ↑ 0.0566 | 0.029949      | 0.55845 | 0.77834 | ↓ -0.362 |
| L-CARNITINE_pos_1              | 0.28883       | 0.96989  | 1.0836  | ↑ 0.1159 | 0.47332       | 0.85601 | 0.75408 | ↓ -0.407 | 0.15478       | 0.77388 | 1.5723  | ↑ 0.6528 | 0.040165      | 0.55845 | 0.44975 | ↓ -1.153 |
| CE226                          | 0.29835       | 0.96989  | 0.88425 | ↓ -0.177 | 0.000218      | 0.09259 | 0.21171 | ↓ -2.24  | 0.008059      | 0.42014 | 0.28761 | ↓ -1.798 | 0.000577      | 0.21242 | 0.48516 | ↓ -1.044 |
| TAG566-FA225                   | 0.30452       | 0.96989  | 1.2772  | ↑ 0.353  | 0.001203      | 0.14065 | 1.274   | ↑ 0.3493 | 0.018851      | 0.42014 | 1.1584  | ↑ 0.2122 | 0.009319      | 0.42218 | 1.4434  | ↑ 0.5295 |
| GERANYL-PP_HPO3_neg_2          | 0.32477       | 0.96989  | 0.92396 | ↓ -0.114 | 0.19613       | 0.72412 | 0.83987 | ↓ -0.252 | 0.50159       | 0.94319 | 0.95256 | ↓ -0.07  | 0.035634      | 0.55845 | 0.73685 | ↓ -0.441 |
| TAG544-FA224                   | 0.36504       | 0.96989  | 0.78541 | ↓ -0.348 | 0.19476       | 0.72412 | 0.87888 | ↓ -0.186 | 0.35404       | 0.92598 | 0.79328 | ↓ -0.334 | 0.036992      | 0.55845 | 0.77637 | ↓ -0.365 |
| ACETYLPHOSPHATE_pos_1          | 0.4256        | 0.96989  | 0.91278 | ↓ -0.132 | 0.28062       | 0.78188 | 0.84327 | ↓ -0.246 | 0.55967       | 0.94389 | 1.0701  | ↑ 0.0978 | 0.016132      | 0.52739 | 0.68804 | ↓ -0.539 |
| N-ACETYLPUTRESCINE_pos_1       | 0.46953       | 0.96989  | 0.87575 | ↓ -0.191 | 0.38661       | 0.82612 | 2.4572  | ↑ 1.297  | 0.76978       | 0.99234 | 0.88029 | ↓ -0.184 | 0.041408      | 0.55845 | 4.6865  | ↑ 2.2285 |
| TAG522-FA202                   | 0.56368       | 0.96989  | 1.4634  | ↑ 0.5494 | 0.014195      | 0.43092 | 2.5221  | ↑ 1.3346 | 0.13452       | 0.74113 | 1.8637  | ↑ 0.8982 | 0.029921      | 0.55845 | 3.0959  | ↑ 1.6303 |
| MESACONIC ACID_pos_1           | 0.67617       | 0.97467  | 0.94295 | ↓ -0.085 | 0.41895       | 0.83035 | 2.5946  | ↑ 1.3755 | 0.66652       | 0.99046 | 0.87071 | ↓ -0.2   | 0.036055      | 0.55845 | 5.2573  | ↑ 2.3943 |
| TAG565-FA181                   | 0.77568       | 0.98701  | 0.95426 | ↓ -0.068 | 0.50825       | 0.87452 | 2.611   | ↑ 1.3846 | 0.5512        | 0.94319 | 0.85212 | ↓ -0.231 | 0.03639       | 0.55845 | 5.4807  | ↑ 2.4544 |
| SPERMIDINE_pos_4               | 0.80345       | 0.98701  | 0.94868 | ↓ -0.076 | 0.46804       | 0.85576 | 2.5022  | ↑ 1.3232 | 0.6343        | 0.98776 | 0.8571  | ↓ -0.222 | 0.037697      | 0.55845 | 5.1752  | ↑ 2.3716 |
| TAG483-FA181                   | 0.82339       | 0.98701  | 0.53495 | ↓ -0.903 | 0.10879       | 0.72412 | 1.8258  | ↑ 0.8686 | 0.57998       | 0.9517  | 2.0303  | ↑ 1.0217 | 0.009438      | 0.42218 | 3.0733  | ↑ 1.6198 |
| TAG520-FA200                   | 0.84194       | 0.98847  | 1.2994  | ↑ 0.3779 | 0.10283       | 0.72412 | 1.5178  | ↑ 0.602  | 0.97062       | 0.99401 | 0.81463 | ↓ -0.296 | 0.02342       | 0.55845 | 2.2635  | ↑ 1.1786 |
| TAG501-FA140                   | 0.86499       | 0.99469  | 0.46526 | ↓ -1.104 | 0.56256       | 0.8992  | 2.1559  | ↑ 1.1083 | 0.74388       | 0.99234 | 1.0475  | ↑ 0.067  | 0.038272      | 0.55845 | 3.8055  | ↑ 1.9281 |
| ATROLACTIC ACID_neg_2          | 0.88295       | 0.99469  | 1.0218  | ↑ 0.0311 | 0.001655      | 0.14065 | 2.0271  | ↑ 1.0194 | 0.12827       | 0.74022 | 1.9495  | ↑ 0.9631 | 0.006677      | 0.42218 | 4.5883  | ↑ 2.198  |
| TAG582-FA181                   | 0.92289       | 0.99469  | 1.2488  | ↑ 0.3205 | 0.025904      | 0.53437 | 0.62916 | ↓ -0.669 | 0.73765       | 0.99234 | 0.97716 | ↓ -0.033 | 0.009934      | 0.42218 | 0.60856 | ↓ -0.717 |
| TAG527-FA160                   | 0.95573       | 0.99469  | 0.9806  | ↓ -0.028 | 0.33329       | 0.7915  | 1.1222  | ↑ 0.1663 | 0.56627       | 0.94632 | 0.96911 | ↓ -0.045 | 0.035824      | 0.55845 | 1.2806  | ↑ 0.3568 |
| TAG545-FA205                   | 0.98526       | 0.99469  | 0.8428  | ↓ -0.247 | 0.096232      | 0.72412 | 0.78908 | ↓ -0.342 | 0.35303       | 0.92598 | 0.75501 | ↓ -0.405 | 0.039263      | 0.55845 | 0.68059 | ↓ -0.555 |



Supplementary Table S2B. List of dysregulated metabolites for female, male, Wild type and APChi mice following exposure to 9.5 Gy of Gamma-radiation, 1 week post-irradiation showing phenotype dependent response of radiation.

|                             | 9.5Gy / 0.0Gy |         |         |          | 9.5Gy / 0.0Gy |          |         |          | 9.5Gy / 0.0Gy |         |         |          | 9.5Gy / 0.0Gy |          |         |          |
|-----------------------------|---------------|---------|---------|----------|---------------|----------|---------|----------|---------------|---------|---------|----------|---------------|----------|---------|----------|
|                             | Female        |         |         |          | Male          |          |         |          | WildType      |         |         |          | APChi         |          |         |          |
|                             |               |         |         |          | 1wk           |          |         |          |               |         |         |          |               |          |         |          |
| name                        | p-value       | FDR     | FC      | LOG2FC   | p-value       | FDR      | FC      | LOG2FC   | p-value       | FDR     | FC      | LOG2FC   | p-value       | FDR      | FC      | LOG2FC   |
| CE182                       | 0.19654       | 0.95194 | 1.5876  | 0.66684  | 2.22E-05      | 0.005935 | 1.8333  | 0.87441  | 0.002567      | 0.92112 | 1.6029  | 0.68071  | 0.012612      | 0.12705  | 1.7614  | 0.81673  |
| NORMETANEPHRINE_pos_1       | 0.12634       | 0.95194 | 1.997   | 0.99784  | 0.005353      | 0.27165  | 1.7693  | 0.82315  | 0.010437      | 0.92112 | 1.9158  | 0.93791  | 0.02484       | 0.17893  | 1.8933  | 0.92088  |
| GERANYL-PP_HPO3_neg_2       | 0.16098       | 0.95194 | 2.2096  | 1.1438   | 0.038224      | 0.52469  | 1.5625  | 0.64389  | 0.16872       | 0.92112 | 1.5095  | 0.59408  | 0.016303      | 0.14742  | 2.1295  | 1.0905   |
| N-ACETYLPUTRESCINE_pos_1    | 0.62544       | 0.97562 | 1.199   | 0.26179  | 0.92509       | 0.99     | 0.43651 | -1.1959  | 0.45355       | 0.93084 | 0.35468 | -1.4954  | 0.003508      | 0.053246 | 1.5209  | 0.60496  |
| TAG545-FA205                | 0.26551       | 0.95194 | 0.80639 | -0.31046 | 0.48448       | 0.89138  | 0.84306 | -0.2463  | 0.93486       | 0.98807 | 0.98919 | -0.01568 | 0.039781      | 0.21415  | 0.60095 | -0.73468 |
| TAG552-FA181                | 0.15672       | 0.95194 | 1.3565  | 0.4399   | 0.013503      | 0.37637  | 1.3897  | 0.47473  | 0.51066       | 0.96398 | 1.1516  | 0.20361  | 8.5E-05       | 0.01386  | 1.8644  | 0.89872  |
| TAG463-FA141                | 0.94525       | 0.98297 | 1.0198  | 0.028313 | 0.06138       | 0.63625  | 1.1956  | 0.25778  | 0.49013       | 0.95869 | 0.91846 | -0.12271 | 0.000234      | 0.019885 | 1.5125  | 0.59692  |
| TAG490-FA170                | 0.4378        | 0.97562 | 1.3302  | 0.41164  | 0.37964       | 0.89138  | 1.1109  | 0.15172  | 0.41911       | 0.92238 | 0.78797 | -0.34378 | 0.00116       | 0.043099 | 2.0637  | 1.0453   |
| ARGININOSUCCINIC ACID_neg_2 | 0.31223       | 0.95194 | 1.3902  | 0.47527  | 0.65892       | 0.93511  | 1.1219  | 0.16597  | 0.38522       | 0.92112 | 0.74409 | -0.42645 | 0.006836      | 0.085445 | 2.3279  | 1.219    |
| FFA141                      | 0.025203      | 0.95194 | 1.8226  | 0.86599  | 0.22707       | 0.89138  | 1.1687  | 0.22492  | 0.44024       | 0.93084 | 1.1161  | 0.15844  | 0.002169      | 0.046168 | 1.69    | 0.75704  |
| TAG514-FA161                | 0.12231       | 0.95194 | 1.3641  | 0.44798  | 0.032234      | 0.50675  | 1.2872  | 0.36426  | 0.69001       | 0.96398 | 1.0504  | 0.070896 | 6.72E-05      | 0.01386  | 1.8487  | 0.88651  |
| FFA226                      | 0.1411        | 0.95194 | 1.2453  | 0.31644  | 0.89919       | 0.99     | 1.0091  | 0.013126 | 0.82641       | 0.9749  | 0.95752 | -0.06263 | 0.010081      | 0.11275  | 1.2724  | 0.34755  |
| FFA181                      | 0.1407        | 0.95194 | 2.0616  | 1.0438   | 0.45316       | 0.89138  | 1.4112  | 0.4969   | 0.5564        | 0.96398 | 1.1905  | 0.25158  | 0.009306      | 0.10952  | 2.1891  | 1.1303   |
| TAG461-FA140                | 0.89376       | 0.98297 | 0.93884 | -0.09104 | 0.11983       | 0.76624  | 0.75255 | -0.41015 | 0.88656       | 0.98395 | 1.0577  | 0.080923 | 0.019451      | 0.15598  | 0.58896 | -0.76375 |
| TAG567-FA204                | 0.70298       | 0.98297 | 1.1656  | 0.22109  | 0.74006       | 0.95402  | 1.0677  | 0.094497 | 0.38541       | 0.92112 | 0.83649 | -0.25759 | 0.015138      | 0.13987  | 1.5591  | 0.64071  |
| TAG501-FA181                | 0.68307       | 0.97562 | 1.007   | 0.010026 | 0.31185       | 0.89138  | 0.71358 | -0.48685 | 0.73441       | 0.96398 | 0.85568 | -0.22486 | 0.048475      | 0.23411  | 0.60267 | -0.73055 |
| FFA205                      | 0.26217       | 0.95194 | 1.2094  | 0.27424  | 0.66228       | 0.93511  | 1.0283  | 0.040261 | 0.86094       | 0.98395 | 0.96704 | -0.04836 | 0.028798      | 0.1974   | 1.266   | 0.34031  |
| TAG440-FA140                | 0.087808      | 0.95194 | 0.59365 | -0.75232 | 0.071834      | 0.69389  | 0.81494 | -0.29524 | 0.32235       | 0.92112 | 0.82381 | -0.27962 | 0.011139      | 0.12139  | 0.63699 | -0.65065 |
| SM261                       | 0.21453       | 0.95194 | 1.2449  | 0.31601  | 0.94399       | 0.99     | 0.99083 | -0.01329 | 0.90114       | 0.98395 | 0.93605 | -0.09534 | 0.028415      | 0.1974   | 1.2763  | 0.35192  |
| TAG511-FA150                | 0.15725       | 0.95194 | 0.75597 | -0.40361 | 0.097474      | 0.76624  | 0.75882 | -0.39818 | 0.94089       | 0.95869 | 1.1615  | 0.21604  | 0.000894      | 0.042231 | 0.48903 | -1.032   |
| TAG525-FA225                | 0.2332        | 0.95194 | 1.279   | 0.35502  | 0.10256       | 0.76624  | 1.3061  | 0.38525  | 0.26885       | 0.92112 | 1.2184  | 0.285    | 0.021742      | 0.16217  | 1.594   | 0.67261  |
| TAG544-FA180                | 0.83779       | 0.98297 | 0.82655 | -0.27483 | 0.10889       | 0.76624  | 0.70325 | -0.50789 | 0.8524        | 0.98176 | 1.0169  | 0.024244 | 0.026412      | 0.18709  | 0.51447 | -0.95883 |
| TAG512-FA181                | 0.051674      | 0.95194 | 1.5059  | 0.59065  | 0.26548       | 0.89138  | 1.1192  | 0.16252  | 0.66082       | 0.96398 | 1.0259  | 0.03686  | 0.003001      | 0.049048 | 1.5786  | 0.65869  |
| TAG542-FA202                | 0.84996       | 0.98297 | 0.95955 | -0.05957 | 0.44436       | 0.89138  | 0.81604 | -0.29329 | 0.36504       | 0.92112 | 1.1405  | 0.18961  | 0.041026      | 0.21415  | 0.63564 | -0.65372 |
| CE161                       | 0.21781       | 0.95194 | 0.60396 | -0.72748 | 0.079505      | 0.71893  | 0.78051 | -0.35751 | 0.72329       | 0.96398 | 0.88388 | -0.17807 | 0.004979      | 0.067646 | 0.56886 | -0.81386 |
| TAG564-FA181                | 0.9732        | 0.98479 | 0.99605 | -0.00571 | 0.033386      | 0.50675  | 1.3354  | 0.41732  | 0.92647       | 0.98807 | 1.0631  | 0.088231 | 0.007266      | 0.088233 | 1.6003  | 0.67831  |
| TAG531-FA181                | 0.21673       | 0.95194 | 0.55671 | -0.84499 | 0.04322       | 0.55662  | 0.80671 | -0.30988 | 0.58561       | 0.96398 | 0.80096 | -0.3202  | 0.001217      | 0.043099 | 0.55469 | -0.85024 |
| TAG461-FA161                | 0.20897       | 0.95194 | 1.2986  | 0.37693  | 0.41979       | 0.89138  | 1.0472  | 0.066481 | 0.70164       | 0.96398 | 0.86884 | -0.20283 | 0.001017      | 0.043099 | 1.6126  | 0.68942  |
| TAG490-FA180                | 0.085391      | 0.95194 | 1.3573  | 0.44069  | 0.33249       | 0.89138  | 1.3416  | 0.42394  | 0.55754       | 0.96398 | 1.171   | 0.22773  | 0.036262      | 0.21405  | 1.6975  | 0.76342  |
| TAG491-FA181                | 0.19881       | 0.95194 | 1.3391  | 0.42128  | 0.15352       | 0.85739  | 1.1263  | 0.17156  | 0.99161       | 0.99785 | 0.90226 | -0.14838 | 0.000615      | 0.041618 | 1.7743  | 0.82725  |
| MALONYL-COA_pos_1           | 0.67405       | 0.97562 | 1.1698  | 0.2262   | 0.5881        | 0.89995  | 1.0925  | 0.12765  | 0.49709       | 0.96398 | 0.8125  | -0.29956 | 0.01702       | 0.14762  | 1.7394  | 0.79861  |
| TAG512-FA150                | 0.63928       | 0.97562 | 1.1011  | 0.13896  | 0.058366      | 0.63604  | 1.1887  | 0.24943  | 0.94686       | 0.98807 | 1.027   | 0.038379 | 0.011847      | 0.12588  | 1.388   | 0.47305  |
| TAG562-FA160                | 0.45778       | 0.97562 | 1.3567  | 0.4401   | 0.72393       | 0.9445   | 1.0737  | 0.10256  | 0.41022       | 0.92238 | 0.78628 | -0.34689 | 0.012854      | 0.12705  | 1.9691  | 0.97757  |
| TAG470-FA170                | 0.91195       | 0.98297 | 1.0502  | 0.070687 | 0.25563       | 0.89138  | 1.1451  | 0.19544  | 0.75325       | 0.96398 | 0.86492 | -0.20936 | 0.034912      | 0.20995  | 1.6522  | 0.72439  |
| TAG511-FA181                | 0.71411       | 0.98297 | 1.0607  | 0.084957 | 0.008339      | 0.27531  | 1.4857  | 0.57117  | 0.98419       | 0.99666 | 1.1276  | 0.17323  | 0.002376      | 0.046168 | 1.9054  | 0.93012  |
| TAG546-FA183                | 0.2027        | 0.95194 | 1.285   | 0.36173  | 0.25248       | 0.89138  | 1.1028  | 0.14114  | 0.72117       | 0.96398 | 0.88522 | -0.17589 | 9.78E-05      | 0.01386  | 1.689   | 0.75617  |
| TAG501-FA161                | 0.98255       | 0.9902  | 1.0921  | 0.12704  | 0.82209       | 0.97366  | 0.99006 | -0.01441 | 0.14774       | 0.92112 | 0.71556 | -0.48286 | 0.048207      | 0.23411  | 1.6752  | 0.74436  |
| FFA161                      | 0.34596       | 0.95726 | 1.205   | 0.269    | 0.14291       | 0.80983  | 1.1232  | 0.16763  | 0.5516        | 0.96398 | 1.0611  | 0.085556 | 0.04242       | 0.21462  | 1.2973  | 0.37554  |
| TAG545-FA225                | 0.094699      | 0.95194 | 2.3398  | 1.2264   | 0.048962      | 0.59454  | 1.4705  | 0.55634  | 0.23351       | 0.92112 | 1.5242  | 0.60808  | 0.034991      | 0.20995  | 2.1497  | 1.1041   |
| FFA204                      | 0.68231       | 0.97562 | 0.75982 | -0.39628 | 0.7741        | 0.97247  | 1.0417  | 0.058889 | 0.074498      | 0.92112 | 0.61106 | -0.71061 | 0.047034      | 0.23244  | 1.5248  | 0.60863  |
| BUTYRYL-COA_pos_1           | 0.94342       | 0.98297 | 0.67544 | -0.5661  | 0.020173      | 0.37637  | 1.7709  | 0.82447  | 0.47943       | 0.95214 | 1.0477  | 0.067207 | 0.013829      | 0.13061  | 2.1907  | 1.1314   |
| TAG492-FA160                | 0.080576      | 0.95194 | 1.436   | 0.52205  | 0.34592       | 0.89138  | 1.0779  | 0.10817  | 0.76489       | 0.97038 | 0.99538 | -0.00669 | 0.013194      | 0.12744  | 1.5004  | 0.58539  |
| TAG400-FA160                | 0.090349      | 0.95194 | 0.56763 | -0.81697 | 0.75538       | 0.95832  | 1.0868  | 0.12007  | 0.9477        | 0.98807 | 0.96797 | -0.04696 | 0.040526      | 0.21415  | 0.66118 | -0.59689 |
| TAG502-FA161                | 0.23918       | 0.95194 | 0.7833  | -0.35235 | 0.18129       | 0.89138  | 0.88833 | -0.17083 | 0.79384       | 0.9749  | 0.92171 | -0.11761 | 0.002077      | 0.046168 | 0.7204  | -0.47313 |
| TAG491-FA160                | 0.27562       | 0.95194 | 1.2376  | 0.30758  | 0.40795       | 0.89138  | 1.0511  | 0.07188  | 0.65015       | 0.96398 | 0.84543 | -0.24224 | 0.002755      | 0.04683  | 1.6498  | 0.72229  |
| TAG555-FA182                | 0.66959       | 0.97562 | 0.68043 | -0.55548 | 0.62128       | 0.91862  | 1.0515  | 0.072463 | 0.090554      | 0.92112 | 0.57055 | -0.80958 | 0.037987      | 0.21415  | 1.5243  | 0.60815  |
| TAG500-FA140                | 0.20078       | 0.95194 | 1.2491  | 0.32084  | 0.46118       | 0.89138  | 1.0787  | 0.10934  |               |         |         |          |               |          |         |          |

Supplementary Table S2C. List of dysregulated metabolites for female, male, Wild type and APChi mice following exposure to 9.5 Gy of Gamma-radiation, 1 month post-irradiation showing phenotype dependent response of radiation.

|                             | 9.5Gy / 0.0Gy |         |         |          | 9.5Gy / 0.0Gy |         |         |          | 9.5Gy / 0.0Gy |          |         |          | 9.5Gy / 0.0Gy |         |         |          |
|-----------------------------|---------------|---------|---------|----------|---------------|---------|---------|----------|---------------|----------|---------|----------|---------------|---------|---------|----------|
|                             | Female        |         |         |          | Male          |         |         |          | WildType      |          |         |          | APChi         |         |         |          |
|                             |               |         |         |          | 1mo           |         |         |          |               |          |         |          |               |         |         |          |
| name                        | p-value       | FDR     | FC      | LOG2FC   | p-value       | FDR     | FC      | LOG2FC   | p-value       | FDR      | FC      | LOG2FC   | p-value       | FDR     | FC      | LOG2FC   |
| ASCORBATE_neg_2             | 0.10102       | 0.89093 | 0.80214 | -0.31807 | 0.017433      | 0.324   | 0.42884 | -1.2215  | 0.072301      | 0.22594  | 0.43997 | -1.1845  | 0.00514       | 0.16803 | 0.47959 | -1.0601  |
| TAG566-FA225                | 0.43322       | 0.99953 | 0.71244 | -0.48915 | 0.22305       | 0.64952 | 0.6245  | -0.67923 | 0.90521       | 0.94062  | 0.65659 | -0.60694 | 0.039781      | 0.26836 | 0.62067 | -0.6881  |
| TAG544-FA224                | 0.013325      | 0.62598 | 0.38637 | -1.372   | 0.21399       | 0.64834 | 1.1608  | 0.2151   | 0.028438      | 0.12722  | 1.7612  | 0.81652  | 0.043448      | 0.27978 | 0.57725 | -0.79274 |
| TAG501-FA140                | 0.31908       | 0.99215 | 1.2734  | 0.34868  | 0.50791       | 0.81765 | 1.1789  | 0.23747  | 0.56211       | 0.76038  | 0.9058  | -0.14274 | 0.032673      | 0.25181 | 1.5252  | 0.60904  |
| ATROLACTIC ACID_neg_2       | 0.65053       | 0.99953 | 1.188   | 0.24851  | 0.005527      | 0.24745 | 2.1122  | 1.0788   | 0.17951       | 0.38532  | 2.0219  | 1.0157   | 0.020336      | 0.22709 | 1.6913  | 0.75809  |
| TAG483-FA182                | 0.5075        | 0.99953 | 1.121   | 0.1648   | 0.43582       | 0.78215 | 0.77479 | -0.36812 | 0.003112      | 0.045599 | 0.447   | -1.1616  | 0.004866      | 0.16803 | 1.4046  | 0.49012  |
| TAG521-FA201                | 0.002293      | 0.46622 | 0.54014 | -0.88858 | 0.3504        | 0.73321 | 0.90501 | -0.144   | 0.52748       | 0.73853  | 0.95037 | -0.07343 | 0.023405      | 0.22824 | 0.64953 | -0.62254 |
| TAG521-FA161                | 0.008581      | 0.61582 | 0.58627 | -0.77035 | 0.82358       | 0.94791 | 0.94416 | -0.08289 | 0.55515       | 0.75896  | 1.0883  | 0.12206  | 0.021283      | 0.22709 | 0.64927 | -0.62311 |
| TAG442-FA182                | 0.77211       | 0.99953 | 1.1856  | 0.24567  | 0.051775      | 0.43146 | 1.5234  | 0.60733  | 0.84973       | 0.90059  | 1.3354  | 0.41727  | 0.015674      | 0.22433 | 1.6437  | 0.71693  |
| ADP_pos_1                   | 0.070854      | 0.87596 | 2.6794  | 1.4219   | 0.000562      | 0.1195  | 1.9971  | 0.99788  | 0.031983      | 0.1373   | 1.7857  | 0.8365   | 0.002066      | 0.16803 | 2.6607  | 1.4118   |
| TAG564-FA204                | 0.2361        | 0.985   | 0.65622 | -0.60774 | 0.23881       | 0.64952 | 1.1224  | 0.16665  | 0.001354      | 0.034775 | 3.1709  | 1.6649   | 0.036086      | 0.25181 | 0.46537 | -1.1035  |
| IMIDAZOLE_pos_1             | 0.14906       | 0.91055 | 1.6868  | 0.75432  | 0.058087      | 0.4396  | 1.8301  | 0.87188  | 0.23953       | 0.47794  | 1.9621  | 0.97243  | 0.038326      | 0.26272 | 1.6514  | 0.72365  |
| TAG442-FA181                | 0.63393       | 0.99953 | 1.5932  | 0.67192  | 0.033603      | 0.39891 | 1.8674  | 0.901    | 0.37291       | 0.59582  | 2.2594  | 1.176    | 0.016784      | 0.22709 | 1.8858  | 0.91516  |
| MEVALONOLACTONE_pos_2       | 0.30637       | 0.99215 | 1.7333  | 0.79351  | 0.065133      | 0.4396  | 1.2557  | 0.32846  | 0.29072       | 0.53798  | 1.147   | 0.19792  | 0.044569      | 0.28157 | 1.6942  | 0.7606   |
| ARGININOSUCCINIC ACID_neg_2 | 0.26838       | 0.99215 | 0.77934 | -0.35967 | 0.12339       | 0.52084 | 0.6823  | -0.55152 | 0.60797       | 0.77209  | 0.91698 | -0.12504 | 0.021275      | 0.22709 | 0.48504 | -1.0438  |
| TAG482-FA140                | 0.18478       | 0.93892 | 1.1706  | 0.22727  | 0.59814       | 0.86173 | 0.74683 | -0.42114 | 0.004937      | 0.053803 | 0.45983 | -1.1208  | 0.013453      | 0.21636 | 1.3345  | 0.41625  |
| TAG482-FA141                | 0.26537       | 0.99215 | 1.1889  | 0.24961  | 0.54318       | 0.83754 | 0.78394 | -0.35118 | 0.000847      | 0.034775 | 0.48689 | -1.0383  | 0.013341      | 0.21636 | 1.3724  | 0.45672  |
| TAG562-FA180                | 0.6052        | 0.99953 | 0.77675 | -0.36447 | 0.54058       | 0.83754 | 1.0921  | 0.12705  | 0.002092      | 0.035955 | 2.2509  | 1.1705   | 0.042297      | 0.27926 | 0.62181 | -0.68546 |
| TAG461-FA181                | 0.43465       | 0.99953 | 1.3549  | 0.43813  | 0.46831       | 0.80341 | 1.212   | 0.27735  | 0.36392       | 0.58809  | 0.91781 | -0.12374 | 0.008292      | 0.21636 | 1.6365  | 0.71059  |
| TAG441-FA160                | 0.75018       | 0.99953 | 1.0934  | 0.12888  | 0.1164        | 0.52084 | 1.2605  | 0.33403  | 0.79164       | 0.86714  | 1.0595  | 0.083383 | 0.019462      | 0.22709 | 1.4253  | 0.51122  |
| TAG462-FA181                | 0.55263       | 0.99953 | 1.2705  | 0.34535  | 0.39175       | 0.77005 | 1.2649  | 0.33901  | 0.52827       | 0.73853  | 1.0454  | 0.064023 | 0.024603      | 0.22824 | 1.5518  | 0.63396  |
| TAG461-FA140                | 0.3954        | 0.99953 | 1.23    | 0.29865  | 0.92735       | 0.96836 | 0.88873 | -0.17018 | 0.009001      | 0.065952 | 0.56313 | -0.82845 | 0.007165      | 0.20301 | 1.4581  | 0.54406  |
| TAG441-FA140                | 0.7056        | 0.99953 | 1.1081  | 0.14806  | 0.90667       | 0.96389 | 0.93344 | -0.09937 | 0.052903      | 0.18271  | 0.5987  | -0.7401  | 0.047972      | 0.29114 | 1.4095  | 0.49517  |
| TAG461-FA120                | 0.67734       | 0.99953 | 1.1695  | 0.22593  | 0.26607       | 0.65908 | 1.1774  | 0.23557  | 0.41181       | 0.61838  | 0.87164 | -0.19819 | 0.015734      | 0.22433 | 1.5204  | 0.60445  |
| 4-IMIDAZOLEACETATE_pos_1    | 0.19472       | 0.93892 | 0.83161 | -0.26603 | 0.018296      | 0.324   | 0.75054 | -0.41399 | 0.34777       | 0.58192  | 0.95413 | -0.06774 | 0.000904      | 0.16803 | 0.49723 | -1.008   |
| URIDINE 5-DIPHOSPHATE_neg_2 | 0.10802       | 0.89093 | 0.76587 | -0.38482 | 0.1811        | 0.61953 | 0.68804 | -0.53945 | 0.57834       | 0.76365  | 0.90307 | -0.14709 | 0.029798      | 0.24396 | 0.52661 | -0.92519 |
| TAG461-FA160                | 0.51914       | 0.99953 | 1.1658  | 0.22133  | 0.87557       | 0.95387 | 0.92565 | -0.11146 | 0.008948      | 0.065952 | 0.59278 | -0.75444 | 0.005126      | 0.16803 | 1.4423  | 0.52838  |
| 4-AMINOBENZOIC ACID_pos_1   | 0.82134       | 0.99953 | 0.82747 | -0.27322 | 0.018202      | 0.324   | 0.60309 | -0.72956 | 0.062816      | 0.2029   | 0.68457 | -0.54672 | 0.029062      | 0.24396 | 0.57532 | -0.79756 |
| TAG482-FA181                | 0.38862       | 0.99953 | 1.1812  | 0.24026  | 0.7861        | 0.93401 | 0.86056 | -0.21665 | 0.014609      | 0.083905 | 0.52439 | -0.93127 | 0.003703      | 0.16803 | 1.4681  | 0.55393  |
| DAG160/182                  | 0.11739       | 0.89093 | 0.85072 | -0.23325 | 0.6817        | 0.90614 | 0.97696 | -0.03364 | 0.31416       | 0.55402  | 1.1982  | 0.26085  | 0.027738      | 0.24396 | 0.75479 | -0.40586 |
| TAG589-FA226                | 0.92116       | 0.99953 | 0.90625 | -0.14202 | 0.1042        | 0.52084 | 0.57014 | -0.81061 | 0.55493       | 0.75896  | 1.2117  | 0.27702  | 0.021245      | 0.22709 | 0.48768 | -1.036   |
| TAG564-FA181                | 0.31246       | 0.99215 | 0.73698 | -0.4403  | 0.11432       | 0.52084 | 0.65238 | -0.61623 | 0.63841       | 0.79903  | 1.0077  | 0.011001 | 0.036142      | 0.25181 | 0.48473 | -1.0447  |
| TAG481-FA141                | 0.18956       | 0.93892 | 1.369   | 0.45314  | 0.60427       | 0.86553 | 0.89095 | -0.16658 | 0.10062       | 0.27066  | 0.66906 | -0.57979 | 0.015835      | 0.22433 | 1.382   | 0.46673  |
| TAG441-FA181                | 0.53218       | 0.99953 | 1.4642  | 0.55014  | 0.12262       | 0.52084 | 1.6096  | 0.68673  | 0.60714       | 0.77209  | 1.706   | 0.77061  | 0.022441      | 0.22709 | 1.7543  | 0.81086  |
| TAG472-FA140                | 0.72793       | 0.99953 | 1.0979  | 0.13478  | 0.9437        | 0.97585 | 0.80116 | -0.31984 | 0.023653      | 0.11047  | 0.45642 | -1.1316  | 0.03604       | 0.25181 | 1.4159  | 0.50168  |
| TAG482-FA160                | 0.19548       | 0.93892 | 1.1646  | 0.21985  | 0.36036       | 0.73668 | 0.75628 | -0.403   | 0.002115      | 0.035955 | 0.4807  | -1.0568  | 0.013378      | 0.21636 | 1.2979  | 0.37618  |
| TAG491-FA181                | 0.29069       | 0.99215 | 1.1251  | 0.17002  | 0.49732       | 0.8154  | 0.8104  | -0.3033  | 0.001051      | 0.034775 | 0.54482 | -0.87614 | 0.045051      | 0.28157 | 1.2412  | 0.31172  |
| TAG553-FA181                | 0.020484      | 0.66968 | 0.67082 | -0.576   | 0.56062       | 0.84263 | 0.89498 | -0.16007 | 0.94752       | 0.96324  | 0.97888 | -0.0308  | 0.024704      | 0.22824 | 0.73457 | -0.44503 |
| TAG421-FA181                | 0.82449       | 0.99953 | 1.3086  | 0.38807  | 0.014703      | 0.31736 | 1.951   | 0.96425  | 0.12772       | 0.31929  | 2.6259  | 1.3928   | 0.026828      | 0.24259 | 1.7626  | 0.8177   |
| TAG421-FA140                | 0.24058       | 0.99215 | 1.2902  | 0.3676   | 0.63726       | 0.89385 | 1.1077  | 0.14752  | 0.94964       | 0.96324  | 0.97972 | -0.02955 | 0.046518      | 0.28652 | 1.3655  | 0.44939  |
| TAG547-FA183                | 0.27741       | 0.99215 | 0.75049 | -0.41409 | 0.84732       | 0.95387 | 0.68328 | -0.54945 | 0.11532       | 0.30253  | 1.8631  | 0.89772  | 0.035988      | 0.25181 | 0.53533 | -0.90151 |
| TAG525-FA181                | 0.031602      | 0.7334  | 0.72885 | -0.45631 | 0.87845       | 0.95387 | 0.94833 | -0.07654 | 0.27187       | 0.52047  | 1.0778  | 0.10813  | 0.029304      | 0.24396 | 0.78707 | -0.34543 |
| TAG587-FA182                | 0.98999       | 0.99953 | 0.8169  | -0.29176 | 0.83905       | 0.95092 | 0.93749 | -0.09313 | 0.006324      | 0.062783 | 1.7736  | 0.8267   | 0.04271       | 0.27926 | 0.56344 | -0.82767 |
| TAG561-FA181                | 0.096902      | 0.89093 | 0.82006 | -0.28621 | 0.38894       | 0.77005 | 1.0393  | 0.055651 | 0.007234      | 0.062783 | 1.3749  | 0.45938  | 0.018115      | 0.22709 | 0.81571 | -0.29387 |
| INDOLEACRYLIC ACID_pos_1    | 0.20204       | 0.93892 | 4.1684  | 2.0595   | 0.1534        | 0.58736 | 2.8101  | 1.4906   | 0.27954       | 0.53038  | 3.4807  | 1.7994   | 0.035929      | 0.25181 | 3.9306  | 1.9748   |
| TAG481-FA180                | 0.53147       | 0.99953 | 1.1745  | 0.23211  | 0.062462      | 0.4396  | 1.2689  | 0.34358  | 0.86507       | 0.91004  | 1.0167  | 0.023896 | 0.011844      | 0.21636 | 1.4907  | 0.57597  |
| TAG543-FA183                | 0.011421      | 0.62598 | 0.33658 | -1.571   | 0.23825       | 0.64952 | 1.1289  | 0.17495  | 0.020686      | 0.10105  | 1.7908  | 0.84058  | 0.012534      | 0.21636 | 0.44998 | -1.1521  |
| METHIONINE_pos_1            | 0.22582       | 0.95973 | 0.70949 | -0.49515 | 0.2576        | 0.65557 | 0.77848 | -0.36127 | 0.90009       | 0.93759  | 0.93371 | -0.09896 | 0.013728      | 0.21636 | 0.53885 | -0.89205 |
| TAG546-FA181                | 0.12779       | 0.91055 | 0.76907 | -0.37882 | 0.42839       |         |         |          |               |          |         |          |               |         |         |          |



Supplementary Table S2D. List of dysregulated metabolites for female, male, Wild type and APChi mice following exposure to 9.5 Gy of Gamma-radiation, 3 months post-irradiation showing phenotype dependent response of radiation.

|                           | 9.5Gy / 0.0Gy |          |         |          | 9.5Gy / 0.0Gy |         |         |          | 9.5Gy / 0.0Gy |         |         |          | 9.5Gy / 0.0Gy |         |         |          |
|---------------------------|---------------|----------|---------|----------|---------------|---------|---------|----------|---------------|---------|---------|----------|---------------|---------|---------|----------|
|                           | Female        |          |         |          | Male          |         |         |          | WildType      |         |         |          | APChi         |         |         |          |
|                           |               |          |         |          | 3mo           |         |         |          |               |         |         |          |               |         |         |          |
| name                      | p-value       | FDR      | FC      | LOG2FC   | p-value       | FDR     | FC      | LOG2FC   | p-value       | FDR     | FC      | LOG2FC   | p-value       | FDR     | FC      | LOG2FC   |
| CYSTEINE_neg_5            | 0.14091       | 0.33558  | 1.3473  | 0.43009  | 0.000531      | 0.22564 | 6.3248  | 2.661    | 0.068388      | 0.80329 | 3.534   | 1.8213   | 0.018044      | 0.31888 | 2.0079  | 1.0057   |
| CE226                     | 0.006099      | 0.1372   | 2.7635  | 1.4665   | 0.024579      | 0.99441 | 1.7456  | 0.80376  | 0.20003       | 0.80329 | 1.4064  | 0.49198  | 0.004002      | 0.28348 | 2.9239  | 1.5479   |
| TAG522-FA202              | 0.21117       | 0.40795  | 1.6024  | 0.6802   | 0.25046       | 0.99441 | 1.323   | 0.4038   | 0.89065       | 0.97744 | 1.0949  | 0.13082  | 0.026206      | 0.33448 | 1.8093  | 0.85544  |
| TAG565-FA181              | 0.00351       | 0.13256  | 0.15593 | -2.681   | 0.1959        | 0.99441 | 0.77464 | -0.3684  | 0.033546      | 0.80329 | 0.22613 | -2.1448  | 0.042853      | 0.33448 | 0.24502 | -2.029   |
| TAG582-FA181              | 0.006539      | 0.1372   | 0.19481 | -2.3599  | 0.53628       | 0.99441 | 1.0416  | 0.058736 | 0.80528       | 0.95886 | 0.49193 | -1.0235  | 0.012692      | 0.31888 | 0.31193 | -1.6807  |
| TAG568-FA205              | 0.15318       | 0.35191  | 0.80456 | -0.31373 | 0.36274       | 0.99441 | 0.93073 | -0.10356 | 0.96321       | 0.9936  | 1.2176  | 0.28402  | 0.017164      | 0.31888 | 0.61947 | -0.6909  |
| FFA201                    | 0.2469        | 0.44582  | 1.215   | 0.28093  | 0.45424       | 0.99441 | 1.1731  | 0.23037  | 0.65266       | 0.90034 | 0.94045 | -0.08857 | 0.01379       | 0.31888 | 1.4531  | 0.53912  |
| FFA182                    | 0.10256       | 0.28678  | 1.3037  | 0.38263  | 0.39516       | 0.99441 | 1.1495  | 0.20096  | 0.89143       | 0.97744 | 0.98237 | -0.02566 | 0.005577      | 0.31888 | 1.4559  | 0.54187  |
| FFA141                    | 0.1825        | 0.38685  | 1.2649  | 0.339    | 0.25313       | 0.99441 | 1.2098  | 0.27471  | 0.74617       | 0.94946 | 0.90843 | -0.13856 | 0.018246      | 0.31888 | 1.5035  | 0.5883   |
| TAG482-FA140              | 0.071362      | 0.23511  | 0.71496 | -0.48406 | 0.39798       | 0.99441 | 0.93302 | -0.10002 | 0.50219       | 0.88561 | 0.91171 | -0.13336 | 0.037483      | 0.33448 | 0.75235 | -0.41053 |
| FFA181                    | 0.13068       | 0.32113  | 1.2777  | 0.35353  | 0.39229       | 0.99441 | 1.1426  | 0.19236  | 0.85525       | 0.96928 | 0.9684  | -0.04633 | 0.017773      | 0.31888 | 1.4212  | 0.50709  |
| FFA205                    | 0.16276       | 0.36793  | 1.3744  | 0.45878  | 0.41245       | 0.99441 | 1.2073  | 0.27177  | 0.65117       | 0.90034 | 0.96734 | -0.0479  | 0.012472      | 0.31888 | 1.559   | 0.64062  |
| TAG525-FA161              | 0.012458      | 0.1372   | 0.12542 | -2.9951  | 0.19941       | 0.99441 | 0.83313 | -0.26339 | 0.12345       | 0.80329 | 0.20356 | -2.2965  | 0.016136      | 0.31888 | 0.23971 | -2.0606  |
| 4-AMINOBENZOIC ACID_pos_1 | 0.13333       | 0.32566  | 0.62746 | -0.67241 | 0.62694       | 0.99441 | 0.68557 | -0.54462 | 0.49257       | 0.8833  | 1.0674  | 0.094129 | 0.010325      | 0.31888 | 0.45874 | -1.1242  |
| DAG181/226                | 0.12035       | 0.30627  | 1.4824  | 0.56792  | 0.87147       | 0.99441 | 1.0055  | 0.007969 | 0.66358       | 0.90034 | 0.9674  | -0.04781 | 0.023962      | 0.33448 | 1.3673  | 0.45138  |
| TAG502-FA181              | 0.033249      | 0.15925  | 0.58347 | -0.77728 | 0.39331       | 0.99441 | 0.92079 | -0.11905 | 0.45153       | 0.87228 | 0.81041 | -0.30327 | 0.014255      | 0.31888 | 0.65462 | -0.61126 |
| TAG511-FA181              | 0.26252       | 0.46488  | 0.90332 | -0.14669 | 0.61086       | 0.99441 | 0.95895 | -0.06047 | 0.88451       | 0.97744 | 1.03    | 0.042672 | 0.01522       | 0.31888 | 0.85174 | -0.23151 |
| TAG532-FA181              | 0.36854       | 0.59049  | 1.1639  | 0.21892  | 0.91983       | 0.99441 | 1.0119  | 0.017059 | 0.38832       | 0.87102 | 0.92335 | -0.11505 | 0.04621       | 0.33448 | 1.2231  | 0.29054  |
| HCER201                   | 0.014677      | 0.1372   | 5.6808  | 2.5061   | 0.2352        | 0.99441 | 1.4581  | 0.54408  | 0.79978       | 0.95886 | 1.499   | 0.584    | 0.002748      | 0.23372 | 3.1023  | 1.6333   |
| FFA204                    | 0.46728       | 0.66904  | 1.1156  | 0.15781  | 0.62314       | 0.99441 | 1.1533  | 0.20577  | 0.41734       | 0.87102 | 0.88373 | -0.17832 | 0.034115      | 0.33448 | 1.3993  | 0.48466  |
| TAG504-FA182              | 0.015685      | 0.1372   | 0.39388 | -1.3442  | 0.34575       | 0.99441 | 0.93256 | -0.10073 | 0.13338       | 0.80329 | 0.59097 | -0.75884 | 0.043491      | 0.33448 | 0.57014 | -0.81062 |
| DAG120/181                | 0.054149      | 0.19503  | 1.5273  | 0.61097  | 0.35653       | 0.99441 | 0.89297 | -0.16332 | 0.2302        | 0.80329 | 0.81154 | -0.30126 | 0.020153      | 0.32942 | 1.3829  | 0.46768  |
| TAG563-FA182              | 0.003743      | 0.13256  | 0.27979 | -1.8376  | 0.099327      | 0.99441 | 0.73795 | -0.4384  | 0.008797      | 0.80329 | 0.32925 | -1.6027  | 0.047962      | 0.33448 | 0.45441 | -1.1379  |
| DAG180/181                | 0.75527       | 0.86287  | 1.0743  | 0.10335  | 0.23153       | 0.99441 | 1.1442  | 0.19438  | 0.55486       | 0.89473 | 0.97074 | -0.04284 | 0.018758      | 0.31888 | 1.2748  | 0.35032  |
| ALLANTOIN_neg_2           | 0.43075       | 0.6401   | 1.5122  | 0.59666  | 0.16175       | 0.99441 | 1.445   | 0.53104  | 0.98728       | 0.99666 | 1.2138  | 0.27948  | 0.041824      | 0.33448 | 1.7998  | 0.84782  |
| TAG400-FA140              | 0.013391      | 0.1372   | 1.6112  | 0.68816  | 0.95          | 0.99441 | 0.98933 | -0.01547 | 0.48136       | 0.87857 | 1.0562  | 0.07889  | 0.046781      | 0.33448 | 1.3358  | 0.41775  |
| TAG525-FA181              | 0.022253      | 0.14379  | 0.4631  | -1.1106  | 0.35411       | 0.99441 | 0.87883 | -0.18634 | 0.23267       | 0.80329 | 0.69644 | -0.52192 | 0.03691       | 0.33448 | 0.5606  | -0.83496 |
| XANTHURENIC ACID_pos_2    | 0.022219      | 0.14379  | 0.67942 | -0.55762 | 0.019796      | 0.99441 | 0.85596 | -0.22439 | 0.85466       | 0.96928 | 1.3931  | 0.47825  | 0.001051      | 0.23372 | 0.46406 | -1.1076  |
| TAG541-FA200              | 4.22E-06      | 0.001795 | 0.32611 | -1.6165  | 0.86769       | 0.99441 | 0.96011 | -0.05873 | 0.24178       | 0.80329 | 0.70952 | -0.49508 | 0.002734      | 0.23372 | 0.5804  | -0.78487 |
| TAG483-FA160              | 0.017988      | 0.1372   | 0.52734 | -0.92319 | 0.33869       | 0.99441 | 0.8479  | -0.23803 | 0.44908       | 0.87149 | 0.76779 | -0.38121 | 0.007337      | 0.31888 | 0.61718 | -0.69623 |
| TAG481-FA160              | 0.20718       | 0.40577  | 0.84802 | -0.23783 | 0.49502       | 0.99441 | 0.9387  | -0.09126 | 0.99163       | 0.99678 | 1.0042  | 0.00608  | 0.025524      | 0.33448 | 0.8088  | -0.30614 |
| TAG462-FA120              | 0.27353       | 0.47839  | 0.87088 | -0.19945 | 0.3245        | 0.99441 | 0.89132 | -0.16599 | 0.97267       | 0.9957  | 1.0054  | 0.007736 | 0.045428      | 0.33448 | 0.79104 | -0.33818 |
| TAG512-FA160              | 0.31284       | 0.52661  | 1.2002  | 0.26329  | 0.89335       | 0.99441 | 1.0206  | 0.029462 | 0.42138       | 0.87102 | 0.92175 | -0.11755 | 0.039845      | 0.33448 | 1.2658  | 0.34     |
| 2-KETOHEXANOIC ACID_pos_2 | 0.28336       | 0.49153  | 1.832   | 0.87338  | 0.14435       | 0.99441 | 1.5869  | 0.6662   | 0.796         | 0.95886 | 1.012   | 0.017184 | 0.049372      | 0.33448 | 2.2674  | 1.181    |
| TAG561-FA160              | 0.01802       | 0.1372   | 0.33416 | -1.5814  | 0.66007       | 0.99441 | 0.91698 | -0.12504 | 0.90137       | 0.97744 | 0.68655 | -0.54257 | 0.002655      | 0.23372 | 0.42007 | -1.2513  |
| TAG543-FA181              | 0.014733      | 0.1372   | 0.4579  | -1.1269  | 0.25349       | 0.99441 | 0.88747 | -0.17223 | 0.22211       | 0.80329 | 0.69887 | -0.51691 | 0.014476      | 0.31888 | 0.56105 | -0.83379 |
| TAG522-FA160              | 0.023339      | 0.14379  | 0.43882 | -1.1883  | 0.45821       | 0.99441 | 0.91003 | -0.13601 | 0.25167       | 0.80329 | 0.67919 | -0.55811 | 0.044376      | 0.33448 | 0.54913 | -0.86479 |
| TAG483-FA140              | 0.031021      | 0.15925  | 0.4339  | -1.2046  | 0.67767       | 0.99441 | 1.044   | 0.062067 | 0.91144       | 0.97744 | 0.82932 | -0.26999 | 0.049997      | 0.33448 | 0.56899 | -0.81353 |
| TAG533-FA182              | 0.010579      | 0.1372   | 0.57543 | -0.79729 | 0.52865       | 0.99441 | 0.9344  | -0.09789 | 0.19785       | 0.80329 | 0.77456 | -0.36855 | 0.0375        | 0.33448 | 0.70753 | -0.49914 |
| TAG503-FA141              | 0.035591      | 0.15925  | 0.51578 | -0.95518 | 0.54658       | 0.99441 | 0.90201 | -0.14878 | 0.96855       | 0.99429 | 0.91688 | -0.1252  | 0.007806      | 0.31888 | 0.54706 | -0.87023 |
| TAG512-FA182              | 0.088387      | 0.2694   | 0.59514 | -0.74871 | 0.96072       | 0.99441 | 0.96918 | -0.04516 | 0.65536       | 0.90034 | 0.92807 | -0.10769 | 0.017978      | 0.31888 | 0.62341 | -0.68174 |
| TAG534-FA182              | 0.41247       | 0.62433  | 1.209   | 0.27383  | 0.94868       | 0.99441 | 1.0241  | 0.03432  | 0.3365        | 0.85641 | 0.89077 | -0.16687 | 0.045841      | 0.33448 | 1.3173  | 0.39756  |
| SM180                     | 0.025164      | 0.144    | 0.60628 | -0.72195 | 0.038441      | 0.99441 | 0.75398 | -0.4074  | 0.04019       | 0.80329 | 0.67896 | -0.5586  | 0.027882      | 0.33448 | 0.71155 | -0.49097 |
| TAG525-FA205              | 0.060172      | 0.20962  | 1.9126  | 0.93557  | 0.52293       | 0.99441 | 1.105   | 0.14409  | 0.80187       | 0.95886 | 0.95187 | -0.07116 | 0.00275       | 0.23372 | 1.963   | 0.97305  |
| TAG472-FA181              | 0.066479      | 0.22603  | 1.2993  | 0.37769  | 0.60085       | 0.99441 | 1.0599  | 0.08392  | 0.86987       | 0.97346 | 1.0112  | 0.01606  | 0.017963      | 0.31888 | 1.2844  | 0.3611   |
| TAG502-FA180              | 0.004223      | 0.13316  | 0.47835 | -1.0639  | 0.51563       | 0.99441 | 0.88638 | -0.17401 | 0.38627       | 0.87102 | 0.75602 | -0.40351 | 0.008719      | 0.31888 | 0.5595  | -0.83779 |
| TAG472-FA182              | 0.027018      | 0.14917  | 1.2735  | 0.34877  | 0.56608       | 0.99441 | 1.1004  | 0.13807  | 0.82674       | 0.96583 | 1.0889  | 0.12293  | 0.037406      | 0.33448 | 1.2192  | 0.2859   |
| TAG526-FA181              | 0.40169       | 0.62418  | 1.2517  | 0.3239   | 0.78436       | 0.99441 | 1.0535  | 0.075256 | 0.42519       | 0.87102 | 0.9208  | -0.11904 | 0.025708      | 0.33448 | 1.3532  | 0.43639  |
| TAG565-FA225              | 0.26744       | 0.47163  | 1.1533  | 0.20574  | 0.90328       | 0.99441 | 0.94338 | -0.08409 | 0.1926        | 0.80329 | 0.77113 | -0.37495 | 0.029594      | 0.33448 | 1.3498  | 0.43272  |
| L-ORNITHINE_pos_1         | 0.21627       | 0.41403  | 2.0904  | 1.0638   | 0.38386       | 0.99441 | 1.3454  | 0.42808  | 0.8457        | 0.96667 | 0.77885 | -0.36058 | 0.035454      | 0.33448 | 2.6276  | 1.3937   |

Supplementary Table S2E. List of dysregulated metabolites for female, male, Wild type and APChi mice following exposure to 9.5 Gy of Gamma-radiation, 6 months post-irradiation showing phenotype dependent response of radiation.

|                       | 9.5Gy / 0.0Gy |          |         |          | 9.5Gy / 0.0Gy |         |         |          | 9.5Gy / 0.0Gy |          |         |          | 9.5Gy / 0.0Gy |         |         |          |
|-----------------------|---------------|----------|---------|----------|---------------|---------|---------|----------|---------------|----------|---------|----------|---------------|---------|---------|----------|
|                       | Female        |          |         |          | Male          |         |         |          | WildType      |          |         |          | APChi         |         |         |          |
|                       | name          | p-value  | FDR     | FC       | LOG2FC        | p-value | FDR     | FC       | LOG2FC        | p-value  | FDR     | FC       | LOG2FC        | p-value | FDR     | FC       |
| AMINOADIPATE_pos_1    | 0.34267       | 0.58212  | 0.95122 | -0.07215 | 0.02556       | 0.54839 | 0.66344 | -0.59197 | 0.31058       | 0.5617   | 1.6698  | 0.73971  | 0.036019      | 0.56697 | 0.42531 | -1.2334  |
| TAG527-FA160          | 0.004944      | 0.071904 | 1.2361  | 0.3058   | 0.10315       | 0.55082 | 0.84433 | -0.24412 | 0.44956       | 0.66918  | 0.89842 | -0.15454 | 0.040443      | 0.57294 | 1.1284  | 0.17429  |
| TAG460-FA140          | 0.019348      | 0.10611  | 1.279   | 0.35497  | 0.87954       | 0.96019 | 1.0325  | 0.046153 | 0.42671       | 0.64769  | 1.0358  | 0.050781 | 0.048083      | 0.59265 | 1.2577  | 0.33030  |
| TAG513-FA150          | 0.005164      | 0.071904 | 0.13814 | -2.8558  | 0.54187       | 0.85329 | 0.85871 | -0.21967 | 0.069294      | 0.3309   | 0.19924 | -2.3275  | 0.022643      | 0.5398  | 0.29529 | -1.7598  |
| CHOLINE_pos_1         | 0.15023       | 0.34144  | 1.2631  | 0.337    | 0.28424       | 0.70059 | 1.6589  | 0.73023  | 0.93842       | 0.96751  | 1.1714  | 0.22819  | 0.033379      | 0.56697 | 1.6611  | 0.73217  |
| TAG440-FA160          | 0.013333      | 0.094441 | 1.3623  | 0.446    | 0.79438       | 0.95228 | 1.0306  | 0.043491 | 0.40339       | 0.6303   | 1.0395  | 0.055837 | 0.036016      | 0.56697 | 1.3177  | 0.39802  |
| TAG440-FA120          | 0.009268      | 0.07792  | 1.3873  | 0.47224  | 0.75107       | 0.93951 | 1.0845  | 0.11708  | 0.34305       | 0.57989  | 1.0637  | 0.089129 | 0.010686      | 0.5398  | 1.3863  | 0.47121  |
| TAG440-FA140          | 0.005377      | 0.071904 | 1.3488  | 0.43165  | 0.94604       | 0.97514 | 1.0667  | 0.093156 | 0.31583       | 0.56636  | 1.0588  | 0.082443 | 0.016246      | 0.5398  | 1.3407  | 0.42294  |
| TAG523-FA161          | 0.007104      | 0.07364  | 0.36093 | -1.4702  | 0.55235       | 0.85329 | 0.96589 | -0.05007 | 0.033121      | 0.26873  | 0.51489 | -0.95766 | 0.047097      | 0.59265 | 0.50492 | -0.98588 |
| TAG501-FA180          | 0.053682      | 0.18855  | 0.73033 | -0.45337 | 0.011116      | 0.39402 | 0.82748 | -0.2732  | 0.006611      | 0.1261   | 0.72176 | -0.47041 | 0.04919       | 0.59265 | 0.76798 | -0.38087 |
| TAG491-FA181          | 0.006479      | 0.072593 | 0.80691 | -0.30952 | 0.03644       | 0.54839 | 0.85745 | -0.22187 | 0.00222       | 0.096167 | 0.79923 | -0.32331 | 0.035101      | 0.56697 | 0.84761 | -0.23853 |
| TAG421-FA181          | 0.005541      | 0.071904 | 1.6527  | 0.72487  | 0.80888       | 0.95228 | 1.0966  | 0.13304  | 0.16494       | 0.43882  | 1.1289  | 0.1749   | 0.029347      | 0.54228 | 1.5122  | 0.59665  |
| TAG512-FA150          | 0.001228      | 0.047281 | 0.35394 | -1.4984  | 0.76487       | 0.95206 | 0.90386 | -0.14582 | 0.10419       | 0.37691  | 0.43177 | -1.2117  | 0.010935      | 0.5398  | 0.56235 | -0.83047 |
| TAG511-FA181          | 0.003008      | 0.060885 | 0.66244 | -0.59414 | 0.075178      | 0.54839 | 0.88644 | -0.17391 | 0.001882      | 0.096167 | 0.67619 | -0.56449 | 0.039973      | 0.57294 | 0.80733 | -0.30877 |
| TAG492-FA160          | 0.000423      | 0.029944 | 0.65523 | -0.60992 | 0.12264       | 0.57117 | 0.9128  | -0.13162 | 0.010606      | 0.15025  | 0.76294 | -0.39037 | 0.002934      | 0.5398  | 0.7642  | -0.38798 |
| TAG400-FA160          | 0.002883      | 0.060885 | 1.5297  | 0.61328  | 0.78908       | 0.95228 | 1.1269  | 0.17236  | 0.2779        | 0.5393   | 1.0887  | 0.12262  | 0.012         | 0.5398  | 1.5126  | 0.59699  |
| TAG420-FA140          | 0.006873      | 0.073023 | 1.3512  | 0.43429  | 0.80296       | 0.95228 | 1.0744  | 0.10351  | 0.25649       | 0.5191   | 1.0767  | 0.10666  | 0.018949      | 0.5398  | 1.3408  | 0.42315  |
| N-ACETYLALANINE_neg_1 | 0.001572      | 0.047281 | 0.40158 | -1.3162  | 0.19231       | 0.62869 | 0.7937  | -0.33333 | 0.085356      | 0.3448   | 0.73504 | -0.4441  | 0.017134      | 0.5398  | 0.51894 | -0.94637 |
| TAG400-FA140          | 0.00228       | 0.052941 | 1.4558  | 0.54183  | 0.28847       | 0.70059 | 1.1593  | 0.21329  | 0.14308       | 0.41651  | 1.1504  | 0.20216  | 0.002668      | 0.5398  | 1.4613  | 0.54729  |
| TAG400-FA120          | 0.008994      | 0.07792  | 1.4171  | 0.50298  | 0.2319        | 0.67154 | 1.1688  | 0.22498  | 0.12844       | 0.39984  | 1.1546  | 0.20734  | 0.008467      | 0.5398  | 1.4414  | 0.52743  |
| TAG492-FA182          | 0.019878      | 0.10611  | 0.58132 | -0.78261 | 0.18924       | 0.62869 | 0.8946  | -0.16069 | 0.12313       | 0.39984  | 0.69617 | -0.52249 | 0.020146      | 0.5398  | 0.74807 | -0.41875 |
| TAG503-FA161          | 0.004343      | 0.071904 | 0.52141 | -0.93952 | 0.40944       | 0.80947 | 0.93463 | -0.09753 | 0.045277      | 0.29047  | 0.72834 | -0.45733 | 0.025691      | 0.54228 | 0.62725 | -0.67288 |
| TAG421-FA120          | 0.024865      | 0.12274  | 1.3127  | 0.39248  | 0.3303        | 0.75069 | 1.1706  | 0.22726  | 0.17381       | 0.4469   | 1.1213  | 0.16522  | 0.023553      | 0.5398  | 1.4213  | 0.50722  |
| TAG420-FA120          | 0.005524      | 0.071904 | 1.3689  | 0.45299  | 0.23579       | 0.67154 | 1.1836  | 0.24319  | 0.14256       | 0.41651  | 1.141   | 0.1903   | 0.004973      | 0.5398  | 1.4351  | 0.52112  |
| TAG492-FA150          | 0.001013      | 0.04305  | 0.57997 | -0.78595 | 0.14739       | 0.59096 | 0.88981 | -0.16843 | 0.002365      | 0.096167 | 0.66411 | -0.5905  | 0.029262      | 0.54228 | 0.74473 | -0.4252  |
| CER160                | 1.23E-05      | 0.004552 | 0.10801 | -3.2107  | 0.28965       | 0.70059 | 1.2682  | 0.34276  | 0.074951      | 0.33329  | 0.27215 | -1.8775  | 0.009063      | 0.5398  | 0.33228 | -1.5895  |
| TAG503-FA182          | 0.00577       | 0.071904 | 0.41085 | -1.2833  | 0.10117       | 0.55082 | 0.88469 | -0.17676 | 0.004666      | 0.098784 | 0.5313  | -0.91241 | 0.044907      | 0.59265 | 0.57111 | -0.80816 |
| TAG493-FA182          | 0.021591      | 0.11106  | 0.77148 | -0.37429 | 0.6906        | 0.90885 | 0.94592 | -0.08021 | 0.9402        | 0.96751  | 0.93549 | -0.09621 | 0.024132      | 0.5398  | 0.79533 | -0.33037 |
| TAG512-FA170          | 0.001669      | 0.047281 | 0.5679  | -0.8163  | 0.38945       | 0.79813 | 0.93398 | -0.09854 | 0.03102       | 0.26735  | 0.6853  | -0.54518 | 0.02767       | 0.54228 | 0.74472 | -0.42522 |
| CER220                | 9.1E-05       | 0.009668 | 0.10827 | -3.2073  | 0.8077        | 0.95228 | 0.89453 | -0.1608  | 0.003484      | 0.096167 | 0.12673 | -2.9801  | 0.022114      | 0.5398  | 0.21186 | -2.2388  |
| TAG525-FA205          | 0.009611      | 0.07792  | 1.4543  | 0.54028  | 0.10887       | 0.55082 | 1.4957  | 0.58078  | 0.049199      | 0.29221  | 1.289   | 0.36628  | 0.017638      | 0.5398  | 1.7611  | 0.81652  |
| TAG513-FA182          | 0.001614      | 0.047281 | 0.3535  | -1.5002  | 0.093341      | 0.54839 | 0.8645  | -0.21006 | 0.004731      | 0.098784 | 0.42901 | -1.2209  | 0.012482      | 0.5398  | 0.54851 | -0.8664  |
| TAG492-FA140          | 0.55177       | 0.73743  | 1.0665  | 0.092842 | 0.00816       | 0.34678 | 1.347   | 0.42971  | 0.17973       | 0.4574   | 1.1429  | 0.19267  | 0.037586      | 0.57051 | 1.3506  | 0.43364  |
| TAG503-FA181          | 0.021689      | 0.11106  | 0.71589 | -0.48219 | 0.12335       | 0.57117 | 0.91509 | -0.12801 | 0.053557      | 0.29221  | 0.83752 | -0.25581 | 0.023486      | 0.5398  | 0.7574  | -0.40088 |



Supplementary Table S3A. List of dysregulated metabolites for female mice following exposure to 9.5 Gy of Gamma-radiation, 24 h, 1 week, 1 month, 3 month and 6 months post-irradiation.

| name                           | 9.5Gy / 0.0Gy |          |         |        | 9.5Gy / 0.0Gy |          |         |         | 9.5Gy / 0.0Gy |        |          |          | 9.5Gy / 0.0Gy |     |        |          | 9.5Gy / 0.0Gy |         |    |        |          |          |         |   |        |
|--------------------------------|---------------|----------|---------|--------|---------------|----------|---------|---------|---------------|--------|----------|----------|---------------|-----|--------|----------|---------------|---------|----|--------|----------|----------|---------|---|--------|
|                                | 24h           |          |         |        | 1wk           |          |         |         | 1mo           |        |          |          | 3mo           |     |        |          | 6mo           |         |    |        |          |          |         |   |        |
|                                | p-value       | FDR      | FC      | LOG2FC | p-value       | FDR      | FC      | LOG2FC  | p-value       | FDR    | FC       | LOG2FC   | p-value       | FDR | FC     | LOG2FC   | p-value       | FDR     | FC | LOG2FC |          |          |         |   |        |
| XANTHOSINE_neg_1               | 3.2E-08       | 1.36E-05 | 4.6848  | ↑      | 2.228         | 0.88496  | 0.98297 | 0.93958 | ↓             | -0.09  | 0.68509  | 0.99953  | 1.0607        | ↑   | 0.085  | 0.14544  | 0.3415        | 0.66773 | ↓  | -0.583 | 0.68019  | 0.85048  | 1.1155  | ↑ | 0.1577 |
| CYSTEINE_neg_5                 | 6.97E-07      | 0.000148 | 3.3658  | ↑      | 1.7509        | 0.67261  | 0.97562 | 1.0865  | ↑             | 0.1198 | 0.39023  | 0.99953  | 0.8642        | ↓   | -0.211 | 0.14091  | 0.33558       | 1.3473  | ↑  | 0.4301 | 0.95458  | 0.98388  | 0.96587 | ↓ | -0.05  |
| PYROPHOSPHATE_neg_3            | 2.68E-05      | 0.003799 | 3.4684  | ↑      | 1.7943        | 0.61496  | 0.97562 | 1.3679  | ↑             | 0.452  | 0.14722  | 0.91055  | 1.5253        | ↑   | 0.6091 | 0.18751  | 0.38685       | 0.80233 | ↓  | -0.318 | 0.43869  | 0.6588   | 1.0687  | ↑ | 0.0959 |
| N-ACETYLGUTAMINE_pos_2         | 8.84E-05      | 0.009395 | 6.7286  | ↑      | 2.7503        | 0.79526  | 0.98297 | 0.78748 | ↓             | -0.345 | 0.064659 | 0.87596  | 2.4339        | ↑   | 1.2833 | 0.11043  | 0.2916        | 1.7889  | ↑  | 0.8391 | 0.072779 | 0.22304  | 1.8374  | ↑ | 0.8777 |
| INDOLE-3-CARBOXYLIC_ACID_neg_1 | 0.000493      | 0.041908 | 1.8298  | ↑      | 0.8717        | 0.23707  | 0.95194 | 1.2021  | ↑             | 0.2656 | 0.11093  | 0.89093  | 1.2226        | ↑   | 0.29   | 0.2221   | 0.41821       | 1.2237  | ↑  | 0.2912 | 0.91486  | 0.9732   | 0.88097 | ↓ | -0.183 |
| CE204                          | 0.002393      | 0.16951  | 5.9315  | ↑      | 2.5684        | 0.16098  | 0.95194 | 2.2096  | ↑             | 1.1438 | 0.11694  | 0.89093  | 3.2394        | ↑   | 1.6957 | 0.58502  | 0.73583       | 0.81133 | ↓  | -0.302 | 0.043476 | 0.16498  | 0.73603 | ↓ | -0.442 |
| N-ACETYLORNITHINE_neg_3        | 0.003118      | 0.18928  | 2.1245  | ↑      | 1.0871        | 0.96042  | 0.98357 | 1.0483  | ↑             | 0.068  | 0.000196 | 0.083154 | 0.37793       | ↓   | -1.404 | 0.056825 | 0.20295       | 1.7991  | ↑  | 0.8473 | 0.74547  | 0.88952  | 1.4685  | ↑ | 0.5543 |
| OXOGLUTARATE_neg_2             | 0.004755      | 0.25259  | 0.20202 | ↓      | -2.307        | 0.034941 | 0.95194 | 0.28826 | ↓             | -1.795 | 0.49713  | 0.99953  | 1.2927        | ↑   | 0.3704 | 0.50156  | 0.68985       | 0.94293 | ↓  | -0.085 | 0.087383 | 0.24116  | 0.71599 | ↓ | -0.482 |
| CE182                          | 0.005901      | 0.27867  | 2.2682  | ↑      | 1.1816        | 0.62544  | 0.97562 | 1.199   | ↑             | 0.2618 | 0.1903   | 0.93892  | 1.795         | ↑   | 0.844  | 0.56063  | 0.73066       | 1.1159  | ↑  | 0.1583 | 0.052314 | 0.18683  | 0.7843  | ↓ | -0.351 |
| NORMETANEPHRINE_pos_1          | 0.006909      | 0.29364  | 2.0563  | ↑      | 1.0401        | 0.19929  | 0.95194 | 2.3139  | ↑             | 1.2103 | 0.42754  | 0.99953  | 0.41801       | ↓   | -1.258 | 0.78533  | 0.87833       | 1.1398  | ↑  | 0.1887 | 0.025126 | 0.12274  | 1.6771  | ↑ | 0.746  |
| ASCORBATE_neg_2                | 0.007663      | 0.29606  | 3.1427  | ↑      | 1.652         | 0.93711  | 0.98297 | 1.3343  | ↑             | 0.4161 | 0.10102  | 0.89093  | 0.80214       | ↓   | -0.318 | 0.54456  | 0.72099       | 0.71944 | ↓  | -0.475 | 0.91825  | 0.9732   | 0.92817 | ↓ | -0.108 |
| ACETYL-COA_pos_1               | 0.012974      | 0.45949  | 2.4651  | ↑      | 1.3016        | 0.094709 | 0.95194 | 1.5474  | ↑             | 0.6298 | 0.64969  | 0.99953  | 2.5213        | ↑   | 1.3342 | 0.46698  | 0.66904       | 1.5207  | ↑  | 0.6048 | 0.74719  | 0.88952  | 0.98153 | ↓ | -0.027 |
| N-GLYCYL-L-PROLINE_neg_3       | 0.017907      | 0.58541  | 2.7965  | ↑      | 1.4836        | 0.87897  | 0.98297 | 0.63118 | ↓             | -0.664 | 0.22238  | 0.95973  | 1.5106        | ↑   | 0.5951 | 0.17601  | 0.38685       | 1.4758  | ↑  | 0.5615 | 0.42407  | 0.6483   | 0.56107 | ↓ | -0.834 |
| AMINOADIPATE_pos_1             | 0.020786      | 0.63101  | 2.2144  | ↑      | 1.1469        | 0.083223 | 0.95194 | 0.34915 | ↓             | -1.518 | 0.58947  | 0.99953  | 1.3954        | ↑   | 0.4807 | 0.80078  | 0.88628       | 3.4808  | ↑  | 1.7994 | 0.34267  | 0.58212  | 0.95122 | ↓ | -0.072 |
| L-CARNITINE_pos_1              | 0.022692      | 0.64294  | 4.0538  | ↑      | 2.0193        | 0.93182  | 0.98297 | 0.74546 | ↓             | -0.424 | 0.73067  | 0.99953  | 0.96537       | ↓   | -0.051 | 0.99868  | 0.99868       | 1.7876  | ↑  | 0.838  | 0.89231  | 0.96531  | 1.3288  | ↑ | 0.4102 |
| CE226                          | 0.027135      | 0.697    | 2.729   | ↑      | 1.4484        | 0.67435  | 0.97562 | 1.1055  | ↑             | 0.1448 | 0.37269  | 0.99953  | 1.6446        | ↑   | 0.7178 | 0.006099 | 0.1372        | 2.7635  | ↑  | 1.4665 | 0.059905 | 0.19456  | 1.6599  | ↑ | 0.7311 |
| TAG566-FA225                   | 0.02788       | 0.697    | 1.5091  | ↑      | 0.5937        | 0.97292  | 0.98479 | 1.0034  | ↑             | 0.0048 | 0.43322  | 0.99953  | 0.71244       | ↓   | -0.489 | 0.15081  | 0.35025       | 0.79429 | ↓  | -0.332 | 0.52093  | 0.71418  | 0.83292 | ↓ | -0.264 |
| GERANYL-PP-HPO3_neg_2          | 0.035002      | 0.79883  | 1.7401  | ↑      | 0.7991        | 0.48233  | 0.97562 | 0.73966 | ↓             | -0.435 | 0.11669  | 0.89093  | 2.0914        | ↑   | 1.0645 | 0.94662  | 0.98125       | 1.3726  | ↑  | 0.4569 | 0.48426  | 0.68679  | 0.88212 | ↓ | -0.181 |
| TAG544-FA224                   | 0.035713      | 0.79883  | 1.3368  | ↑      | 0.4187        | 0.51234  | 0.97562 | 1.4422  | ↑             | 0.5283 | 0.013325 | 0.62598  | 0.38637       | ↓   | -1.372 | 0.46877  | 0.66904       | 1.3295  | ↑  | 0.4109 | 0.86436  | 0.95915  | 1.1016  | ↑ | 0.1396 |
| ACETYLPHOSPHATE_pos_1          | 0.041064      | 0.87261  | 0.55006 | ↓      | -0.862        | 0.26551  | 0.95194 | 0.80639 | ↓             | -0.31  | 0.59464  | 0.99953  | 1.1401        | ↑   | 0.1892 | 0.59481  | 0.74351       | 1.1232  | ↑  | 0.1676 | 0.23042  | 0.45128  | 0.83663 | ↓ | -0.257 |
| N-ACETYLPUTRESCINE_pos_1       | 0.049127      | 0.95219  | 0.10127 | ↓      | -3.304        | 0.65039  | 0.97562 | 0.93202 | ↓             | -0.102 | 0.59714  | 0.99953  | 0.95079       | ↓   | -0.073 | 0.10744  | 0.29083       | 1.4687  | ↑  | 0.5545 | 0.98156  | 0.99089  | 1.1382  | ↑ | 0.1868 |
| TAG522-FA202                   | 0.050845      | 0.95219  | 1.3133  | ↑      | 0.3932        | 0.6287   | 0.97562 | 1.5137  | ↑             | 0.5981 | 0.008694 | 0.61582  | 0.3735        | ↓   | -1.421 | 0.21117  | 0.40795       | 1.6024  | ↑  | 0.6802 | 0.50108  | 0.70516  | 1.0996  | ↑ | 0.1369 |
| TAG565-FA181                   | 0.057481      | 0.95219  | 2.7694  | ↑      | 1.4696        | 0.58603  | 0.97562 | 0.47221 | ↓             | -1.083 | 0.47983  | 0.99953  | 0.8001        | ↓   | -0.322 | 0.00351  | 0.13256       | 0.15593 | ↓  | -2.681 | 0.003245 | 0.062679 | 0.14568 | ↓ | -2.779 |
| TAG582-FA181                   | 0.082354      | 0.96989  | 1.7279  | ↑      | 0.789         | 0.29267  | 0.95194 | 0.49568 | ↓             | -1.013 | 0.97481  | 0.99953  | 0.94037       | ↓   | -0.089 | 0.006539 | 0.1372        | 0.19481 | ↓  | -2.36  | 0.009489 | 0.07792  | 0.29764 | ↓ | -1.748 |
| TAG527-FA160                   | 0.082836      | 0.96989  | 0.8191  | ↓      | -0.288        | 0.29285  | 0.95194 | 1.2397  | ↑             | 0.31   | 0.31004  | 0.99215  | 0.76025       | ↓   | -0.395 | 0.29759  | 0.51205       | 1.0911  | ↑  | 0.1258 | 0.004944 | 0.071904 | 1.2361  | ↑ | 0.3058 |
| TAG545-FA205                   | 0.092485      | 0.96989  | 0.50992 | ↓      | -0.972        | 0.019211 | 0.95194 | 1.9741  | ↑             | 0.9812 | 0.14665  | 0.91055  | 0.53627       | ↓   | -0.899 | 0.40516  | 0.62418       | 0.90818 | ↓  | -0.139 | 0.462    | 0.67408  | 1.2898  | ↑ | 0.3672 |
| TAG521-FA201                   | 0.095023      | 0.96989  | 1.4201  | ↑      | 0.506         | 0.94371  | 0.98297 | 1.0156  | ↑             | 0.0223 | 0.002293 | 0.46622  | 0.54014       | ↓   | -0.889 | 0.18658  | 0.38685       | 0.83588 | ↓  | -0.259 | 0.46313  | 0.67408  | 0.77546 | ↓ | -0.367 |
| TAG521-FA161                   | 0.12162       | 0.96989  | 1.112   | ↑      | 0.1531        | 0.54025  | 0.97562 | 1.0011  | ↑             | 0.0016 | 0.008581 | 0.61582  | 0.58627       | ↓   | -0.77  | 0.9125   | 0.96231       | 1.099   | ↑  | 0.1362 | 0.10837  | 0.27253  | 0.83986 | ↓ | -0.252 |
| TAG462-FA182                   | 0.13404       | 0.96989  | 0.86917 | ↓      | -0.202        | 0.61429  | 0.97562 | 1.0685  | ↑             | 0.0955 | 0.68986  | 0.99953  | 0.97463       | ↓   | -0.037 | 0.81042  | 0.88877       | 1.0924  | ↑  | 0.1275 | 0.038752 | 0.1543   | 1.2727  | ↑ | 0.3479 |
| SM160                          | 0.14303       | 0.96989  | 0.74695 | ↓      | -0.421        | 0.023922 | 0.95194 | 1.9239  | ↑             | 0.9441 | 0.0544   |          |               |     |        |          |               |         |    |        |          |          |         |   |        |



|                        |         |         |         |   |        |          |         |         |   |        |          |         |         |   |        |          |          |         |   |        |          |          |         |   |        |
|------------------------|---------|---------|---------|---|--------|----------|---------|---------|---|--------|----------|---------|---------|---|--------|----------|----------|---------|---|--------|----------|----------|---------|---|--------|
| TAG471-FA181           | 0.50938 | 0.96989 | 0.96619 | ↓ | -0.05  | 0.9584   | 0.98357 | 0.99918 | ↓ | -0.001 | 0.66335  | 0.99953 | 0.89279 | ↓ | -0.164 | 0.012501 | 0.1372   | 1.3518  | ↑ | 0.4348 | 0.068828 | 0.21352  | 1.1636  | ↑ | 0.2186 |
| TAG492-FA160           | 0.51786 | 0.96989 | 1.1182  | ↑ | 0.1612 | 0.23918  | 0.95194 | 0.7833  | ↓ | -0.352 | 0.81274  | 0.99953 | 1.1369  | ↑ | 0.1852 | 0.11115  | 0.2916   | 0.78205 | ↓ | -0.355 | 0.000423 | 0.029944 | 0.65523 | ↓ | -0.61  |
| TAG542-FA201           | 0.51887 | 0.96989 | 1.3795  | ↑ | 0.4641 | 0.38976  | 0.95901 | 0.66957 | ↓ | -0.579 | 0.65012  | 0.99953 | 0.78992 | ↓ | -0.34  | 0.003564 | 0.13256  | 0.32654 | ↓ | -1.615 | 0.006377 | 0.072593 | 0.44045 | ↓ | -1.183 |
| TAG400-FA160           | 0.51918 | 0.96989 | 0.95212 | ↓ | -0.071 | 0.27562  | 0.95194 | 1.2376  | ↑ | 0.3076 | 0.79999  | 0.99953 | 1.0008  | ↑ | 0.0011 | 0.069627 | 0.233    | 1.4428  | ↑ | 0.5289 | 0.002883 | 0.060885 | 1.5297  | ↑ | 0.6133 |
| TAG521-FA180           | 0.52404 | 0.96989 | 1.5417  | ↑ | 0.6246 | 0.66959  | 0.97562 | 0.68043 | ↓ | -0.555 | 0.56582  | 0.99953 | 1.1222  | ↑ | 0.1663 | 0.040762 | 0.17152  | 0.50322 | ↓ | -0.991 | 0.030758 | 0.13906  | 0.43404 | ↓ | -1.204 |
| TAG502-FA161           | 0.5269  | 0.96989 | 1.1458  | ↑ | 0.1963 | 0.050638 | 0.95194 | 0.61633 | ↓ | -0.698 | 0.72855  | 0.99953 | 1.0331  | ↑ | 0.047  | 0.035902 | 0.15925  | 0.50041 | ↓ | -0.999 | 0.007733 | 0.076901 | 0.59452 | ↓ | -0.75  |
| TAG504-FA182           | 0.5307  | 0.96989 | 0.85675 | ↓ | -0.223 | 0.19567  | 0.95194 | 0.64471 | ↓ | -0.633 | 0.34783  | 0.99953 | 1.1886  | ↑ | 0.2492 | 0.015685 | 0.1372   | 0.39388 | ↓ | -1.344 | 0.005922 | 0.071904 | 0.54847 | ↓ | -0.867 |
| TAG491-FA160           | 0.53326 | 0.96989 | 1.0936  | ↑ | 0.1291 | 0.089664 | 0.95194 | 0.68383 | ↓ | -0.548 | 0.4145   | 0.99953 | 1.1255  | ↑ | 0.1706 | 0.52043  | 0.69561  | 0.93456 | ↓ | -0.098 | 0.0049   | 0.071904 | 0.76891 | ↓ | -0.379 |
| TAG555-FA182           | 0.53377 | 0.96989 | 0.68295 | ↓ | -0.55  | 0.62435  | 0.97562 | 1.0047  | ↑ | 0.0068 | 0.13892  | 0.91055 | 0.84245 | ↓ | -0.247 | 0.56529  | 0.73247  | 1.1528  | ↑ | 0.2051 | 0.035367 | 0.15338  | 1.206   | ↑ | 0.2703 |
| TAG500-FA140           | 0.53386 | 0.96989 | 0.93665 | ↓ | -0.094 | 0.14746  | 0.95194 | 1.2723  | ↑ | 0.3474 | 0.254    | 0.99215 | 0.7513  | ↓ | -0.413 | 0.077816 | 0.25016  | 1.2583  | ↑ | 0.3314 | 0.012979 | 0.093493 | 1.3358  | ↑ | 0.4177 |
| TAG524-FA180           | 0.54034 | 0.96989 | 1.0437  | ↑ | 0.0618 | 0.92735  | 0.98297 | 1.1221  | ↑ | 0.1662 | 0.7363   | 0.99953 | 0.77798 | ↓ | -0.362 | 0.033053 | 0.15925  | 0.61392 | ↓ | -0.704 | 0.057031 | 0.19224  | 0.60009 | ↓ | -0.737 |
| TAG547-FA182           | 0.54143 | 0.96989 | 0.30021 | ↓ | -1.736 | 0.81094  | 0.98297 | 0.71377 | ↓ | -0.486 | 0.46028  | 0.99953 | 0.79751 | ↓ | -0.326 | 0.91183  | 0.96231  | 1.1476  | ↑ | 0.1986 | 4.18E-05 | 0.005925 | 2.1612  | ↑ | 1.1119 |
| TAG420-FA140           | 0.54214 | 0.96989 | 0.95952 | ↓ | -0.06  | 0.38693  | 0.95901 | 1.1319  | ↑ | 0.1787 | 0.80389  | 0.99953 | 0.92551 | ↓ | -0.112 | 0.016749 | 0.1372   | 1.4631  | ↑ | 0.549  | 0.006873 | 0.073023 | 1.3512  | ↑ | 0.4343 |
| TAG563-FA182           | 0.54627 | 0.96989 | 0.87346 | ↓ | -0.195 | 0.82177  | 0.98297 | 0.69165 | ↓ | -0.532 | 0.79355  | 0.99953 | 1.0327  | ↑ | 0.0464 | 0.003743 | 0.13256  | 0.27979 | ↓ | -1.838 | 0.13222  | 0.30876  | 0.47355 | ↓ | -1.078 |
| TAG587-FA182           | 0.55039 | 0.96989 | 1.3847  | ↑ | 0.4696 | 0.68875  | 0.97602 | 1.0409  | ↑ | 0.0578 | 0.98999  | 0.99953 | 0.8169  | ↓ | -0.292 | 0.016371 | 0.1372   | 0.55827 | ↓ | -0.841 | 0.014901 | 0.10041  | 0.52181 | ↓ | -0.938 |
| TAG546-FA182           | 0.5512  | 0.96989 | 0.31645 | ↓ | -1.66  | 0.91491  | 0.98297 | 0.67261 | ↓ | -0.572 | 0.96382  | 0.99953 | 0.92795 | ↓ | -0.108 | 0.74     | 0.85014  | 0.98807 | ↓ | -0.017 | 0.002152 | 0.052941 | 1.8118  | ↑ | 0.8574 |
| TAG563-FA201           | 0.55569 | 0.96989 | 1.2716  | ↑ | 0.3466 | 0.13529  | 0.95194 | 0.57325 | ↓ | -0.803 | 0.44514  | 0.99953 | 0.74145 | ↓ | -0.432 | 0.003148 | 0.13256  | 0.31698 | ↓ | -1.658 | 0.026482 | 0.12789  | 0.49626 | ↓ | -1.011 |
| N-ACETYLALANINE_neg_1  | 0.56368 | 0.96989 | 1.4634  | ↑ | 0.5494 | 0.88553  | 0.98297 | 0.78377 | ↓ | -0.352 | 0.90954  | 0.99953 | 0.90229 | ↓ | -0.148 | 0.033175 | 0.15925  | 0.39094 | ↓ | -1.355 | 0.001572 | 0.047281 | 0.40158 | ↓ | -1.316 |
| DAG180/181             | 0.56914 | 0.97245 | 0.89447 | ↓ | -0.161 | 0.50863  | 0.97562 | 1.1826  | ↑ | 0.2419 | 0.048485 | 0.87596 | 0.72046 | ↓ | -0.473 | 0.75527  | 0.86287  | 1.0743  | ↑ | 0.1034 | 0.31171  | 0.55199  | 1.1177  | ↑ | 0.1606 |
| TAG400-FA140           | 0.58719 | 0.97467 | 0.99221 | ↓ | -0.011 | 0.48188  | 0.97562 | 1.069   | ↑ | 0.0963 | 0.59767  | 0.99953 | 0.90521 | ↓ | -0.144 | 0.013391 | 0.1372   | 1.6112  | ↑ | 0.6882 | 0.00228  | 0.052941 | 1.4558  | ↑ | 0.5418 |
| TAG543-FA183           | 0.59232 | 0.97467 | 1.0581  | ↑ | 0.0815 | 0.32787  | 0.95194 | 1.5662  | ↑ | 0.6473 | 0.011421 | 0.62598 | 0.33658 | ↓ | -1.571 | 0.64415  | 0.78443  | 1.1776  | ↑ | 0.2358 | 0.85639  | 0.95529  | 1.0135  | ↑ | 0.0194 |
| TAG470-FA150           | 0.60163 | 0.97467 | 0.91677 | ↓ | -0.125 | 0.65557  | 0.97562 | 1.0752  | ↑ | 0.1046 | 0.59141  | 0.99953 | 0.89525 | ↓ | -0.16  | 0.025033 | 0.144    | 1.2961  | ↑ | 0.3742 | 0.11854  | 0.28954  | 1.1396  | ↑ | 0.1886 |
| TAG522-FA181           | 0.6026  | 0.97467 | 1.3289  | ↑ | 0.4102 | 0.5125   | 0.97562 | 0.64415 | ↓ | -0.635 | 0.62345  | 0.99953 | 1.008   | ↑ | 0.0115 | 0.022253 | 0.14379  | 0.4631  | ↓ | -1.111 | 0.05997  | 0.19456  | 0.49715 | ↓ | -1.008 |
| TAG503-FA140           | 0.60552 | 0.97467 | 1.1413  | ↑ | 0.1907 | 0.20327  | 0.95194 | 0.67956 | ↓ | -0.557 | 0.54241  | 0.99953 | 0.97715 | ↓ | -0.033 | 0.021823 | 0.14379  | 0.37773 | ↓ | -1.405 | 0.074037 | 0.22304  | 0.49052 | ↓ | -1.028 |
| TAG541-FA180           | 0.60894 | 0.97467 | 1.4856  | ↑ | 0.5711 | 0.4643   | 0.97562 | 0.59053 | ↓ | -0.76  | 0.51147  | 0.99953 | 1.1391  | ↑ | 0.1879 | 0.044114 | 0.17687  | 0.49142 | ↓ | -1.025 | 0.018407 | 0.10611  | 0.39938 | ↓ | -1.324 |
| TAG484-FA182           | 0.61147 | 0.97467 | 1.0594  | ↑ | 0.0833 | 0.039359 | 0.95194 | 0.6076  | ↓ | -0.719 | 0.10018  | 0.89093 | 1.604   | ↑ | 0.6817 | 0.33152  | 0.55037  | 0.72576 | ↓ | -0.462 | 0.34311  | 0.58212  | 0.76494 | ↓ | -0.387 |
| XANTHURENIC ACID_pos_2 | 0.61224 | 0.97467 | 0.45804 | ↓ | -1.126 | 0.15816  | 0.95194 | 0.75781 | ↓ | -0.4   | 0.88732  | 0.99953 | 1.2151  | ↑ | 0.2811 | 0.022219 | 0.14379  | 0.67942 | ↓ | -0.558 | 0.78427  | 0.91353  | 0.72545 | ↓ | -0.463 |
| TAG541-FA200           | 0.61728 | 0.97467 | 1.3357  | ↑ | 0.4176 | 0.25317  | 0.95194 | 0.60463 | ↓ | -0.726 | 0.66306  | 0.99953 | 0.99761 | ↓ | -0.003 | 4.22E-06 | 0.001795 | 0.32611 | ↓ | -1.617 | 0.78456  | 0.91353  | 0.85739 | ↓ | -0.222 |
| TAG589-FA181           | 0.61897 | 0.97467 | 1.2145  | ↑ | 0.2804 | 0.63094  | 0.97562 | 1.1538  | ↑ | 0.2064 | 0.6005   | 0.99953 | 0.76414 | ↓ | -0.388 | 0.093239 | 0.27151  | 0.64443 | ↓ | -0.634 | 2.14E-05 | 0.004552 | 0.40271 | ↓ | -1.312 |
| TAG400-FA120           | 0.6192  | 0.97467 | 0.98153 | ↓ | -0.027 | 0.67681  | 0.97562 | 1.0061  | ↑ | 0.0087 | 0.38709  | 0.99953 | 0.79459 | ↓ | -0.332 | 0.010021 | 0.1372   | 1.7265  | ↑ | 0.7879 | 0.008994 | 0.07792  | 1.4171  | ↑ | 0.503  |
| TAG480-FA180           | 0.62637 | 0.97467 | 0.95227 | ↓ | -0.071 | 0.21903  | 0.95194 | 1.2192  | ↑ | 0.286  | 0.99636  | 0.99953 | 0.99177 | ↓ | -0.012 | 0.18534  | 0.38685  | 1.1712  | ↑ | 0.228  | 0.028681 | 0.13417  | 1.3523  | ↑ | 0.4354 |
| TAG531-FA180           | 0.63277 | 0.97467 | 1.1177  | ↑ | 0.1606 | 0.35105  | 0.95726 | 1.2199  | ↑ | 0.2867 | 0.1503   | 0.91055 | 0.74491 | ↓ | -0.425 | 0.95782  | 0.98357  | 1.0196  | ↑ | 0.028  | 0.007962 | 0.076901 | 0.74348 | ↓ | -0.428 |
| TAG492-FA182           | 0.64727 | 0.97467 | 1.1157  | ↑ | 0.158  | 0.18983  | 0.95194 | 0.749   | ↓ | -0.417 | 0.19921  | 0.93892 | 1.4634  | ↑ | 0.5493 | 0.17988  | 0.38685  | 0.75617 | ↓ | -0.403 | 0.019878 | 0.10611  | 0.58132 | ↓ | -0.783 |
| TAG542-FA180           | 0.64872 | 0.97467 | 1.3577  | ↑ | 0.4411 | 0.77422  | 0.98297 | 0.63613 | ↓ | -0.653 | 0.7918   | 0.99953 | 1.024   | ↑ | 0.0342 | 0.02436  | 0.14379  | 0.40571 | ↓ | -1.302 | 0.052151 | 0.18683  | 0.41212 | ↓ | -1.279 |
| TAG483-FA160           | 0.65498 | 0.97467 | 0.8093  | ↓ | -0.305 | 0.44363  | 0.97562 | 0.77316 | ↓ | -0.371 | 0.10131  | 0.89093 | 1.3406  | ↑ | 0.4229 | 0.017988 | 0.1372   | 0.52734 | ↓ | -0.923 | 0.19936  | 0.41131  | 0.74686 | ↓ | -0.421 |
| TAG542-FA181           | 0.65602 | 0.97467 | 1.3502  | ↑ | 0.4332 | 0.44858  | 0.97562 | 0.57674 | ↓ | -0.794 | 0.64401  | 0.99953 | 0.96915 | ↓ | -0.045 | 0.023233 | 0.14379  | 0.42758 | ↓ | -1.226 | 0.083328 | 0.23821  | 0.50276 | ↓ | -0.992 |
| SM241                  | 0.65677 | 0.97467 | 0.9262  | ↓ | -0.111 | 0.19654  | 0.95194 | 1.5876  | ↑ | 0.6668 | 0.60648  | 0.99953 | 0.89628 | ↓ | -0.158 | 0.045513 | 0.1787   | 1.8844  | ↑ | 0.9141 | 0.45857  | 0.67408  | 1.201   | ↑ | 0.2643 |
| SM220                  | 0.65817 | 0.97467 | 0.91833 | ↓ | -0.123 | 0.23645  | 0.95194 | 1.3197  | ↑ | 0.4002 | 0.10474  | 0.89093 | 1.4402  | ↑ | 0.5262 | 0.18595  | 0.38685  | 0.8848  | ↓ | -0.177 | 0.045895 | 0.16815  | 1.5165  | ↑ | 0.6007 |
| TAG545-FA183           | 0.66454 | 0.97467 | 0.44087 | ↓ | -1.182 | 0.83044  | 0.98297 | 0.71255 | ↓ | -0.489 | 0.86093  | 0.99953 | 0.93545 | ↓ | -0.096 | 0.50969  | 0.69355  | 0.8597  | ↓ | -0.218 | 0.029287 | 0.13417  | 1.4466  | ↑ | 0.5326 |
| TAG565-FA202           | 0.66462 | 0.97467 | 0.93639 | ↓ | -0.095 | 0.44845  | 0.97562 | 1.219   | ↑ | 0.2858 | 0.033116 | 0.7334  | 0.61283 | ↓ | -0.706 | 0.84538  | 0.91645  | 1.1265  | ↑ | 0.1719 | 0.46271  | 0.67408  | 1.3264  | ↑ | 0.4075 |
| TAG546-FA181           | 0.67089 | 0.97467 | 0.37913 | ↓ | -1.399 | 0.61504  | 0.97562 | 0.80997 | ↓ | -0.304 | 0.12779  | 0.91055 | 0.76907 | ↓ | -0.379 | 0.31349  | 0.52661  | 0.87099 | ↓ | -0.199 | 0.01264  | 0.092791 | 1.4373  | ↑ | 0.5233 |
| TAG563-FA181           | 0.67118 | 0.97467 | 1.0317  | ↑ | 0.045  | 0.86624  | 0.98297 | 1.0306  | ↑ | 0.0436 | 0.005613 | 0.59639 | 0.68527 | ↓ | -0.545 | 0.55845  | 0.73066  | 0.97941 | ↓ | -0.03  | 0.76766  | 0.90126  | 0.98935 | ↓ | -0.015 |
| TAG543-FA202           | 0.67617 | 0.97467 | 0.94295 | ↓ | -0.085 | 0.32346  | 0.95194 | 1.3068  | ↑ | 0.386  | 0.016823 | 0.62598 | 0.55495 | ↓ | -0.85  | 0.48139  | 0.67299  | 1.2084  | ↑ | 0.2731 | 0.52053  | 0.71418  | 1.3031  | ↑ | 0.3819 |
| TAG522-FA180           | 0.69741 | 0.97467 | 1.2879  | ↑ | 0.3651 | 0.6832   | 0.97562 | 0.56804 | ↓ | -0.816 | 0.67277  | 0.99953 | 1.1961  | ↑ | 0.2584 | 0.019138 | 0.1372   | 0.27893 | ↓ | -1.842 | 0.016388 | 0.10149  | 0.30475 | ↓ | -1.714 |
| TAG542-FA182           | 0.6977  | 0.97467 | 1.0697  | ↑ | 0.0972 | 0.86114  | 0.98297 | 0.99112 | ↓ | -0.013 | 0.50265  |         |         |   |        |          |          |         |   |        |          |          |         |   |        |



Supplementary Table S3B. List of dysregulated metabolites for male mice following exposure to 9.5 Gy of Gamma-radiation, 24 h, 1 week, 1 month, 3 month and 6 months post-irradiation.

|                                | 9.5Gy / 0.0Gy |         |         |        | 9.5Gy / 0.0Gy |          |         |         | 9.5Gy / 0.0Gy |        |          |         | 9.5Gy / 0.0Gy |     |        |          | 9.5Gy / 0.0Gy |         |    |        |          |         |         |   |        |
|--------------------------------|---------------|---------|---------|--------|---------------|----------|---------|---------|---------------|--------|----------|---------|---------------|-----|--------|----------|---------------|---------|----|--------|----------|---------|---------|---|--------|
|                                | 24h           |         |         |        | 1wk           |          |         |         | 1mo           |        |          |         | 3mo           |     |        |          | 6mo           |         |    |        |          |         |         |   |        |
|                                | Male          |         |         |        | Male          |          |         |         | Male          |        |          |         | Male          |     |        |          | Male          |         |    |        |          |         |         |   |        |
| name                           | p-value       | FDR     | FC      | LOG2FC | p-value       | FDR      | FC      | LOG2FC  | p-value       | FDR    | FC       | LOG2FC  | p-value       | FDR | FC     | LOG2FC   | p-value       | FDR     | FC | LOG2FC |          |         |         |   |        |
| CYSTEINE_neg_5                 | 0.005664      | 0.2407  | 2.4211  | ↑      | 1.2756        | 0.91515  | 0.99    | 1.144   | ↑             | 0.1941 | 0.86697  | 0.95387 | 1.5675        | ↑   | 0.6485 | 0.000531 | 0.22564       | 6.3248  | ↑  | 2.661  | 0.85351  | 0.96019 | 1.6482  | ↑ | 0.7209 |
| N-ACETYLGLUTAMINE_pos_2        | 0.18447       | 0.72412 | 2.3125  | ↑      | 1.2095        | 0.19463  | 0.89138 | 0.83612 | ↓             | -0.258 | 0.28843  | 0.67701 | 0.95505       | ↓   | -0.066 | 0.51279  | 0.99441       | 1.3436  | ↑  | 0.4261 | 0.005404 | 0.31319 | 0.33434 | ↓ | -1.581 |
| INDOLE-3-CARBOXYLIC ACID_neg_1 | 0.75207       | 0.9716  | 0.90106 | ↓      | -0.15         | 0.83391  | 0.97366 | 0.98555 | ↓             | -0.021 | 0.046714 | 0.42979 | 1.7823        | ↑   | 0.8338 | 0.47803  | 0.99441       | 1.1376  | ↑  | 0.186  | 0.32968  | 0.75069 | 1.4227  | ↑ | 0.5086 |
| CE204                          | 0.043996      | 0.58433 | 1.391   | ↑      | 0.4761        | 0.038224 | 0.52469 | 1.5625  | ↑             | 0.6439 | 0.67999  | 0.90614 | 0.12577       | ↓   | -2.991 | 0.70336  | 0.99441       | 0.97961 | ↓  | -0.03  | 0.084451 | 0.54839 | 1.4214  | ↑ | 0.5073 |
| OXOGLUTARATE_neg_2             | 0.46392       | 0.85354 | 0.52654 | ↓      | -0.925        | 0.45557  | 0.89138 | 1.9469  | ↑             | 0.9612 | 0.024106 | 0.345   | 0.67972       | ↓   | -0.557 | 0.42619  | 0.99441       | 0.76006 | ↓  | -0.396 | 0.021151 | 0.52879 | 0.36105 | ↓ | -1.47  |
| NORMETANEPHRINE_pos_1          | 0.008954      | 0.31711 | 2.5052  | ↑      | 1.3249        | 0.1644   | 0.87306 | 2.2393  | ↑             | 1.1631 | 0.072039 | 0.46976 | 2.1062        | ↑   | 1.0747 | 0.19608  | 0.99441       | 3.2913  | ↑  | 1.7187 | 0.77737  | 0.95228 | 0.97435 | ↓ | -0.037 |
| ASCORBATE_neg_2                | 0.15783       | 0.72412 | 1.0162  | ↑      | 0.0232        | 0.59089  | 0.90011 | 1.3082  | ↑             | 0.3876 | 0.017433 | 0.324   | 0.42884       | ↓   | -1.222 | 0.66707  | 0.99441       | 0.96939 | ↓  | -0.045 | 0.46266  | 0.8197  | 0.84056 | ↓ | -0.251 |
| N-GLYCYL-L-PROLINE_neg_3       | 0.39626       | 0.82612 | 0.35371 | ↓      | -1.499        | 0.83261  | 0.97366 | 1.2194  | ↑             | 0.2862 | 0.75347  | 0.9336  | 1.3441        | ↑   | 0.4267 | 0.8856   | 0.99441       | 1.1255  | ↑  | 0.1706 | 0.048501 | 0.54839 | 2.2647  | ↑ | 1.1793 |
| AMINOADIPATE_pos_1             | 0.022137      | 0.53437 | 2.2338  | ↑      | 1.1595        | 0.72449  | 0.9445  | 1.2051  | ↑             | 0.2691 | 0.090424 | 0.49525 | 0.6102        | ↓   | -0.713 | 0.39441  | 0.99441       | 1.3462  | ↑  | 0.4289 | 0.025556 | 0.54839 | 0.66344 | ↓ | -0.592 |
| CE226                          | 0.004853      | 0.2407  | 1.8434  | ↑      | 0.8824        | 0.09432  | 0.76624 | 1.5977  | ↑             | 0.676  | 0.4235   | 0.78215 | 0.33145       | ↓   | -1.593 | 0.024579 | 0.99441       | 1.7456  | ↑  | 0.8038 | 0.14148  | 0.58674 | 1.3325  | ↑ | 0.4142 |
| ACETYLPHOSPHATE_pos_1          | 0.80127       | 0.9716  | 0.96267 | ↓      | -0.055        | 0.48448  | 0.89138 | 0.84306 | ↓             | -0.246 | 0.091013 | 0.49525 | 0.7124        | ↓   | -0.489 | 0.61462  | 0.99441       | 1.157   | ↑  | 0.2104 | 0.005155 | 0.31319 | 0.56029 | ↓ | -0.836 |
| ATROLACTIC ACID_neg_2          | 0.99955       | 0.99955 | 0.84269 | ↓      | -0.247        | 0.72382  | 0.9445  | 1.0156  | ↑             | 0.0224 | 0.005527 | 0.24745 | 2.1122        | ↑   | 1.0788 | 0.29773  | 0.99441       | 1.5064  | ↑  | 0.5912 | 0.16212  | 0.60235 | 2.4597  | ↑ | 1.2985 |
| TAG582-FA181                   | 0.09492       | 0.72412 | 0.71668 | ↓      | -0.481        | 0.11025  | 0.76624 | 1.339   | ↑             | 0.4212 | 0.42251  | 0.78215 | 0.92405       | ↓   | -0.114 | 0.53628  | 0.99441       | 1.0416  | ↑  | 0.0587 | 0.034434 | 0.54839 | 1.5972  | ↑ | 0.6756 |
| TAG483-FA182                   | 0.25655       | 0.77754 | 0.92598 | ↓      | -0.111        | 0.38783  | 0.89138 | 0.88273 | ↓             | -0.18  | 0.43582  | 0.78215 | 0.77479       | ↓   | -0.368 | 0.84085  | 0.99441       | 1.005   | ↑  | 0.0072 | 0.026097 | 0.54839 | 0.85848 | ↓ | -0.22  |
| OROTATE_neg_1                  | 0.061379      | 0.67761 | 1.7334  | ↑      | 0.7936        | 0.022658 | 0.38519 | 0.73303 | ↓             | -0.448 | 0.9845   | 0.99242 | 0.89922       | ↓   | -0.153 | 0.24315  | 0.99441       | 0.66598 | ↓  | -0.586 | 0.80426  | 0.95228 | 1.3936  | ↑ | 0.4788 |
| DCER260                        | 0.040208      | 0.55896 | 0.6432  | ↓      | -0.637        | 0.27259  | 0.89138 | 1.1914  | ↑             | 0.2526 | 0.41869  | 0.78215 | 0.91296       | ↓   | -0.131 | 0.70868  | 0.99441       | 1.2663  | ↑  | 0.3406 | 0.54259  | 0.85329 | 1.0948  | ↑ | 0.1307 |
| CE180                          | 0.894         | 0.9716  | 1.0521  | ↑      | 0.0733        | 0.013503 | 0.37637 | 1.3897  | ↑             | 0.4747 | 0.36579  | 0.74028 | 1.0266        | ↑   | 0.0378 | 0.47895  | 0.99441       | 1.0303  | ↑  | 0.043  | 0.51724  | 0.85329 | 1.014   | ↑ | 0.0201 |
| TAG442-FA182                   | 0.11927       | 0.72412 | 0.76512 | ↓      | -0.386        | 0.54073  | 0.89728 | 1.0797  | ↑             | 0.1106 | 0.051775 | 0.43146 | 1.5234        | ↑   | 0.6073 | 0.81652  | 0.99441       | 0.96922 | ↓  | -0.045 | 0.035444 | 0.54839 | 0.79976 | ↓ | -0.322 |
| L-ACETYL CARNITINE_pos_1       | 0.3282        | 0.7915  | 1.2559  | ↑      | 0.3287        | 0.005753 | 0.27165 | 0.41131 | ↓             | -1.282 | 0.33513  | 0.72506 | 0.69525       | ↓   | -0.524 | 0.19475  | 0.99441       | 2.1224  | ↑  | 1.0857 | 0.49087  | 0.84804 | 2.1329  | ↑ | 1.0928 |
| ADP_pos_1                      | 0.075926      | 0.67761 | 1.4224  | ↑      | 0.5083        | 0.001556 | 0.13259 | 2.0516  | ↑             | 1.0367 | 0.000562 | 0.1195  | 1.9971        | ↑   | 0.9979 | 0.0319   | 0.99441       | 2.3289  | ↑  | 1.2197 | 0.2891   | 0.70059 | 1.5376  | ↑ | 0.6207 |
| 3-METHYLAMINO-L-ALANINE_pos_2  | 0.038541      | 0.55896 | 2.5148  | ↑      | 1.3305        | 0.58724  | 0.89995 | 1.228   | ↑             | 0.2963 | 0.44136  | 0.78215 | 0.83707       | ↓   | -0.257 | 0.62894  | 0.99441       | 0.93134 | ↓  | -0.103 | 0.41639  | 0.81279 | 1.4284  | ↑ | 0.5144 |
| TAG540-FA180                   | 0.1292        | 0.72412 | 0.82766 | ↓      | -0.273        | 0.79674  | 0.97366 | 1.0504  | ↑             | 0.071  | 0.03379  | 0.39891 | 1.2946        | ↑   | 0.3725 | 0.76538  | 0.99441       | 0.99322 | ↓  | -0.01  | 0.80566  | 0.95228 | 0.99175 | ↓ | -0.012 |
| TAG421-FA160                   | 0.76067       | 0.9716  | 1.023   | ↑      | 0.0328        | 0.37964  | 0.89138 | 1.1109  | ↑             | 0.1517 | 0.042192 | 0.42979 | 1.6608        | ↑   | 0.7319 | 0.66963  | 0.99441       | 0.906   | ↓  | -0.142 | 0.012815 | 0.39402 | 0.78174 | ↓ | -0.355 |
| TAG442-FA181                   | 0.92254       | 0.9716  | 1.0032  | ↑      | 0.0046        | 0.65892  | 0.93511 | 1.1219  | ↑             | 0.166  | 0.033603 | 0.39891 | 1.8674        | ↑   | 0.901  | 0.72497  | 0.99441       | 1.012   | ↑  | 0.0173 | 0.39437  | 0.79813 | 0.82693 | ↓ | -0.274 |
| TAG442-FA160                   | 0.92132       | 0.9716  | 1.1266  | ↑      | 0.172         | 0.82749  | 0.97366 | 0.98908 | ↓             | -0.016 | 0.045606 | 0.42979 | 1.2323        | ↑   | 0.3014 | 0.26061  | 0.99441       | 0.87195 | ↓  | -0.198 | 0.13597  | 0.58674 | 0.87814 | ↓ | -0.187 |
| TAG567-FA226                   | 0.001595      | 0.14065 | 2.6904  | ↑      | 1.4278        | 0.27794  | 0.89138 | 1.1056  | ↑             | 0.1448 | 0.8755   | 0.95387 | 0.60537       | ↓   | -0.724 | 0.82081  | 0.99441       | 0.99042 | ↓  | -0.014 | 0.078084 | 0.54839 | 1.4356  | ↑ | 0.5217 |
| CE160                          | 0.63131       | 0.95315 | 0.92339 | ↓      | -0.115        | 0.032234 | 0.50675 | 1.2872  | ↑             | 0.3643 | 0.67856  | 0.90614 | 0.60487       | ↓   | -0.725 | 0.81699  | 0.99441       | 0.97673 | ↓  | -0.034 | 0.005839 | 0.31319 | 0.84232 | ↓ | -0.248 |
| TAG480-FA140                   | 0.89013       | 0.9716  | 1.0493  | ↑      | 0.0695        | 0.89919  | 0.99    | 1.0091  | ↑             | 0.0131 | 0.21087  | 0.64834 | 1.1161        | ↑   | 0.1585 | 0.29476  | 0.99441       | 0.92045 | ↓  | -0.12  | 0.045149 | 0.54839 | 0.8921  | ↓ | -0.165 |
| TAG504-FA181                   | 0.22909       | 0.76067 | 0.82304 | ↓      | -0.281        | 0.007712 | 0.27531 | 1.402   | ↑             | 0.4875 | 0.94612  | 0.97597 | 0.95349       | ↓   | -0.069 | 0.42151  | 0.99441       | 1.112   | ↑  | 0.1531 | 0.54977  | 0.85329 | 1.1047  | ↑ | 0.1437 |
| FFA141                         | 0.65333       | 0.96411 | 1.2049  | ↑      | 0.2689        | 0.10912  | 0.76624 | 1.373   | ↑             | 0.4573 | 0.045581 | 0.42979 | 1.397         | ↑   | 0.4824 | 0.25313  | 0.99441       | 1.2098  | ↑  | 0.2747 | 0.29978  | 0.7067  | 1.3785  | ↑ | 0.46   |

|                      |          |         |         |   |        |          |         |         |   |        |          |         |         |   |        |         |         |         |   |        |          |         |         |   |        |
|----------------------|----------|---------|---------|---|--------|----------|---------|---------|---|--------|----------|---------|---------|---|--------|---------|---------|---------|---|--------|----------|---------|---------|---|--------|
| CE205                | 0.025904 | 0.53437 | 0.62916 | ↓ | -0.669 | 0.038271 | 0.52469 | 1.6774  | ↑ | 0.7462 | 0.65328  | 0.90438 | 0.3005  | ↓ | -1.735 | 0.22127 | 0.99441 | 1.3039  | ↑ | 0.3828 | 0.78678  | 0.95228 | 0.97992 | ↓ | -0.029 |
| O-ACETYLSERINE_pos_3 | 0.18715  | 0.72412 | 2.0492  | ↑ | 1.0351 | 0.048402 | 0.59454 | 0.73532 | ↓ | -0.444 | 0.40671  | 0.77512 | 0.72612 | ↓ | -0.462 | 0.82674 | 0.99441 | 1.0636  | ↑ | 0.0889 | 0.90894  | 0.96019 | 1.0129  | ↑ | 0.0185 |
| TAG544-FA183         | 0.20675  | 0.72412 | 0.76318 | ↓ | -0.39  | 0.30285  | 0.89138 | 1.5735  | ↑ | 0.654  | 0.48649  | 0.8154  | 0.59663 | ↓ | -0.745 | 0.54046 | 0.99441 | 1.1352  | ↑ | 0.1829 | 0.041117 | 0.54839 | 1.5314  | ↑ | 0.6148 |
| TAG502-FA182         | 0.001212 | 0.14065 | 1.3434  | ↑ | 0.4259 | 0.53752  | 0.89587 | 0.99988 | ↓ | -2E-04 | 0.24289  | 0.64952 | 0.69552 | ↓ | -0.524 | 0.69353 | 0.99441 | 0.98149 | ↓ | -0.027 | 0.41899  | 0.81279 | 0.9415  | ↓ | -0.087 |
| TAG524-FA161         | 0.025975 | 0.53437 | 1.3428  | ↑ | 0.4252 | 0.37498  | 0.89138 | 0.93278 | ↓ | -0.1   | 0.16365  | 0.59496 | 0.40092 | ↓ | -1.319 | 0.64863 | 0.99441 | 0.92973 | ↓ | -0.105 | 0.46289  | 0.8197  | 0.89102 | ↓ | -0.166 |
| TAG502-FA140         | 0.53182  | 0.88822 | 1.0953  | ↑ | 0.1313 | 0.86496  | 0.986   | 0.98865 | ↓ | -0.016 | 0.8158   | 0.94216 | 0.81193 | ↓ | -0.301 | 0.70852 | 0.99441 | 0.9675  | ↓ | -0.048 | 0.046    | 0.54839 | 0.86154 | ↓ | -0.215 |
| TAG461-FA180         | 0.28656  | 0.78188 | 0.84951 | ↓ | -0.235 | 0.5835   | 0.89995 | 1.1023  | ↑ | 0.1405 | 0.008251 | 0.25047 | 1.4686  | ↑ | 0.5545 | 0.20628 | 0.99441 | 0.88423 | ↓ | -0.178 | 0.25887  | 0.67735 | 0.8758  | ↓ | -0.191 |
| MYOINOSITOL_neg_3    | 0.69403  | 0.9716  | 0.55353 | ↓ | -0.853 | 0.50361  | 0.89138 | 0.84704 | ↓ | -0.239 | 0.012975 | 0.31736 | 0.58412 | ↓ | -0.776 | 0.49663 | 0.99441 | 0.62893 | ↓ | -0.669 | 0.69708  | 0.91156 | 0.67767 | ↓ | -0.561 |
| ASPARTATE_pos_3      | 0.25997  | 0.77754 | 1.2131  | ↑ | 0.2787 | 0.58481  | 0.89995 | 0.9979  | ↓ | -0.003 | 0.030484 | 0.38105 | 1.4773  | ↑ | 0.563  | 0.15291 | 0.99441 | 1.5975  | ↑ | 0.6758 | 0.060721 | 0.54839 | 1.4918  | ↑ | 0.577  |
| TAG472-FA182         | 0.19253  | 0.72412 | 0.85769 | ↓ | -0.221 | 0.92084  | 0.99    | 0.96578 | ↓ | -0.05  | 0.41407  | 0.78213 | 1.0062  | ↑ | 0.009  | 0.56608 | 0.99441 | 1.1004  | ↑ | 0.1381 | 0.007358 | 0.34678 | 0.84219 | ↓ | -0.248 |
| TAG568-FA204         | 0.50722  | 0.87452 | 0.91645 | ↓ | -0.126 | 0.27862  | 0.89138 | 1.0917  | ↑ | 0.1265 | 0.043545 | 0.42979 | 1.2326  | ↑ | 0.3017 | 0.72618 | 0.99441 | 1.0258  | ↑ | 0.0367 | 0.55676  | 0.85329 | 1.9027  | ↑ | 0.928  |
| SM240                | 0.19681  | 0.72412 | 0.90956 | ↓ | -0.137 | 0.003548 | 0.25129 | 2.4871  | ↑ | 1.3145 | 0.125    | 0.52084 | 1.338   | ↑ | 0.42   | 0.80761 | 0.99441 | 0.96977 | ↓ | -0.044 | 0.68687  | 0.90885 | 1.115   | ↑ | 0.1571 |



Supplementary Table S3C. List of dysregulated metabolites for wildtype mice following exposure to 9.5 Gy of Gamma-radiation, 24 h, 1 week, 1 month, 3 month and 6 months post-irradiation.

|                                | 9.5Gy / 0.0Gy |         |         |          | 9.5Gy / 0.0Gy |         |         |          | 9.5Gy / 0.0Gy |          |         |          | 9.5Gy / 0.0Gy |         |         |          | 9.5Gy / 0.0Gy |          |         |          |
|--------------------------------|---------------|---------|---------|----------|---------------|---------|---------|----------|---------------|----------|---------|----------|---------------|---------|---------|----------|---------------|----------|---------|----------|
|                                | 24h           |         |         |          | 1wk           |         |         |          | 1mo           |          |         |          | 3mo           |         |         |          | 6mo           |          |         |          |
|                                |               |         |         |          |               |         |         |          | WildType      |          |         |          |               |         |         |          |               |          |         |          |
| name                           | p-value       | FDR     | FC      | LOG2FC   | p-value       | FDR     | FC      | LOG2FC   | p-value       | FDR      | FC      | LOG2FC   | p-value       | FDR     | FC      | LOG2FC   | p-value       | FDR      | FC      | LOG2FC   |
| XANTHOSINE_neg_1               | 0.001628      | 0.27225 | 2.5482  | 1.3495   | 0.11152       | 0.92112 | 1.3709  | 0.45509  | 0.078053      | 0.23527  | 1.5013  | 0.58618  | 0.44197       | 0.87102 | 0.5508  | -0.86041 | 0.49426       | 0.70254  | 0.97529 | -0.03609 |
| CYSTEINE_neg_5                 | 0.009274      | 0.42014 | 2.3964  | 1.2609   | 0.22642       | 0.92112 | 1.5092  | 0.59382  | 0.60859       | 0.77209  | 1.7783  | 0.83053  | 0.068388      | 0.80329 | 3.534   | 1.8213   | 0.45323       | 0.67019  | 0.83194 | -0.26545 |
| PYROPHOSPHATE_neg_3            | 0.013629      | 0.42014 | 4.7208  | 2.239    | 0.48252       | 0.95381 | 3.4897  | 1.8031   | 0.42327       | 0.62738  | 2.1417  | 1.0988   | 0.64663       | 0.90034 | 1.0507  | 0.071371 | 0.59565       | 0.76819  | 1.3075  | 0.38682  |
| N-ACETYLGUTAMINE_pos_2         | 0.001922      | 0.27225 | 5.8258  | 2.5425   | 0.46214       | 0.93084 | 0.7982  | -0.32518 | 0.7206        | 0.84835  | 1.2416  | 0.31224  | 0.67318       | 0.90034 | 1.2764  | 0.35211  | 0.15534       | 0.43149  | 1.0154  | 0.022023 |
| CE204                          | 0.001529      | 0.27225 | 2.6901  | 1.4277   | 0.16872       | 0.92112 | 1.5095  | 0.59408  | 0.7694        | 0.86278  | 0.13108 | -2.9314  | 0.33517       | 0.85641 | 0.87976 | -0.18482 | 0.97004       | 0.98244  | 0.92129 | -0.11827 |
| OXOGLUTARATE_neg_2             | 0.46008       | 0.93557 | 0.12072 | -3.0503  | 0.71953       | 0.96398 | 0.38294 | -1.3848  | 0.1653        | 0.36589  | 0.85051 | -0.2336  | 0.17878       | 0.80329 | 0.66721 | -0.58379 | 0.004073      | 0.096167 | 0.44246 | -1.1764  |
| NORMETANEPHRINE_pos_1          | 0.03033       | 0.51706 | 2.3156  | 1.2114   | 0.68153       | 0.96398 | 1.4455  | 0.53156  | 0.15034       | 0.35011  | 3.001   | 1.5854   | 0.57118       | 0.89473 | 0.90455 | -0.14472 | 0.86848       | 0.93681  | 1.1874  | 0.24781  |
| ASCORBATE_neg_2                | 0.016726      | 0.42014 | 2.4919  | 1.3173   | 0.15216       | 0.92112 | 1.9249  | 0.94479  | 0.072301      | 0.22594  | 0.43997 | -1.1845  | 0.53761       | 0.89334 | 0.91183 | -0.13317 | 0.14617       | 0.42261  | 0.6195  | -0.69083 |
| ACETYL-COA_pos_1               | 0.015224      | 0.42014 | 2.2577  | 1.1749   | 0.5689        | 0.96398 | 0.86268 | -0.2131  | 0.97108       | 0.9803   | 0.97645 | -0.03439 | 0.064487      | 0.80329 | 0.48002 | -1.0588  | 0.64247       | 0.81024  | 1.1514  | 0.20336  |
| AMINOADIPATE_pos_1             | 0.01987       | 0.42014 | 2.3907  | 1.2574   | 0.83039       | 0.9749  | 0.75565 | -0.40421 | 0.67528       | 0.82234  | 1.0614  | 0.085907 | 0.85965       | 0.97168 | 1.1475  | 0.19846  | 0.31058       | 0.5617   | 1.6698  | 0.73971  |
| CE226                          | 0.031632      | 0.51706 | 1.654   | 0.72599  | 0.78942       | 0.9749  | 1.1942  | 0.25603  | 0.59522       | 0.77209  | 0.26626 | -1.9091  | 0.20003       | 0.80329 | 1.4064  | 0.49198  | 0.46203       | 0.67413  | 1.2804  | 0.35663  |
| TAG566-FA225                   | 0.43103       | 0.92598 | 0.90211 | -0.14862 | 0.14018       | 0.92112 | 0.7194  | -0.47513 | 0.90521       | 0.94062  | 0.65659 | -0.06094 | 0.026794      | 0.80329 | 0.55359 | -0.8531  | 0.48543       | 0.69231  | 0.88227 | -0.1807  |
| GERANYL-PP_HPO3_neg_2          | 0.026683      | 0.49306 | 1.7411  | 0.79997  | 0.57723       | 0.96398 | 1.5458  | 0.62831  | 0.6602        | 0.81329  | 0.80591 | -0.31131 | 0.93103       | 0.98186 | 1.2262  | 0.29425  | 0.57358       | 0.75705  | 0.96765 | -0.04745 |
| TAG544-FA224                   | 0.044573      | 0.60334 | 1.3326  | 0.41422  | 0.1947        | 0.92112 | 1.5742  | 0.65464  | 0.028438      | 0.12722  | 1.7612  | 0.81652  | 0.62928       | 0.90034 | 0.9173  | -0.12454 | 0.50995       | 0.71527  | 1.07    | 0.097653 |
| ACETYLPHOSPHATE_pos_1          | 0.083378      | 0.6741  | 0.42353 | -1.2395  | 0.93486       | 0.98807 | 0.98919 | -0.01568 | 0.66573       | 0.81538  | 0.86834 | -0.20366 | 0.88585       | 0.97744 | 1.2289  | 0.29732  | 0.004015      | 0.096167 | 0.60446 | -0.72628 |
| TAG565-FA181                   | 0.84697       | 0.99234 | 0.88768 | -0.17189 | 0.74326       | 0.96398 | 0.46684 | -1.099   | 0.56901       | 0.76038  | 0.92283 | -0.11586 | 0.033546      | 0.80329 | 0.22613 | -2.1448  | 0.030879      | 0.26735  | 0.18395 | -2.4426  |
| TAG501-FA140                   | 0.98838       | 0.99794 | 1.0621  | 0.086871 | 0.031027      | 0.92112 | 0.69763 | -0.51946 | 0.56211       | 0.76038  | 0.9058  | -0.14274 | 0.82156       | 0.96459 | 1.0081  | 0.011658 | 0.52346       | 0.72467  | 0.91544 | -0.12747 |
| TAG527-FA160                   | 0.017205      | 0.42014 | 0.83746 | -0.25591 | 0.50303       | 0.96398 | 1.0872  | 0.12064  | 0.33261       | 0.56544  | 1.2071  | 0.27153  | 0.36532       | 0.86725 | 0.77906 | -0.36018 | 0.44956       | 0.66918  | 0.89842 | -0.15454 |
| TAG545-FA205                   | 0.034846      | 0.5218  | 0.51974 | -0.94413 | 0.83898       | 0.97588 | 1.0426  | 0.060126 | 0.42367       | 0.62738  | 1.4898  | 0.57516  | 0.54921       | 0.89371 | 0.87297 | -0.196   | 0.5916        | 0.76819  | 0.85403 | -0.22765 |
| TAG483-FA182                   | 0.62524       | 0.98776 | 0.97133 | -0.04197 | 0.18543       | 0.92112 | 0.87339 | -0.1953  | 0.003112      | 0.045599 | 0.447   | -1.1616  | 0.51879       | 0.89334 | 1.052   | 0.073198 | 0.083354      | 0.34394  | 0.88571 | -0.1751  |
| OROTATE_neg_1                  | 0.047338      | 0.60966 | 2.1738  | 1.1202   | 0.40096       | 0.92112 | 0.76624 | -0.38413 | 0.50256       | 0.71196  | 0.73909 | -0.43617 | 0.89862       | 0.97744 | 1.1083  | 0.1484   | 0.34749       | 0.57989  | 1.3213  | 0.40195  |
| DAG160/204                     | 0.31142       | 0.9255  | 1.595   | 0.67357  | 0.12597       | 0.92112 | 1.3885  | 0.47349  | 0.002835      | 0.043037 | 3.0526  | 1.61     | 0.92574       | 0.98083 | 0.88028 | -0.18397 | 0.052165      | 0.29221  | 2.031   | 1.0222   |
| ADP_pos_1                      | 0.47752       | 0.94066 | 1.2192  | 0.28594  | 0.05453       | 0.92112 | 1.549   | 0.63137  | 0.031983      | 0.1373   | 1.7857  | 0.8365   | 0.44268       | 0.87102 | 1.5749  | 0.65523  | 0.80667       | 0.90302  | 0.96157 | -0.05654 |
| SM160                          | 0.92107       | 0.99234 | 0.8225  | -0.28191 | 0.17776       | 0.92112 | 1.5072  | 0.59191  | 0.011652      | 0.078206 | 1.749   | 0.80657  | 0.40719       | 0.87102 | 1.3846  | 0.46946  | 0.073545      | 0.33329  | 1.2898  | 0.3671   |
| TAG564-FA204                   | 0.29613       | 0.9254  | 0.7964  | -0.32844 | 0.23162       | 0.92112 | 1.4402  | 0.52629  | 0.001354      | 0.034775 | 3.1709  | 1.6649   | 0.16757       | 0.80329 | 0.61967 | -0.69043 | 0.68288       | 0.82921  | 0.94501 | -0.0816  |
| PYRIDOXAMINE_pos_1             | 0.010487      | 0.42014 | 2.0965  | 1.068    | 0.20163       | 0.92112 | 0.59765 | -0.74263 | 0.57073       | 0.76038  | 1.7007  | 0.76609  | 0.32963       | 0.85641 | 0.44386 | -1.1718  | 0.58985       | 0.76819  | 1.2093  | 0.27416  |
| L-2-HYDROXYGLUTARIC ACID_neg_1 | 0.14301       | 0.74123 | 0.24129 | -2.0511  | 0.085548      | 0.92112 | 1.1306  | 0.17707  | 0.024261      | 0.11208  | 0.43151 | -1.2125  | 0.2151        | 0.80329 | 0.7959  | -0.32934 | 0.057669      | 0.29221  | 1.9511  | 0.96429  |
| CE181                          | 0.40887       | 0.92598 | 1.0504  | 0.070873 | 0.49013       | 0.95869 | 0.91846 | -0.12271 | 0.25255       | 0.49272  | 0.10209 | -3.2921  | 0.76859       | 0.95473 | 0.98459 | -0.0224  | 0.001603      | 0.096167 | 0.73912 | -0.43613 |
| TAG568-FA161                   | 0.65752       | 0.98776 | 1.1818  | 0.24098  | 0.023568      | 0.92112 | 1.494   | 0.57915  | 0.1556        | 0.35553  | 0.54427 | -0.8776  | 0.16791       | 0.80329 | 1.2782  | 0.35415  | 0.36021       | 0.58919  | 1.1827  | 0.24211  |
| FAA201                         | 0.38907       | 0.92598 | 0.92572 | -0.11135 | 0.1508        | 0.92112 | 1.2616  | 0.33525  | 0.01806       | 0.094674 | 1.8038  | 0.85103  | 0.65266       | 0.90034 | 0.94045 | -0.08857 | 0.84349       | 0.92216  | 1.0191  | 0.027303 |
| IMIDAZOLE_pos_1                | 0.016685      | 0.42014 | 1.498   | 0.58302  | 0.67253       | 0.96398 | 0.89698 | -0.15686 | 0.23953       | 0.47794  | 1.9621  | 0.97243  | 0.99526       | 0.99678 | 1.0536  | 0.075385 | 0.13639       | 0.40298  | 1.4032  | 0.48869  |
| 3-METHYLAMINO-L-ALANINE_pos_2  | 0.044661      | 0.60334 | 2.146   | 1.1017   | 0.23078       | 0.92112 | 1.3866  | 0.47156  | 0.19439       | 0.41308  | 0.6455  | -0.63151 | 0.40932       | 0.87102 | 0.78995 | -0.34016 | 0.19179       | 0.47815  | 2.3113  | 1.2087   |
| FFA182                         | 0.54201       | 0.94319 | 1.0997  | 0.1371   | 0.38795       | 0.92112 | 1.1013  | 0.13919  | 0.015176      | 0.084864 | 2.1363  | 1.0951   | 0.89143       | 0.97744 | 0.9823. |          |               |          |         |          |



|                              |          |         |         |          |          |         |         |          |          |          |         |          |          |         |         |          |          |          |          |          |
|------------------------------|----------|---------|---------|----------|----------|---------|---------|----------|----------|----------|---------|----------|----------|---------|---------|----------|----------|----------|----------|----------|
| TAG563-FA201                 | 0.076603 | 0.67266 | 0.73896 | -0.43644 | 0.19351  | 0.92112 | 0.73015 | -0.45374 | 0.42     | 0.62631  | 1.0784  | 0.10895  | 0.016958 | 0.80329 | 0.52875 | -0.91934 | 0.53879  | 0.74054  | 0.65778  | -0.60433 |
| TAG482-FA161                 | 0.94473  | 0.99234 | 1.0048  | 0.006848 | 0.97763  | 0.99639 | 1.0034  | 0.004873 | 0.000921 | 0.034775 | 0.4115  | -1.281   | 0.66026  | 0.90034 | 1.1187  | 0.1618   | 0.35976  | 0.58919  | 1.0522   | 0.073447 |
| TAG561-FA181                 | 0.21035  | 0.86797 | 0.89594 | -0.15853 | 0.20303  | 0.92112 | 0.89893 | -0.15372 | 0.007234 | 0.062783 | 1.3749  | 0.45938  | 0.063349 | 0.80329 | 0.83165 | -0.26595 | 0.34688  | 0.57989  | 1.086    | 0.11898  |
| DAG180/181                   | 0.39378  | 0.92598 | 0.90601 | -0.14241 | 0.23712  | 0.92112 | 1.2453  | 0.31651  | 0.002221 | 0.036301 | 1.8389  | 0.87884  | 0.55486  | 0.89473 | 0.97074 | -0.04284 | 0.03541  | 0.26873  | 1.2147   | 0.28064  |
| TAG534-FA160                 | 0.59759  | 0.9647  | 1.1662  | 0.22186  | 0.71098  | 0.96398 | 1.0243  | 0.034569 | 0.14184  | 0.34126  | 1.2723  | 0.34749  | 0.003111 | 0.80329 | 0.62719 | -0.67301 | 0.93567  | 0.96751  | 0.96532  | -0.05092 |
| FFA202                       | 0.96813  | 0.99386 | 0.99542 | -0.00663 | 0.39598  | 0.92112 | 1.1703  | 0.22693  | 0.011668 | 0.078206 | 1.8895  | 0.91797  | 0.53695  | 0.89334 | 0.89144 | -0.16579 | 0.96204  | 0.98058  | 0.99728  | -0.00393 |
| TAG543-FA183                 | 0.25953  | 0.9166  | 1.1342  | 0.18169  | 0.52151  | 0.96398 | 1.3205  | 0.40111  | 0.020686 | 0.10105  | 1.7908  | 0.84058  | 0.50476  | 0.88646 | 0.82433 | -0.2787  | 0.33532  | 0.57989  | 1.0612   | 0.085744 |
| TAG522-FA181                 | 0.96131  | 0.99234 | 1.0174  | 0.024866 | 0.095898 | 0.92112 | 0.61277 | -0.70658 | 0.62849  | 0.79261  | 0.31644 | -1.66    | 0.23267  | 0.80329 | 0.69644 | -0.52192 | 0.026677 | 0.26272  | 0.45836  | -1.1254  |
| TAG503-FA140                 | 0.65354  | 0.98776 | 0.96605 | -0.04983 | 0.045355 | 0.92112 | 0.67282 | -0.5717  | 0.3639   | 0.58809  | 0.36896 | -1.4385  | 0.32053  | 0.85641 | 0.64802 | -0.6259  | 0.073224 | 0.33329  | 0.53306  | -0.90762 |
| TAG541-FA180                 | 0.51512  | 0.94319 | 0.92579 | -0.11124 | 0.057131 | 0.92112 | 0.53733 | -0.89612 | 0.05133  | 0.18271  | 1.8964  | 0.92324  | 0.33277  | 0.85641 | 0.73411 | -0.44594 | 0.008056 | 0.1261   | 0.39852  | -1.3273  |
| TAG484-FA182                 | 0.38058  | 0.92598 | 0.8373  | -0.25619 | 0.82165  | 0.9749  | 0.97048 | -0.04323 | 0.002352 | 0.03702  | 0.45147 | -1.1473  | 0.9685   | 0.99429 | 0.97975 | -0.02952 | 0.093559 | 0.35502  | 1.5484   | 0.6308   |
| TAG541-FA200                 | 0.55359  | 0.94319 | 0.97238 | -0.04041 | 0.73852  | 0.96398 | 0.82258 | -0.28177 | 0.4447   | 0.64948  | 0.5134  | -0.96185 | 0.24178  | 0.80329 | 0.70952 | -0.49508 | 0.044217 | 0.29047  | 0.46003  | -1.1202  |
| TAG589-FA181                 | 0.87201  | 0.99234 | 1.194   | 0.25585  | 0.30213  | 0.92112 | 1.2943  | 0.37214  | 0.73659  | 0.85584  | 1.1567  | 0.20996  | 0.29659  | 0.82929 | 0.79788 | -0.32575 | 0.028435 | 0.26272  | 0.59051  | -0.75997 |
| TAG531-FA180                 | 0.30289  | 0.9255  | 0.9415  | -0.08697 | 0.84025  | 0.97588 | 0.98616 | -0.02011 | 0.29391  | 0.53841  | 1.2422  | 0.31287  | 0.46237  | 0.8754  | 0.95634 | -0.0644  | 0.031453 | 0.26735  | 0.77761  | -0.36287 |
| TAG500-FA180                 | 0.006078 | 0.42014 | 0.86317 | -0.21229 | 0.45448  | 0.93084 | 1.1364  | 0.18452  | 0.016742 | 0.090065 | 1.6122  | 0.68906  | 0.2717   | 0.80751 | 0.83566 | -0.25902 | 0.20386  | 0.48949  | 0.88281  | -0.17982 |
| TAG542-FA180                 | 0.77072  | 0.99234 | 0.9585  | -0.06116 | 0.23161  | 0.92112 | 0.59484 | -0.74943 | 0.46731  | 0.67553  | 1.0519  | 0.073049 | 0.20741  | 0.80329 | 0.63983 | -0.64424 | 0.039646 | 0.2813   | 0.39591  | -1.3368  |
| TAG483-FA160                 | 0.72415  | 0.99234 | 0.97351 | -0.03873 | 0.82427  | 0.9749  | 0.90318 | -0.14691 | 0.01844  | 0.094674 | 0.46778 | -1.0961  | 0.44908  | 0.87149 | 0.76779 | -0.38121 | 0.91457  | 0.95784  | 0.95582  | -0.06519 |
| TAG542-FA181                 | 0.82707  | 0.99234 | 0.98907 | -0.01586 | 0.12071  | 0.92112 | 0.58357 | -0.77701 | 0.74394  | 0.85584  | 0.83847 | -0.25417 | 0.25663  | 0.80329 | 0.66854 | -0.58091 | 0.033482 | 0.26873  | 0.41958  | -1.253   |
| SM241                        | 0.44447  | 0.92598 | 0.74561 | -0.4235  | 0.002567 | 0.92112 | 1.6029  | 0.68071  | 0.063017 | 0.2029   | 1.3638  | 0.44765  | 0.9511   | 0.99024 | 1.1289  | 0.17488  | 0.86787  | 0.93681  | 1.092    | 0.12695  |
| DAG181/182                   | 0.52274  | 0.94319 | 1.056   | 0.078661 | 0.21341  | 0.92112 | 1.174   | 0.23149  | 0.01359  | 0.0835   | 1.4798  | 0.56538  | 0.57262  | 0.89473 | 0.96239 | -0.05531 | 0.025411 | 0.26272  | 1.2236   | 0.29109  |
| SM220                        | 0.48676  | 0.94275 | 1.1078  | 0.14772  | 0.091906 | 0.92112 | 1.5475  | 0.6299   | 0.076406 | 0.23195  | 1.7002  | 0.76567  | 0.73087  | 0.93436 | 1.0035  | 0.004998 | 0.034601 | 0.26873  | 1.7012   | 0.76654  |
| DAG180/182                   | 0.076903 | 0.67266 | 1.328   | 0.4093   | 0.20256  | 0.92112 | 1.3364  | 0.41838  | 0.000198 | 0.034775 | 2.6516  | 1.4069   | 0.53461  | 0.89334 | 1.0804  | 0.1115   | 0.047909 | 0.29087  | 1.3912   | 0.47635  |
| TAG545-FA183                 | 0.39959  | 0.92598 | 1.1009  | 0.1387   | 0.69833  | 0.96398 | 1.1227  | 0.16699  | 0.5807   | 0.76365  | 0.67948 | -0.5575  | 0.66511  | 0.90034 | 1.1656  | 0.22107  | 0.008308 | 0.1261   | 1.384    | 0.46886  |
| TAG565-FA202                 | 0.65405  | 0.98776 | 0.88238 | -0.18052 | 0.42939  | 0.92414 | 1.2167  | 0.283    | 0.007386 | 0.062783 | 1.8278  | 0.87009  | 0.19602  | 0.80329 | 0.84806 | -0.23776 | 0.41942  | 0.6412   | 0.85687  | -0.22285 |
| ANTHRANILIC ACID_pos_4       | 0.5369   | 0.94319 | 0.96264 | -0.05493 | 0.61153  | 0.96398 | 1.159   | 0.21293  | 0.013071 | 0.081695 | 0.49703 | -1.0086  | 0.97695  | 0.9957  | 0.92017 | -0.12002 | 0.7234   | 0.85879  | 1.2762   | 0.35182  |
| TAG546-FA181                 | 0.41189  | 0.92598 | 1.0867  | 0.11989  | 0.25535  | 0.92112 | 1.2996  | 0.37807  | 0.24662  | 0.4875   | 1.0524  | 0.073656 | 0.99581  | 0.99678 | 1.1278  | 0.17346  | 0.002839 | 0.096167 | 1.4831   | 0.56858  |
| TAG481-FA160                 | 0.75764  | 0.99234 | 1.0159  | 0.02279  | 0.092836 | 0.92112 | 0.84162 | -0.24875 | 0.006095 | 0.062783 | 0.53072 | -0.91397 | 0.99163  | 0.99678 | 1.0042  | 0.00608  | 0.026777 | 0.26272  | 0.8827   | -0.18001 |
| TAG543-FA202                 | 0.19288  | 0.83997 | 0.87684 | -0.18962 | 0.08823  | 0.98395 | 0.99448 | -0.00799 | 0.00126  | 0.034775 | 1.7297  | 0.79053  | 0.11167  | 0.80329 | 0.84111 | -0.24963 | 0.54875  | 0.74747  | 1.0323   | 0.045843 |
| TAG462-FA120                 | 0.54024  | 0.94319 | 0.88215 | -0.18091 | 0.10755  | 0.92112 | 0.71864 | -0.47666 | 0.044524 | 0.16895  | 0.52444 | -0.93116 | 0.97267  | 0.9957  | 1.0054  | 0.007736 | 0.15291  | 0.42754  | 1.1265   | 0.1719   |
| TAG543-FA202                 | 0.66652  | 0.99046 | 0.87071 | -0.19973 | 0.39955  | 0.92112 | 1.2341  | 0.30351  | 0.030059 | 0.13036  | 1.6792  | 0.74775  | 0.43332  | 0.87102 | 0.90293 | -0.14731 | 0.26915  | 0.52713  | 0.83399  | -0.26191 |
| DAG160/160                   | 0.056334 | 0.61472 | 0.8118  | -0.3008  | 0.30229  | 0.92112 | 1.3416  | 0.424    | 0.048471 | 0.17913  | 1.6633  | 0.73406  | 0.40221  | 0.87102 | 0.82584 | -0.27607 | 0.1941   | 0.47815  | 1.1122   | 0.15343  |
| TAG512-FA160                 | 0.28589  | 0.9254  | 0.89169 | -0.16538 | 0.26531  | 0.92112 | 1.116   | 0.15829  | 0.011239 | 0.078206 | 1.5557  | 0.63758  | 0.42138  | 0.87102 | 0.92175 | -0.11755 | 0.40174  | 0.63004  | 1.0638   | 0.089171 |
| TAG522-FA180                 | 0.98639  | 0.99794 | 0.9682  | -0.04662 | 0.45606  | 0.93084 | 0.62082 | -0.68776 | 0.64237  | 0.79991  | 1.0263  | 0.037505 | 0.1302   | 0.80329 | 0.48287 | -1.0503  | 0.039713 | 0.2813   | 0.37109  | -1.4302  |
| TAG542-FA182                 | 0.9909   | 0.99794 | 0.96936 | -0.04489 | 0.44992  | 0.93084 | 1.0999  | 0.13741  | 0.013832 | 0.0835   | 1.5927  | 0.67148  | 0.065674 | 0.80329 | 0.6924  | -0.53031 | 0.047159 | 0.29047  | 0.61745  | -0.6956  |
| TAG492-FA181                 | 0.71134  | 0.99234 | 0.97761 | -0.03267 | 0.95899  | 0.99206 | 0.99942 | -0.00083 | 0.001142 | 0.034775 | 0.49942 | -1.0017  | 0.65756  | 0.90034 | 1.0965  | 0.13291  | 0.24474  | 0.51246  | 0.92644  | -0.11023 |
| TAG503-FA161                 | 0.94711  | 0.99234 | 0.99552 | -0.00648 | 0.8394   | 0.97588 | 0.91657 | -0.12568 | 0.000909 | 0.034775 | 0.36779 | -1.443   | 0.30317  | 0.83668 | 0.62246 | -0.68394 | 0.045277 | 0.29047  | 0.72834  | -0.45733 |
| DAG161/182                   | 0.23416  | 0.89656 | 1.3298  | 0.41126  | 0.37333  | 0.92112 | 1.5964  | 0.67478  | 0.74574  | 0.85584  | 1.3344  | 0.41623  | 0.034131 | 0.80329 | 1.6543  | 0.72624  | 0.26655  | 0.52446  | 1.408    | 0.49367  |
| ADENOSINE PHOSPHOSULFATE_neg | 0.72995  | 0.99234 | 1.3229  | 0.40374  | 0.12605  | 0.92112 | 4.9164  | 2.2976   | 0.007579 | 0.063157 | 6.4435  | 2.6879   | 0.62387  | 0.90034 | 0.60079 | -0.73507 | 0.16095  | 0.43848  | 2.7473   | 1.458    |
| TAG500-FA160                 | 0.006264 | 0.42014 | 0.85646 | -0.22354 | 0.50208  | 0.96398 | 1.1425  | 0.19217  | 0.052499 | 0.18271  | 1.4733  | 0.55905  | 0.16937  | 0.80329 | 0.80124 | -0.31968 | 0.082273 | 0.34394  | 0.83614  | -0.25818 |
| CE150                        | 0.020825 | 0.42014 | 1.7641  | 0.81894  | 0.42001  | 0.92238 | 1.3292  | 0.41058  | 0.042946 | 0.16745  | 0.46112 | -1.1168  | 0.021735 | 0.80329 | 1.4875  | 0.57293  | 0.96212  | 0.98058  | 0.85907  | -0.21915 |
| TAG492-FA150                 | 0.69156  | 0.99234 | 0.97419 | -0.03772 | 0.42603  | 0.92378 | 0.79794 | -0.32564 | 0.004368 | 0.053283 | 0.53312 | -0.90746 | 0.91146  | 0.97744 | 0.94014 | -0.08906 | 0.002365 | 0.096167 | 0.66411  | -0.5905  |
| CER160                       | 0.2303   | 0.89656 | 1.1297  | 0.17589  | 0.05613  | 0.92112 | 0.49731 | -1.0078  | 0.041541 | 0.16646  | 2.6512  | 1.4066   | 0.056374 | 0.80329 | 0.56398 | -0.82629 | 0.074951 | 0.33329  | 0.27215  | -1.8775  |
| CER240                       | 0.60385  | 0.96479 | 0.5877  | -0.76685 | 0.39372  | 0.92112 | 0.37599 | -1.4112  | 0.75516  | 0.86023  | 2.6391  | 1.4001   | 0.1463   | 0.80329 | 0.40361 | -1.309   | 0.013154 | 0.16941  | 0.096508 | -3.3732  |
| 1-METHYLADENOSINE_pos_1      | 0.9601   | 0.99234 | 1.5179  | 0.60209  | 0.18938  | 0.92112 | 1.3869  | 0.4719   | 0.20248  | 0.42183  | 0.69368 | -0.52765 | 0.66785  | 0.90034 | 0.99142 | -0.01243 | 0.04316  | 0.29047  | 8.0461   | 3.0083   |
| TAG492-FA161                 | 0.93345  | 0.99234 | 1.0005  | 0.006655 | 0.80291  | 0.9749  | 1.0431  | 0.060841 | 0.029292 | 0.12834  | 0.42433 | -1.2367  | 0.21693  | 0.80329 | 1.2718  | 0.34689  | 0.58544  | 0.76619  | 1.0199   | 0.028387 |
| TAG482-FA182                 | 0.94531  | 0.99234 | 1.0074  | 0.010586 | 0.14565  | 0.92112 | 0.87472 | -0.1931  | 0.043422 | 0.16777  | 0.56226 | -0.83069 | 0.77581  | 0.95689 | 0.95868 | -0.06088 | 0.037203 | 0.27739  | 0.87369  | -0.1948  |
| TAG522-FA160                 | 0.83203  | 0.99234 | 0.98362 | -0.02382 | 0.14821  | 0.92112 | 0.61881 | -0.69243 | 0.81837  | 0.88346  | 0.35566 | -1.4914  | 0.25167  | 0.80329 | 0.67919 | -0.55811 | 0.038301 | 0.28065  | 0.44512  | -1.1677  |
| TAG483-FA140                 | 0.32402  | 0.9255  | 0.80508 | -0.3128  | 0.094476 | 0.92112 | 0.71022 | -0.49367 | 0.009343 | 0.067297 | 0.40363 | -1.3089  | 0.91144  | 0.97744 | 0.82932 | -0.26999 | 0.32832  | 0.57442  | 0.7106   | -0.49289 |
| TAG564-FA202                 | 0.5512   | 0.94319 | 0.85212 | -0.23087 | 0.46142  | 0.93084 | 1.2077  | 0.27227  | 0.008    |          |         |          |          |         |         |          |          |          |          |          |



Supplementary Table S3D. List of dysregulated metabolites for APCHi mice following exposure to 9.5 Gy of Gamma-radiation, 24 h, 1 week, 1 month, 3 month and 6 months post-irradiation.

| name                  | 9.5Gy / 0.0Gy |         |         |          | 9.5Gy / 0.0Gy |          |         |          | 9.5Gy / 0.0Gy |         |         |          | 9.5Gy / 0.0Gy |         |         |          | 9.5Gy / 0.0Gy |         |         |          |
|-----------------------|---------------|---------|---------|----------|---------------|----------|---------|----------|---------------|---------|---------|----------|---------------|---------|---------|----------|---------------|---------|---------|----------|
|                       | 24h           |         |         |          | 1wk           |          |         |          | 1mo           |         |         |          | 3mo           |         |         |          | 6mo           |         |         |          |
|                       | p-value       | FDR     | FC      | LOG2FC   | p-value       | FDR      | FC      | LOG2FC   | p-value       | FDR     | FC      | LOG2FC   | p-value       | FDR     | FC      | LOG2FC   | p-value       | FDR     | FC      | LOG2FC   |
| APCHI                 |               |         |         |          |               |          |         |          |               |         |         |          |               |         |         |          |               |         |         |          |
| CYSTEINE_neg_5        | 0.015143      | 0.52739 | 2.6491  | 1.4055   | 0.095072      | 0.32496  | 0.62103 | -0.68727 | 0.22497       | 0.43658 | 0.75296 | -0.40936 | 0.018044      | 0.31888 | 2.0079  | 1.0057   | 0.85023       | 0.97398 | 1.2538  | 0.32626  |
| CE204                 | 0.023941      | 0.55845 | 1.9966  | 0.99755  | 0.016303      | 0.14742  | 2.1295  | 1.0905   | 0.46448       | 0.65295 | 1.3579  | 0.44139  | 0.88722       | 0.9683  | 0.96502 | -0.05137 | 0.81997       | 0.95829 | 0.91003 | -0.13601 |
| OXOGLUTARATE_neg_2    | 0.006983      | 0.42218 | 0.13069 | -2.9357  | 0.12542       | 0.3727   | 0.37684 | -1.408   | 0.25439       | 0.46007 | 0.89789 | -0.15539 | 0.89145       | 0.9683  | 0.9642  | -0.05259 | 0.22693       | 0.7048  | 0.5624  | -0.83034 |
| CE182                 | 0.18226       | 0.76702 | 1.2236  | 0.29116  | 0.003508      | 0.053246 | 1.5209  | 0.60496  | 0.5657        | 0.72417 | 1.1416  | 0.19105  | 0.15997       | 0.42629 | 1.1683  | 0.2244   | 0.44662       | 0.8461  | 0.92695 | -0.10944 |
| NORMETANEPHRINE_pos_1 | 0.018711      | 0.55845 | 2.1597  | 1.1108   | 0.055209      | 0.24671  | 4.0264  | 2.0095   | 0.80817       | 0.88297 | 0.73842 | -0.43748 | 0.059336      | 0.33448 | 3.0632  | 1.6151   | 0.54975       | 0.86495 | 1.2774  | 0.35325  |
| ASCORBATE_neg_2       | 0.64308       | 0.96666 | 1.2149  | 0.28089  | 0.47417       | 0.74005  | 0.92789 | -0.10797 | 0.00514       | 0.16803 | 0.47959 | -1.0601  | 0.66684       | 0.8432  | 0.82183 | -0.28308 | 0.87338       | 0.98391 | 0.90664 | -0.1414  |
| AMINOADIPATE_pos_1    | 0.11708       | 0.7065  | 1.4523  | 0.53838  | 0.20931       | 0.47423  | 0.50501 | -0.9856  | 0.10837       | 0.34512 | 0.67133 | -0.5749  | 0.25156       | 0.49726 | 3.1215  | 1.6422   | 0.036019      | 0.56697 | 0.42531 | -1.2334  |
| CE226                 | 0.001499      | 0.21242 | 3.1033  | 1.6338   | 0.21978       | 0.48649  | 1.5767  | 0.65687  | 0.86081       | 0.91462 | 1.0852  | 0.11801  | 0.004002      | 0.28348 | 2.9239  | 1.5479   | 0.14288       | 0.70044 | 1.5083  | 0.59296  |
| TAG566-FA225          | 0.16656       | 0.73306 | 1.3648  | 0.4487   | 0.52519       | 0.76441  | 1.1634  | 0.21829  | 0.039781      | 0.26836 | 0.62067 | -0.6881  | 0.91138       | 0.97812 | 1.3373  | 0.41927  | 0.77536       | 0.94214 | 0.84067 | -0.25039 |
| TAG544-FA224          | 0.03792       | 0.55845 | 1.598   | 0.6763   | 0.66688       | 0.8694   | 1.4033  | 0.48879  | 0.043448      | 0.27978 | 0.57725 | -0.79274 | 0.17017       | 0.43582 | 1.5438  | 0.62649  | 0.5933        | 0.87674 | 1.1322  | 0.17918  |
| ACETYLPHOSPHATE_pos_1 | 0.46494       | 0.91799 | 0.90115 | -0.15017 | 0.039781      | 0.21415  | 0.60095 | -0.73468 | 0.089203      | 0.32588 | 0.91799 | -0.12346 | 0.89539       | 0.9683  | 1.0725  | 0.10091  | 0.18718       | 0.70044 | 0.73721 | -0.43985 |
| TAG522-FA202          | 0.063835      | 0.58978 | 1.5899  | 0.66893  | 0.9578        | 0.99043  | 1.2392  | 0.30943  | 0.068361      | 0.30582 | 0.57663 | -0.79428 | 0.026206      | 0.33448 | 1.8093  | 0.85544  | 0.60197       | 0.87674 | 0.95314 | -0.06924 |
| TAG565-FA181          | 0.74731       | 0.96748 | 2.0094  | 1.0068   | 0.053927      | 0.24671  | 0.49395 | -1.0176  | 0.097123      | 0.33288 | 0.45883 | -1.124   | 0.042853      | 0.33448 | 0.24502 | -2.029   | 0.077052      | 0.67237 | 0.32327 | -2.1061  |
| TAG483-FA181          | 0.048825      | 0.55845 | 0.78731 | -0.34499 | 0.58562       | 0.80546  | 1.073   | 0.10162  | 0.22199       | 0.43658 | 1.1765  | 0.23444  | 0.35957       | 0.62121 | 0.94746 | -0.07786 | 0.99249       | 0.99956 | 1.0016  | 0.002274 |
| TAG501-FA140          | 0.66174       | 0.96666 | 0.97039 | -0.04337 | 0.45992       | 0.73484  | 1.4393  | 0.5254   | 0.032673      | 0.25181 | 1.5252  | 0.60904  | 0.19022       | 0.44626 | 0.83562 | -0.25908 | 0.81635       | 0.95829 | 1.0004  | 0.000522 |
| ATROLACTIC ACID_neg_2 | 0.85966       | 0.99393 | 1.0023  | 0.003249 | 0.070973      | 0.27795  | 1.5417  | 0.62452  | 0.020336      | 0.22709 | 1.6913  | 0.75809  | 0.21097       | 0.46699 | 1.8881  | 0.91693  | 0.084279      | 0.6773  | 2.4522  | 1.2941   |
| TAG582-FA181          | 0.49982       | 0.92681 | 1.0997  | 0.13708  | 0.35905       | 0.62397  | 0.67686 | -0.56308 | 0.24659       | 0.62063 | 0.65551 | -0.60931 | 0.012692      | 0.31888 | 0.31193 | -1.6807  | 0.18527       | 0.70044 | 0.46286 | -1.1113  |
| TAG527-FA160          | 0.92005       | 0.99393 | 0.99907 | -0.00134 | 0.67556       | 0.87195  | 1.1168  | 0.15938  | 0.5048        | 0.45886 | 0.78301 | -0.3529  | 0.12886       | 0.4002  | 1.2448  | 0.31594  | 0.040443      | 0.57294 | 1.1284  | 0.17429  |
| TAG483-FA182          | 0.069829      | 0.59484 | 0.85193 | -0.2312  | 0.39148       | 0.66818  | 0.82584 | -0.27607 | 0.004866      | 0.16803 | 1.4046  | 0.49012  | 0.15065       | 0.42122 | 0.85005 | -0.23439 | 0.072993      | 0.67237 | 0.87519 | -0.19233 |
| TAG521-FA201          | 0.48599       | 0.91799 | 1.27    | 0.34484  | 0.29374       | 0.55697  | 0.90031 | -0.15151 | 0.023405      | 0.22824 | 0.64953 | -0.62254 | 0.67059       | 0.8432  | 1.1001  | 0.13762  | 0.63402       | 0.87674 | 0.83319 | -0.26327 |
| TAG568-FA205          | 0.89257       | 0.99393 | 0.76414 | -0.3881  | 0.96423       | 0.99053  | 1.2898  | 0.36716  | 0.59985       | 0.74436 | 0.65351 | -0.61373 | 0.017164      | 0.31888 | 0.61947 | -0.6909  | 0.72787       | 0.93556 | 0.89088 | -0.16669 |
| TAG521-FA161          | 0.052104      | 0.55845 | 1.3814  | 0.46612  | 0.46837       | 0.73973  | 0.95807 | -0.0618  | 0.021283      | 0.22709 | 0.64927 | -0.62311 | 0.11006       | 0.38027 | 1.3306  | 0.41207  | 0.98441       | 0.99956 | 1.2011  | 0.26431  |
| CE180                 | 0.64784       | 0.96666 | 1.1518  | 0.20385  | 8.5E-05       | 0.01386  | 1.8644  | 0.89872  | 0.92949       | 0.9496  | 0.99641 | -0.00519 | 0.32667       | 0.58581 | 1.1544  | 0.20719  | 0.45988       | 0.8461  | 1.1093  | 0.14959  |
| TAG511-FA170          | 0.043903      | 0.55845 | 1.3645  | 0.44841  | 0.47711       | 0.74005  | 0.91819 | -0.12314 | 0.061185      | 0.30521 | 0.83434 | -0.2613  | 0.49398       | 0.74904 | 1.0686  | 0.09578  | 0.68188       | 0.90737 | 1.0895  | 0.12371  |
| TAG442-FA182          | 0.006022      | 0.42218 | 0.65944 | -0.60069 | 0.055223      | 0.24671  | 1.6758  | 0.74484  | 0.015674      | 0.22433 | 1.6437  | 0.71693  | 0.63511       | 0.8432  | 1.0929  | 0.1281   | 0.578         | 0.87674 | 0.97364 | -0.03853 |
| ADP_pos_1             | 0.68318       | 0.96666 | 1.0208  | 0.029751 | 0.51959       | 0.75884  | 1.0665  | 0.092893 | 0.002066      | 0.16803 | 2.6607  | 1.4118   | 0.36636       | 0.62784 | 1.226   | 0.29394  | 0.57654       | 0.87674 | 1.233   | 0.30214  |
| TAG564-FA204          | 0.12303       | 0.7065  | 1.3205  | 0.40104  | 0.72393       | 0.87958  | 1.5727  | 0.65321  | 0.036086      | 0.25181 | 0.46537 | -1.1035  | 0.54693       | 0.79333 | 1.3426  | 0.42499  | 0.20489       | 0.70044 | 0.75052 | -0.41403 |
| CE181                 | 0.34179       | 0.90224 | 1.0917  | 0.12659  | 0.000234      | 0.019885 | 1.5125  | 0.59692  | 0.54387       | 0.70497 | 1.1882  | 0.24878  | 0.96263       | 0.98693 | 0.88535 | -0.17567 | 0.062988      | 0.63737 | 0.84627 | -0.24081 |
| FFA201                | 0.59026       | 0.96666 | 1.3905  | 0.47556  | 0.17506       | 0.4276   | 1.3717  | 0.45592  | 0.15546       | 0.38012 | 0.75513 | -0.4052  | 0.01379       | 0.31888 | 1.4531  | 0.53912  | 0.27117       | 0.75033 | 1.2715  | 0.34657  |
| TAG442-FA120          | 0.014653      | 0.52739 | 0.67664 | -0.56353 | 0.27235       | 0.53757  | 0.65592 | -0.60842 | 0.20217       | 0.4111  | 1.2276  | 0.29583  | 0.96723       | 0.98693 | 1.007   | 0.001045 | 0.6035        | 0.87674 | 0.93329 | -0.09961 |
| IMIDAZOLE_pos_1       | 0.69048       | 0.96666 | 1.0693  | 0.096619 | 0.35009       | 0.62218  | 1.2107  | 0.27583  | 0.038326      | 0.26272 | 1.6514  | 0.72365  | 0.66492       | 0.8432  | 1.2851  | 0.36186  | 0.57364       | 0.87674 | 0.95826 | -0.06151 |
| TAG460-FA140          | 0.89583       | 0.99393 | 1.0507  | 0.071412 | 0.3096        | 0.57388  | 1.0959  | 0.13215  | 0.11069       | 0.34512 | 1.1939  | 0.25566  | 0.44423       | 0.7078  | 1.031   | 0.044019 | 0.048083      | 0.59265 | 1.2577  | 0.3308   |
| FFA182                | 0.43784       | 0.90782 | 1.5     | 0.58496  | 0.37305       | 0.64189  | 1.1336  | 0.18094  | 0.40762       | 0.61605 | 0.85832 | -0.22042 | 0.005577      | 0.31888 | 1.4559  | 0.54187  | 0.21893       | 0.7048  | 1.3159  | 0.39602  |
| TAG421-FA160          | 0.24584       | 0.80776 | 0.87495 | -0.19273 | 0.00116       | 0.043099 | 2.0637  | 1.0453   | 0.053324      | 0.29916 | 1.6072  | 0.68453  | 0.86632       | 0.96795 | 0.95958 | -0.05953 | 0.52338       | 0.86495 | 1.1818  | 0.241    |
| TAG442-FA181          | 0.041969      | 0.55845 | 0.75285 | -0.40957 | 0.006836      | 0.085445 | 3.2279  | 1.219    | 0.016784      | 0.22709 | 1.8858  | 0.91516  | 0.73941       | 0.89321 | 1.0163  | 0.023349 | 0.097521      | 0.6849  | 1.3268  | 0.40792  |
| MEVALONOLACTONE_pos_2 | 0.            |         |         |          |               |          |         |          |               |         |         |          |               |         |         |          |               |         |         |          |



|                              |          |         |         |          |          |          |         |          |          |         |         |          |          |         |         |          |          |         |         |          |
|------------------------------|----------|---------|---------|----------|----------|----------|---------|----------|----------|---------|---------|----------|----------|---------|---------|----------|----------|---------|---------|----------|
| TAG587-FA182                 | 0.60977  | 0.96666 | 0.91622 | -0.12624 | 0.24115  | 0.50707  | 1.4079  | 0.49353  | 0.04271  | 0.27926 | 0.56344 | -0.82767 | 0.90187  | 0.97037 | 1.0497  | 0.069924 | 0.48892  | 0.8639  | 0.79779 | -0.32591 |
| DAG181/181                   | 0.65402  | 0.96666 | 0.89477 | -0.16041 | 0.032616 | 0.20385  | 1.323   | 0.40382  | 0.17729  | 0.40079 | 0.8842  | -0.17756 | 0.083347 | 0.34908 | 1.162   | 0.21658  | 0.46663  | 0.85115 | 1.0959  | 0.1321   |
| TAG482-FA161                 | 0.79012  | 0.98188 | 1.0731  | 0.10172  | 0.039764 | 0.21415  | 0.55516 | -0.84903 | 0.1115   | 0.34512 | 1.3522  | 0.4353   | 0.4585   | 0.72171 | 0.87779 | -0.18805 | 0.89173  | 0.9879  | 1.0189  | 0.02707  |
| TAG561-FA181                 | 0.38291  | 0.90782 | 1.1106  | 0.1514   | 0.03071  | 0.20385  | 1.2198  | 0.28664  | 0.018115 | 0.22709 | 0.81571 | -0.29387 | 0.20221  | 0.4573  | 1.1557  | 0.20875  | 0.44167  | 0.8461  | 0.94093 | -0.08784 |
| N-ACETYLLALANINE_neg_1       | 0.029921 | 0.55845 | 3.0959  | 1.6303   | 0.57708  | 0.79889  | 1.2351  | 0.30467  | 0.60195  | 0.74436 | 1.1367  | 0.18488  | 0.59278  | 0.83146 | 0.76396 | -0.38843 | 0.017134 | 0.5398  | 0.51894 | -0.94637 |
| DAG180/181                   | 0.4803   | 0.91799 | 1.0857  | 0.11868  | 0.040411 | 0.21415  | 1.4438  | 0.52987  | 0.15501  | 0.38012 | 0.85262 | -0.23003 | 0.018758 | 0.31888 | 1.2748  | 0.35032  | 0.80001  | 0.95275 | 0.9917  | -0.01202 |
| ALLANTOIN_neg_2              | 0.94162  | 0.99393 | 0.85824 | -0.22055 | 0.092768 | 0.32054  | 0.56045 | -0.83534 | 0.10065  | 0.3395  | 0.76558 | -0.38538 | 0.041824 | 0.33448 | 1.7998  | 0.84782  | 0.29657  | 0.77043 | 1.5442  | 0.62688  |
| INDOLEACRYLIC ACID_pos_1     | 0.12866  | 0.7065  | 0.70433 | -0.50568 | 0.8587   | 0.94691  | 1.2355  | 0.30509  | 0.035929 | 0.25181 | 3.9306  | 1.9748   | 0.10582  | 0.38027 | 1.0346  | 0.049027 | 0.97006  | 0.99778 | 1.2565  | 0.32943  |
| TAG481-FA180                 | 0.65255  | 0.96666 | 0.99002 | -0.01448 | 0.035074 | 0.20995  | 1.4039  | 0.48947  | 0.011844 | 0.21636 | 1.4907  | 0.57597  | 0.6055   | 0.83816 | 1.0494  | 0.069589 | 0.60086  | 0.87674 | 0.99641 | -0.00518 |
| TAG400-FA140                 | 0.71149  | 0.96748 | 0.96278 | -0.05472 | 0.23529  | 0.50707  | 1.1271  | 0.17268  | 0.56261  | 0.72238 | 1.1148  | 0.15682  | 0.046781 | 0.33448 | 1.3358  | 0.41775  | 0.002668 | 0.5398  | 1.4613  | 0.54729  |
| TAG543-FA183                 | 0.22484  | 0.80776 | 1.3103  | 0.38986  | 0.68979  | 0.87195  | 1.3833  | 0.46814  | 0.012534 | 0.21636 | 0.44998 | -1.1521  | 0.064068 | 0.33448 | 1.5541  | 0.63608  | 0.43588  | 0.8461  | 0.92926 | -0.10584 |
| TAG522-FA181                 | 0.60549  | 0.96666 | 1.1821  | 0.24136  | 0.19221  | 0.44776  | 1.3275  | 0.4087   | 0.88879  | 0.92801 | 0.86788 | -0.20443 | 0.03691  | 0.33448 | 0.5606  | -0.83496 | 0.2882   | 0.77043 | 0.69617 | -0.5225  |
| TAG541-FA180                 | 0.81588  | 0.99092 | 1.1708  | 0.22753  | 0.032139 | 0.20385  | 1.483   | 0.56855  | 0.73433  | 0.84122 | 0.86506 | -0.20913 | 0.21788  | 0.47269 | 0.63407 | -0.65729 | 0.10166  | 0.6849  | 0.58415 | -0.77558 |
| TAG484-FA182                 | 0.079818 | 0.61677 | 0.60361 | -0.72831 | 0.005253 | 0.067646 | 0.48575 | -1.0417  | 0.092528 | 0.32588 | 1.3754  | 0.45984  | 0.26997  | 0.52153 | 0.77114 | -0.37493 | 0.7322   | 0.93556 | 0.86977 | -0.2013  |
| XANTHURENIC ACID_pos_2       | 0.96005  | 0.99393 | 1.751   | 0.8082   | 0.61382  | 0.81779  | 0.59892 | -0.73957 | 0.71858  | 0.82539 | 0.87882 | -0.18636 | 0.001051 | 0.23372 | 0.46406 | -1.1076  | 0.84965  | 0.97398 | 0.97555 | -0.03572 |
| TAG541-FA200                 | 0.1234   | 0.7065  | 0.72718 | -0.45962 | 0.113    | 0.35839  | 0.71446 | -0.48507 | 0.50846  | 0.6904  | 0.78597 | -0.34745 | 0.002734 | 0.23372 | 0.5804  | -0.78487 | 0.5316   | 0.86495 | 1.1014  | 0.13938  |
| TAG400-FA120                 | 0.6758   | 0.96666 | 0.93938 | -0.09023 | 0.83813  | 0.93332  | 0.96338 | -0.05382 | 0.98905  | 0.99138 | 1.0332  | 0.04705  | 0.054078 | 0.33448 | 1.3858  | 0.4707   | 0.008467 | 0.5398  | 1.4414  | 0.52743  |
| TAG480-FA180                 | 0.99649  | 0.99651 | 1.0085  | 0.012189 | 0.002732 | 0.04683  | 1.43    | 0.51601  | 0.41585  | 0.61605 | 1.0966  | 0.13305  | 0.55052  | 0.79572 | 1.0448  | 0.063161 | 0.14402  | 0.70044 | 1.2766  | 0.35226  |
| METHIONINE_pos_1             | 0.54779  | 0.96666 | 1.1023  | 0.14053  | 0.5116   | 0.7547   | 0.79041 | -0.33933 | 0.013728 | 0.21636 | 0.53885 | -0.89205 | 0.89093  | 0.9683  | 1.037   | 0.052479 | 0.61525  | 0.87674 | 1.5766  | 0.65681  |
| TAG492-FA182                 | 0.23614  | 0.80776 | 0.90279 | -0.14753 | 0.27836  | 0.54518  | 0.76781 | -0.38117 | 0.2084   | 0.41976 | 1.3093  | 0.38884  | 0.10784  | 0.38027 | 0.78407 | -0.35094 | 0.020146 | 0.5398  | 0.74807 | -0.41875 |
| TAG483-FA160                 | 0.76473  | 0.96748 | 0.86908 | -0.20243 | 0.83429  | 0.93309  | 0.98418 | -0.02301 | 0.18024  | 0.40419 | 1.2433  | 0.31421  | 0.007337 | 0.31888 | 0.61718 | -0.69623 | 0.34288  | 0.81411 | 0.79482 | -0.3313  |
| SM241                        | 0.67809  | 0.96666 | 0.87519 | -0.19234 | 0.012612 | 0.12705  | 1.7614  | 0.81673  | 0.15956  | 0.38313 | 0.78312 | -0.35269 | 0.24481  | 0.48848 | 1.437   | 0.52303  | 0.75518  | 0.93556 | 1.2275  | 0.29578  |
| TAG565-FA202                 | 0.051831 | 0.55845 | 5.4308  | 2.4412   | 0.00239  | 0.046168 | 1.7305  | 0.79117  | 0.84464  | 0.91191 | 1.0565  | 0.07935  | 0.23447  | 0.48293 | 1.1753  | 0.23303  | 0.17723  | 0.70044 | 2.9988  | 1.5844   |
| TAG493-FA161                 | 0.4144   | 0.90782 | 0.95093 | -0.07259 | 0.002536 | 0.04683  | 0.5308  | -0.91377 | 0.18326  | 0.40419 | 1.2224  | 0.28975  | 0.39342  | 0.65494 | 0.89028 | -0.16766 | 0.21069  | 0.70044 | 0.91445 | -0.12902 |
| TAG546-FA181                 | 0.41697  | 0.90782 | 0.35308 | -1.5019  | 0.63799  | 0.83979  | 1.4258  | 0.51174  | 0.004011 | 0.16803 | 0.56923 | -0.81291 | 0.31731  | 0.5835  | 0.85778 | -0.22132 | 0.44963  | 0.8461  | 1.1422  | 0.19182  |
| TAG481-FA160                 | 0.37544  | 0.90782 | 1.1117  | 0.15282  | 0.60727  | 0.81161  | 0.88173 | -0.18158 | 0.004074 | 0.16803 | 1.3949  | 0.48019  | 0.025524 | 0.33448 | 0.8088  | -0.30614 | 0.7349   | 0.93556 | 0.99392 | -0.0088  |
| TAG563-FA181                 | 0.57616  | 0.96666 | 1.1137  | 0.15541  | 0.032078 | 0.20385  | 1.2897  | 0.36707  | 0.031448 | 0.25181 | 0.82739 | -0.27336 | 0.27249  | 0.52403 | 1.1879  | 0.24844  | 0.96797  | 0.99778 | 1.0654  | 0.091385 |
| TAG462-FA120                 | 0.050411 | 0.55845 | 0.64069 | -0.6423  | 0.70987  | 0.87195  | 1.0874  | 0.12086  | 0.003902 | 0.16803 | 1.6897  | 0.75674  | 0.045428 | 0.33448 | 0.79104 | -0.33818 | 0.33698  | 0.80913 | 0.94778 | -0.07737 |
| TAG543-FA202                 | 0.036055 | 0.55845 | 5.2573  | 2.3943   | 0.001806 | 0.046168 | 1.8086  | 0.85491  | 0.9825   | 0.98715 | 1.0366  | 0.051803 | 0.15765  | 0.42629 | 1.1781  | 0.23644  | 0.17991  | 0.70044 | 2.6229  | 1.3911   |
| TAG512-FA160                 | 0.65783  | 0.96666 | 1.1044  | 0.1432   | 0.069881 | 0.27795  | 1.2744  | 0.34985  | 0.17562  | 0.40079 | 0.83936 | -0.25264 | 0.039845 | 0.33448 | 1.2658  | 0.34     | 0.53945  | 0.86495 | 1.1157  | 0.15794  |
| 2-KETOHEXANOIC ACID_pos_2    | 0.88738  | 0.99393 | 1.056   | 0.078571 | 0.21135  | 0.47423  | 1.2906  | 0.36801  | 0.032661 | 0.25181 | 1.9187  | 0.94012  | 0.049372 | 0.33448 | 2.2674  | 1.181    | 0.87741  | 0.98391 | 1.0603  | 0.084462 |
| TAG542-FA182                 | 0.76925  | 0.96748 | 1.0061  | 0.008761 | 0.23082  | 0.50307  | 1.3144  | 0.39445  | 0.032305 | 0.25181 | 0.68038 | -0.55559 | 0.84374  | 0.95624 | 0.91381 | -0.13003 | 0.064872 | 0.63737 | 0.66204 | -0.95951 |
| TAG492-FA181                 | 0.55282  | 0.96666 | 0.97321 | -0.03917 | 0.045241 | 0.2262   | 0.66203 | -0.59504 | 0.125    | 0.36388 | 1.223   | 0.29048  | 0.54609  | 0.79333 | 0.92882 | -0.10653 | 0.092903 | 0.68076 | 0.88755 | -0.1721  |
| TAG561-FA160                 | 0.30546  | 0.87614 | 0.9618  | -0.0562  | 0.002292 | 0.046168 | 0.47805 | -1.0648  | 0.83877  | 0.91191 | 0.93791 | -0.09248 | 0.002655 | 0.23372 | 0.42007 | -1.2513  | 0.82253  | 0.95829 | 0.75995 | -0.39603 |
| TAG503-FA161                 | 0.27273  | 0.8586  | 1.2067  | 0.2711   | 0.000783 | 0.046168 | 0.53133 | -0.91232 | 0.93282  | 0.95071 | 1.017   | 0.024265 | 0.1009   | 0.38027 | 0.5817  | -0.78166 | 0.025691 | 0.54228 | 0.62725 | -0.67288 |
| TAG421-FA180                 | 0.84675  | 0.99393 | 0.95753 | -0.06261 | 0.1439   | 0.40251  | 0.69267 | -0.52977 | 0.59544  | 0.74436 | 1.1013  | 0.1392   | 0.11403  | 0.38463 | 1.3455  | 0.42809  | 0.023553 | 0.5398  | 1.4213  | 0.50722  |
| TAG543-FA181                 | 0.61357  | 0.96666 | 0.95084 | -0.07272 | 0.97831  | 0.99053  | 1.0936  | 0.12903  | 0.41668  | 0.61605 | 0.76737 | -0.38201 | 0.014476 | 0.31888 | 0.56105 | -0.83379 | 0.7706   | 0.94111 | 1.0472  | 0.066567 |
| TAG525-FA160                 | 0.48477  | 0.91799 | 0.3788  | -1.4005  | 0.51497  | 0.7547   | 1.6119  | 0.68875  | 0.048637 | 0.29114 | 0.63654 | -0.65167 | 0.35941  | 0.62121 | 0.80356 | -0.31551 | 0.21182  | 0.70044 | 1.2669  | 0.34127  |
| TAG420-FA120                 | 0.71986  | 0.96748 | 0.97246 | -0.0403  | 0.71974  | 0.879    | 0.98665 | -0.01939 | 0.63903  | 0.77714 | 1.0813  | 0.11279  | 0.10379  | 0.38027 | 1.2377  | 0.30766  | 0.004973 | 0.5398  | 1.4351  | 0.52112  |
| ADENOSINE PHOSPHOSULFATE_neg | 0.92538  | 0.99393 | 1.0525  | 0.073775 | 0.00519  | 0.067646 | 6.3293  | 2.6621   | 0.19913  | 0.41083 | 2.228   | 1.1558   | 0.30003  | 0.56556 | 1.8532  | 0.88998  | 0.49391  | 0.8639  | 0.88016 | -0.31983 |
| DAG140/182                   | 0.99651  | 0.99651 | 1.049   | 0.069    | 0.097416 | 0.32496  | 1.8273  | 0.8697   | 0.006184 | 0.18773 | 1.7549  | 0.81143  | 0.47692  | 0.7347  | 1.1715  | 0.22838  | 0.76773  | 0.94031 | 0.88907 | -0.16963 |
| TAG460-FA120                 | 0.20397  | 0.79448 | 0.88575 | -0.17503 | 0.020459 | 0.16102  | 1.3724  | 0.45668  | 0.22382  | 0.43658 | 1.2108  | 0.27593  | 0.87242  | 0.96795 | 1.0383  | 0.054204 | 0.10636  | 0.6849  | 1.1923  | 0.25379  |
| TAG492-FA150                 | 0.84123  | 0.99393 | 1.0734  | 0.10213  | 0.085824 | 0.30525  | 0.63512 | -0.65491 | 0.4125   | 0.61605 | 1.0453  | 0.063927 | 0.12477  | 0.4002  | 0.76185 | -0.39241 | 0.029262 | 0.54228 | 0.74473 | -0.4252  |
| CER160                       | 0.12397  | 0.7065  | 1.7762  | 0.8288   | 0.13411  | 0.38512  | 0.51156 | -0.96703 | 0.081001 | 0.32588 | 0.78314 | -0.35265 | 0.22509  | 0.48072 | 0.42419 | -1.2372  | 0.090963 | 0.5398  | 0.33228 | -1.5895  |
| CER240                       | 0.97426  | 0.99393 | 1.4913  | 0.57661  | 0.019412 | 0.15598  | 0.35863 | -1.4794  | 0.39326  | 0.60467 | 0.68705 | -0.54152 | 0.20249  | 0.4573  | 0.28811 | -1.7953  | 0.051511 | 0.59265 | 0.12757 | -2.9707  |
| PIPECOLATE_pos_3             | 0.37087  | 0.90782 | 2.9798  | 1.5752   | 0.30264  | 0.56662  | 0.76144 | -0.3932  | 0.002154 | 0.16803 | 0.49982 | -1.0005  | 0.46858  | 0.72681 | 0.83771 | -0.25547 | 0.87562  | 0.98391 | 0.82043 | -0.28554 |
| TAG421-FA161                 | 0.050371 | 0.55845 | 0.80578 | -0.31154 | 0.63296  | 0.83803  | 0.75664 | -0.40232 | 0.023821 | 0.22824 | 1.4597  | 0.54564  | 0.87457  | 0.96795 | 1.0379  | 0.053713 | 0.3      | 0.77043 | 1.0876  | 0.12109  |
| TAG492-FA161                 | 0.90172  | 0.99393 | 1.0348  | 0.049325 | 0.024083 | 0.17647  | 0.53747 | -0.89573 | 0.34701  | 0.55652 | 1.2229  | 0.29033  | 0.82213  | 0.9418  | 0.94539 | -0.08102 | 0.42662  | 0.8461  | 0.95209 | -0.07083 |
| TAG482-FA182                 | 0.19414  | 0.77762 | 0.91219 | -0.13259 | 0.63824  | 0.83979  | 1.0231  | 0.032896 | 0.01109  | 0.21636 | 1.4853  | 0.5      |          |         |         |          |          |         |         |          |



Supplementary Table S4. List of metabolites showing co-relation with heart dysfunction following 9.5 Gy of Gamma-radiation at 1 week and 1 month post-irradiation.

| Name                           | 1 Week     |          |             |           | 1 Month    |         |             |          |
|--------------------------------|------------|----------|-------------|-----------|------------|---------|-------------|----------|
|                                | p-value    | FDR      | Fold Change | Log2(FC)  | p-value    | FDR     | Fold Change | Log2(FC) |
| TAG544-FA160                   | 0.014408   | 0.31041  | 1.4308 ↑    | 0.51678   | 0.00076955 | 0.32706 | 2.0944 ↑    | 1.0665   |
| TAG524-FA204                   | 0.20853    | 0.60702  | 1.2322 ↑    | 0.30129   | 0.0020708  | 0.44004 | 1.7497 ↑    | 0.80709  |
| SPERMIDINE_pos_4               | 0.15569    | 0.56567  | 0.72461 ↓   | -0.46473  | 0.0070866  | 0.51123 | 0.66972 ↓   | -0.57837 |
| FFA161                         | 0.00031319 | 0.066554 | 0.49327 ↓   | -1.0195   | 0.0081376  | 0.51123 | 0.64731 ↓   | -0.62748 |
| CE226                          | 0.029381   | 0.31041  | 1.4628 ↑    | 0.54874   | 0.0092877  | 0.51123 | 2.9805 ↑    | 1.5755   |
| INDOLE-3-CARBOXYLIC ACID_neg_1 | 0.11573    | 0.53256  | 0.63227 ↓   | -0.66139  | 0.014323   | 0.51123 | 1.5816 ↑    | 0.66141  |
| TAG522-FA161                   | 0.057556   | 0.43372  | 0.79515 ↓   | -0.3307   | 0.01441    | 0.51123 | 1.5213 ↑    | 0.60533  |
| TAG545-FA160                   | 0.020139   | 0.31041  | 1.9306 ↑    | 0.94906   | 0.016435   | 0.51123 | 2.2189 ↑    | 1.1499   |
| TAG543-FA160                   | 0.065619   | 0.44981  | 1.4114 ↑    | 0.49708   | 0.019341   | 0.51123 | 1.8954 ↑    | 0.92251  |
| TAG472-FA181                   | 0.86526    | 0.97815  | 1.004 ↑     | 0.0058141 | 0.022537   | 0.51123 | 0.80089 ↓   | -0.32033 |
| TAG564-FA204                   | 0.81591    | 0.95527  | 1.117 ↑     | 0.15963   | 0.024565   | 0.51123 | 1.487 ↑     | 0.57239  |
| SM160                          | 0.060555   | 0.4362   | 1.2766 ↑    | 0.35233   | 0.024722   | 0.51123 | 1.4404 ↑    | 0.52643  |
| TAG542-FA182                   | 0.69838    | 0.91456  | 1.1352 ↑    | 0.18288   | 0.025882   | 0.51123 | 1.434 ↑     | 0.52007  |
| CER220                         | 0.9792     | 0.98616  | 1.1138 ↑    | 0.15553   | 0.028253   | 0.51123 | 2.1789 ↑    | 1.1236   |
| TAG523-FA203                   | 0.98783    | 0.99072  | 0.97949 ↓   | -0.029896 | 0.029307   | 0.51123 | 1.4785 ↑    | 0.56412  |
| TAG471-FA181                   | 0.6076     | 0.88738  | 0.96988 ↓   | -0.044125 | 0.030319   | 0.51123 | 0.83447 ↓   | -0.26107 |
| TAG451-FA181                   | 0.60343    | 0.88434  | 0.98783 ↓   | -0.017671 | 0.030518   | 0.51123 | 0.82418 ↓   | -0.27896 |
| TAG523-FA161                   | 0.49301    | 0.83477  | 1.0035 ↑    | 0.0050856 | 0.03167    | 0.51123 | 1.8816 ↑    | 0.91196  |
| TAG521-FA160                   | 0.12591    | 0.54053  | 1.3115 ↑    | 0.39118   | 0.033322   | 0.51123 | 1.8712 ↑    | 0.90398  |
| ANTHRANILIC ACID_pos_4         | 0.010778   | 0.30971  | 1.7307 ↑    | 0.79138   | 0.035273   | 0.51123 | 0.65952 ↓   | -0.60052 |
| TAG543-FA161                   | 0.055942   | 0.43372  | 0.58385 ↓   | -0.77634  | 0.035527   | 0.51123 | 1.465 ↑     | 0.55091  |
| TAG534-FA160                   | 0.86096    | 0.97815  | 0.93521 ↓   | -0.096642 | 0.036364   | 0.51123 | 1.4131 ↑    | 0.49882  |
| HOMOCYSTEINE_pos_2             | 0.00083077 | 0.080514 | 0.37503 ↓   | -1.4149   | 0.040291   | 0.51123 | 0.58392 ↓   | -0.77615 |
| TAG470-FA170                   | 0.11026    | 0.53251  | 0.87683 ↓   | -0.18963  | 0.040591   | 0.51123 | 0.80787 ↓   | -0.3078  |
| TAG541-FA160                   | 0.19849    | 0.60053  | 0.88692 ↓   | -0.17312  | 0.041645   | 0.51123 | 1.4168 ↑    | 0.50268  |
| TAG500-FA140                   | 0.068285   | 0.46065  | 0.8511 ↓    | -0.2326   | 0.042557   | 0.51123 | 0.82893 ↓   | -0.27068 |
| TAG567-FA204                   | 0.0011399  | 0.080743 | 1.8834 ↑    | 0.91331   | 0.043629   | 0.51123 | 1.7223 ↑    | 0.78432  |
| TAG542-FA180                   | 0.044691   | 0.39704  | 1.5887 ↑    | 0.66781   | 0.047086   | 0.51123 | 1.9379 ↑    | 0.95449  |
| TAG531-FA181                   | 0.039109   | 0.38654  | 1.2567 ↑    | 0.32966   | 0.048942   | 0.51123 | 1.2781 ↑    | 0.35398  |
| TAG542-FA181                   | 0.085124   | 0.4961   | 1.4516 ↑    | 0.53769   | 0.051191   | 0.51123 | 1.8945 ↑    | 0.92181  |
| TAG470-FA140                   | 0.089932   | 0.49873  | 0.87058 ↓   | -0.19995  | 0.051599   | 0.51123 | 0.82618 ↓   | -0.27547 |
| TAG525-FA161                   | 0.42824    | 0.79826  | 1.6649 ↑    | 0.73547   | 0.051938   | 0.51123 | 2.7036 ↑    | 1.4349   |
| TAG541-FA180                   | 0.022596   | 0.31041  | 1.5353 ↑    | 0.61852   | 0.053086   | 0.51123 | 1.8916 ↑    | 0.91963  |
| TAG470-FA150                   | 0.09722    | 0.50224  | 0.88393 ↓   | -0.178    | 0.053475   | 0.51123 | 0.84262 ↓   | -0.24705 |
| ADENOSINE PHOSPHOSULFATE_neg_2 | 0.61355    | 0.88757  | 0.96239 ↓   | -0.055305 | 0.053781   | 0.51123 | 2.0219 ↑    | 1.0157   |

|               |          |         |         |   |             |          |         |         |   |          |
|---------------|----------|---------|---------|---|-------------|----------|---------|---------|---|----------|
| CE204         | 0.69009  | 0.91456 | 0.98164 | ↓ | -0.02674    | 0.054074 | 0.51123 | 4.1714  | ↑ | 2.0605   |
| TAG484-FA182  | 0.3529   | 0.74991 | 1.1412  | ↑ | 0.19051     | 0.05449  | 0.51123 | 0.75427 | ↓ | -0.40684 |
| TAG522-FA160  | 0.17355  | 0.57755 | 1.3789  | ↑ | 0.46356     | 0.055193 | 0.51123 | 2.3272  | ↑ | 1.2186   |
| LACTATE_neg_1 | 0.3251   | 0.73885 | 1.6736  | ↑ | 0.74292     | 0.055442 | 0.51123 | 2.0289  | ↑ | 1.0207   |
| TAG524-FA161  | 0.26284  | 0.66099 | 1.5904  | ↑ | 0.6694      | 0.056067 | 0.51123 | 2.5691  | ↑ | 1.3613   |
| TAG451-FA160  | 0.37556  | 0.76877 | 0.94654 | ↓ | -0.079266   | 0.057856 | 0.51123 | 0.83964 | ↓ | -0.25216 |
| DAG120/181    | 0.42584  | 0.79727 | 0.91712 | ↓ | -0.12482    | 0.058383 | 0.51123 | 0.80524 | ↓ | -0.31252 |
| CER240        | 0.20598  | 0.60554 | 2.5189  | ↑ | 1.3328      | 0.058433 | 0.51123 | 4.1368  | ↑ | 2.0485   |
| TAG502-FA180  | 0.33183  | 0.7434  | 1.1038  | ↑ | 0.14252     | 0.062135 | 0.51123 | 1.3508  | ↑ | 0.43379  |
| TAG440-FA140  | 0.22649  | 0.62122 | 0.90369 | ↓ | -0.14611    | 0.067994 | 0.51123 | 0.85128 | ↓ | -0.23229 |
| DAG160/181    | 0.63003  | 0.90045 | 0.98116 | ↓ | -0.027444   | 0.068448 | 0.51123 | 0.8351  | ↓ | -0.25997 |
| TAG522-FA181  | 0.12582  | 0.54053 | 1.325   | ↑ | 0.40599     | 0.071266 | 0.51123 | 2.2336  | ↑ | 1.1594   |
| TAG522-FA180  | 0.094649 | 0.49873 | 1.6707  | ↑ | 0.74046     | 0.071638 | 0.51123 | 2.1273  | ↑ | 1.089    |
| TAG564-FA181  | 0.095052 | 0.49873 | 1.546   | ↑ | 0.6285      | 0.072057 | 0.51123 | 1.8379  | ↑ | 0.87803  |
| TAG562-FA201  | 0.0346   | 0.35012 | 1.3665  | ↑ | 0.45051     | 0.073396 | 0.51123 | 1.4399  | ↑ | 0.526    |
| TAG565-FA181  | 0.026159 | 0.31041 | 2.5025  | ↑ | 1.3234      | 0.074315 | 0.51123 | 2.5195  | ↑ | 1.3331   |
| TAG542-FA160  | 0.9715   | 0.98616 | 1.0646  | ↑ | 0.090286    | 0.075511 | 0.51123 | 1.6527  | ↑ | 0.72483  |
| TAG501-FA160  | 0.099267 | 0.50224 | 1.2361  | ↑ | 0.30577     | 0.076784 | 0.51123 | 1.7452  | ↑ | 0.8034   |
| TAG502-FA182  | 0.46225  | 0.8244  | 1.208   | ↑ | 0.27256     | 0.076884 | 0.51123 | 1.6327  | ↑ | 0.70722  |
| TAG462-FA182  | 0.89257  | 0.97842 | 0.99989 | ↓ | -0.00015971 | 0.078626 | 0.51123 | 0.85709 | ↓ | -0.22249 |
| TAG503-FA140  | 0.11654  | 0.53256 | 1.2794  | ↑ | 0.3555      | 0.078777 | 0.51123 | 1.8994  | ↑ | 0.92558  |
| DAG160/161    | 0.056302 | 0.43372 | 0.81457 | ↓ | -0.29588    | 0.078895 | 0.51123 | 0.81287 | ↓ | -0.2989  |
| TAG450-FA140  | 0.12427  | 0.54053 | 0.87457 | ↓ | -0.19335    | 0.079531 | 0.51123 | 0.8363  | ↓ | -0.2579  |
| TAG543-FA181  | 0.40341  | 0.77932 | 1.2773  | ↑ | 0.35305     | 0.080118 | 0.51123 | 1.6481  | ↑ | 0.72084  |
| TAG561-FA160  | 0.56273  | 0.86967 | 1.1499  | ↑ | 0.20149     | 0.080686 | 0.51123 | 1.7216  | ↑ | 0.78378  |
| TAG440-FA160  | 0.55261  | 0.86029 | 0.95767 | ↓ | -0.062399   | 0.081305 | 0.51123 | 0.85617 | ↓ | -0.22404 |
| TAG420-FA120  | 0.16756  | 0.57186 | 0.86518 | ↓ | -0.20893    | 0.081621 | 0.51123 | 0.81991 | ↓ | -0.28646 |
| FFA160        | 0.57724  | 0.86994 | 0.96068 | ↓ | -0.057867   | 0.086666 | 0.51123 | 0.77382 | ↓ | -0.36994 |
| TAG463-FA141  | 0.013651 | 0.31041 | 0.7454  | ↓ | -0.42391    | 0.0876   | 0.51123 | 0.80883 | ↓ | -0.30609 |
| TAG460-FA160  | 0.32343  | 0.73885 | 0.93515 | ↓ | -0.096726   | 0.088169 | 0.51123 | 0.89055 | ↓ | -0.16723 |
| TAG563-FA201  | 0.32289  | 0.73885 | 1.2545  | ↑ | 0.32714     | 0.088652 | 0.51123 | 1.5019  | ↑ | 0.58674  |
| TAG567-FA180  | 0.34018  | 0.74524 | 1.0534  | ↑ | 0.075029    | 0.089157 | 0.51123 | 0.80431 | ↓ | -0.31417 |
| TAG470-FA160  | 0.17661  | 0.57755 | 0.89778 | ↓ | -0.15557    | 0.089338 | 0.51123 | 0.858   | ↓ | -0.22094 |
| TAG510-FA160  | 0.47973  | 0.82568 | 1.0556  | ↑ | 0.078045    | 0.089645 | 0.51123 | 0.85264 | ↓ | -0.22999 |
| TAG471-FA170  | 0.35119  | 0.74991 | 0.90002 | ↓ | -0.15197    | 0.093143 | 0.51123 | 0.75764 | ↓ | -0.40042 |
| TAG523-FA160  | 0.64541  | 0.90045 | 1.516   | ↑ | 0.60026     | 0.093387 | 0.51123 | 2.3168  | ↑ | 1.2122   |
| TAG527-FA160  | 0.53424  | 0.84948 | 1.0537  | ↑ | 0.0754      | 0.093721 | 0.51123 | 0.8449  | ↓ | -0.24314 |
| TAG543-FA180  | 0.25778  | 0.65998 | 1.5472  | ↑ | 0.62965     | 0.094652 | 0.51123 | 1.7762  | ↑ | 0.8288   |
| TAG512-FA150  | 0.058169 | 0.43372 | 1.3139  | ↑ | 0.3939      | 0.095051 | 0.51123 | 1.6226  | ↑ | 0.69833  |



|                         |            |          |         |   |           |          |         |         |   |          |
|-------------------------|------------|----------|---------|---|-----------|----------|---------|---------|---|----------|
| TAG440-FA120            | 0.51162    | 0.84511  | 0.93894 | ↓ | -0.090897 | 0.096095 | 0.51123 | 0.86704 | ↓ | -0.20584 |
| TAG460-FA140            | 0.40778    | 0.78183  | 0.94462 | ↓ | -0.082199 | 0.097406 | 0.51123 | 0.89054 | ↓ | -0.16725 |
| TAG523-FA181            | 0.43564    | 0.8085   | 1.4977  | ↑ | 0.58272   | 0.097649 | 0.51123 | 2.3174  | ↑ | 1.2125   |
| OROTATE_neg_1           | 0.029517   | 0.31041  | 0.56329 | ↓ | -0.82805  | 0.098946 | 0.51123 | 0.82506 | ↓ | -0.27743 |
| TAG502-FA160            | 0.46864    | 0.82568  | 1.3603  | ↑ | 0.44395   | 0.099306 | 0.51123 | 2.0249  | ↑ | 1.0179   |
| METHIONINE_pos_1        | 0.19551    | 0.5978   | 0.67596 | ↓ | -0.56499  | 0.09947  | 0.51123 | 0.87338 | ↓ | -0.19532 |
| TAG521-FA180            | 0.044416   | 0.39704  | 1.4338  | ↑ | 0.51981   | 0.099477 | 0.51123 | 1.7988  | ↑ | 0.84704  |
| TAG441-FA161            | 0.38078    | 0.76877  | 0.92376 | ↓ | -0.11441  | 0.099762 | 0.51123 | 0.77616 | ↓ | -0.36558 |
| TAG530-FA160            | 0.58236    | 0.86994  | 1.0153  | ↑ | 0.021952  | 0.099865 | 0.51123 | 0.81759 | ↓ | -0.29055 |
| TAG462-FA141            | 0.16192    | 0.56567  | 0.87627 | ↓ | -0.19056  | 0.10104  | 0.51123 | 0.83889 | ↓ | -0.25345 |
| TAG543-FA182            | 0.27194    | 0.66919  | 1.7477  | ↑ | 0.80546   | 0.10855  | 0.54277 | 2.1749  | ↑ | 1.121    |
| 1-METHYLADENOSINE_pos_1 | 0.95405    | 0.98616  | 1.0038  | ↑ | 0.0054521 | 0.11051  | 0.54488 | 0.88409 | ↓ | -0.17773 |
| TAG450-FA160            | 0.07772    | 0.48415  | 0.86181 | ↓ | -0.21456  | 0.11334  | 0.54488 | 0.87202 | ↓ | -0.19756 |
| TAG523-FA182            | 0.58597    | 0.86994  | 1.5435  | ↑ | 0.62623   | 0.11461  | 0.54488 | 2.3677  | ↑ | 1.2435   |
| TAG400-FA120            | 0.15124    | 0.56567  | 0.84478 | ↓ | -0.24335  | 0.11567  | 0.54488 | 0.80705 | ↓ | -0.30928 |
| TAG544-FA181            | 0.84208    | 0.97251  | 1.456   | ↑ | 0.542     | 0.11574  | 0.54488 | 1.6461  | ↑ | 0.71905  |
| TAG564-FA201            | 0.025278   | 0.31041  | 1.836   | ↑ | 0.87659   | 0.11729  | 0.54488 | 1.7229  | ↑ | 0.78486  |
| TAG483-FA161            | 0.44006    | 0.81316  | 0.89191 | ↓ | -0.16502  | 0.11822  | 0.54488 | 0.81467 | ↓ | -0.29571 |
| TAG491-FA140            | 0.23934    | 0.63872  | 0.90596 | ↓ | -0.14249  | 0.12557  | 0.54488 | 0.83057 | ↓ | -0.26782 |
| TAG490-FA170            | 0.14341    | 0.56567  | 0.90125 | ↓ | -0.15     | 0.12574  | 0.54488 | 0.88723 | ↓ | -0.17261 |
| TAG566-FA160            | 0.029945   | 0.31041  | 1.1645  | ↑ | 0.2197    | 0.12709  | 0.54488 | 1.1784  | ↑ | 0.23682  |
| TAG546-FA160            | 0.15633    | 0.56567  | 1.4375  | ↑ | 0.52353   | 0.12894  | 0.54488 | 1.3931  | ↑ | 0.47829  |
| TAG523-FA180            | 0.00094722 | 0.080514 | 2.0347  | ↑ | 1.0248    | 0.13073  | 0.54488 | 1.9901  | ↑ | 0.99281  |
| DAG181/181              | 0.46007    | 0.8244   | 0.95417 | ↓ | -0.067689 | 0.13165  | 0.54488 | 0.8853  | ↓ | -0.17576 |
| TAG482-FA182            | 0.14289    | 0.56567  | 1.086   | ↑ | 0.11902   | 0.13295  | 0.54488 | 1.2154  | ↑ | 0.28149  |
| TAG514-FA182            | 0.092202   | 0.49873  | 1.2687  | ↑ | 0.34336   | 0.13317  | 0.54488 | 1.4481  | ↑ | 0.53416  |
| TAG512-FA170            | 0.97757    | 0.98616  | 1.0307  | ↑ | 0.043598  | 0.13545  | 0.54488 | 1.2838  | ↑ | 0.36043  |
| TAG583-FA181            | 0.17901    | 0.57997  | 1.3521  | ↑ | 0.43522   | 0.13651  | 0.54488 | 1.7753  | ↑ | 0.82806  |
| CE181                   | 0.21546    | 0.60821  | 1.1016  | ↑ | 0.13958   | 0.1371   | 0.54488 | 3.1239  | ↑ | 1.6433   |
| TAG420-FA140            | 0.2368     | 0.63696  | 0.89829 | ↓ | -0.15474  | 0.1372   | 0.54488 | 0.86447 | ↓ | -0.21011 |
| TAG441-FA140            | 0.39416    | 0.7769   | 0.94799 | ↓ | -0.077058 | 0.13836  | 0.54488 | 0.80996 | ↓ | -0.30408 |
| TAG512-FA182            | 0.05491    | 0.43372  | 1.4509  | ↑ | 0.53692   | 0.13866  | 0.54488 | 1.6209  | ↑ | 0.69681  |
| TAG544-FA182            | 0.86015    | 0.97815  | 1.5725  | ↑ | 0.6531    | 0.13922  | 0.54488 | 1.7688  | ↑ | 0.82277  |
| TAG524-FA181            | 0.34835    | 0.74884  | 1.3959  | ↑ | 0.4812    | 0.13967  | 0.54488 | 1.8136  | ↑ | 0.85883  |
| TAG441-FA120            | 0.69837    | 0.91456  | 0.96871 | ↓ | -0.04586  | 0.13975  | 0.54488 | 0.79348 | ↓ | -0.33374 |
| TAG422-FA120            | 0.027026   | 0.31041  | 0.47752 | ↓ | -1.0664   | 0.14129  | 0.54589 | 1.1806  | ↑ | 0.2395   |
| TAG421-FA140            | 0.306      | 0.71851  | 0.92833 | ↓ | -0.10729  | 0.14438  | 0.54709 | 0.89936 | ↓ | -0.15303 |
| TAG490-FA160            | 0.17582    | 0.57755  | 0.91039 | ↓ | -0.13544  | 0.14639  | 0.54709 | 0.90099 | ↓ | -0.15041 |
| TAG503-FA182            | 0.15987    | 0.56567  | 1.2267  | ↑ | 0.29482   | 0.14671  | 0.54709 | 1.6514  | ↑ | 0.72371  |



|                            |          |         |         |   |            |         |         |         |   |          |
|----------------------------|----------|---------|---------|---|------------|---------|---------|---------|---|----------|
| TAG400-FA140               | 0.26281  | 0.66099 | 0.86997 | ↓ | -0.20096   | 0.14685 | 0.54709 | 0.8422  | ↓ | -0.24777 |
| TAG462-FA161               | 0.48582  | 0.8292  | 0.92269 | ↓ | -0.11609   | 0.14827 | 0.54709 | 0.79185 | ↓ | -0.3367  |
| TAG567-FA160               | 0.090767 | 0.49873 | 1.0196  | ↑ | 0.027989   | 0.15142 | 0.54709 | 0.71542 | ↓ | -0.48314 |
| TAG510-FA170               | 0.58747  | 0.86994 | 0.95229 | ↓ | -0.070533  | 0.1515  | 0.54709 | 0.91159 | ↓ | -0.13354 |
| TAG521-FA181               | 0.086549 | 0.49707 | 1.3155  | ↑ | 0.39564    | 0.153   | 0.54709 | 1.681   | ↑ | 0.74929  |
| METHYL PHENYLACETATE_neg_3 | 0.21609  | 0.60821 | 0.3492  | ↓ | -1.5179    | 0.15329 | 0.54709 | 1.4383  | ↑ | 0.52435  |
| TAG513-FA150               | 0.66644  | 0.907   | 1.5715  | ↑ | 0.65217    | 0.15602 | 0.54709 | 2.3248  | ↑ | 1.2171   |
| TAG522-FA182               | 0.094908 | 0.49873 | 1.6914  | ↑ | 0.75821    | 0.15675 | 0.54709 | 2.0697  | ↑ | 1.0494   |
| TAG505-FA160               | 0.35824  | 0.75373 | 1.0472  | ↑ | 0.066475   | 0.15705 | 0.54709 | 0.77559 | ↓ | -0.36664 |
| DAG140/181                 | 0.22762  | 0.62122 | 0.8602  | ↓ | -0.21726   | 0.16027 | 0.55378 | 0.87106 | ↓ | -0.19916 |
| ASPARTATE_pos_3            | 0.86058  | 0.97815 | 0.80378 | ↓ | -0.31513   | 0.16633 | 0.56375 | 1.1634  | ↑ | 0.21831  |
| TAG502-FA161               | 0.73726  | 0.92978 | 0.98841 | ↓ | -0.016814  | 0.1674  | 0.56375 | 1.3533  | ↑ | 0.43645  |
| TAG587-FA160               | 0.79411  | 0.94763 | 0.9954  | ↓ | -0.0066447 | 0.16822 | 0.56375 | 0.86991 | ↓ | -0.20106 |
| TAG551-FA160               | 0.87839  | 0.97842 | 0.77047 | ↓ | -0.37619   | 0.16961 | 0.56375 | 1.2429  | ↑ | 0.31371  |
| AMINOADIPATE_pos_1         | 0.40873  | 0.78183 | 0.95384 | ↓ | -0.068184  | 0.16979 | 0.56375 | 0.79892 | ↓ | -0.32387 |
| TAG520-FA200               | 0.63315  | 0.90045 | 0.96393 | ↓ | -0.053005  | 0.17261 | 0.56869 | 0.71101 | ↓ | -0.49207 |
| TAG461-FA161               | 0.53496  | 0.84948 | 0.91943 | ↓ | -0.1212    | 0.18008 | 0.57493 | 0.81224 | ↓ | -0.30003 |
| TAG525-FA225               | 0.19282  | 0.59695 | 0.87785 | ↓ | -0.18796   | 0.18115 | 0.57493 | 0.86243 | ↓ | -0.21352 |
| DAG161/181                 | 0.05969  | 0.4362  | 0.76049 | ↓ | -0.395     | 0.18246 | 0.57493 | 0.87441 | ↓ | -0.19362 |
| TAG471-FA140               | 0.2772   | 0.6714  | 0.89647 | ↓ | -0.15767   | 0.1837  | 0.57493 | 0.82113 | ↓ | -0.28432 |
| TAG514-FA161               | 0.64223  | 0.90045 | 0.89902 | ↓ | -0.15358   | 0.18388 | 0.57493 | 0.88785 | ↓ | -0.17161 |
| LCER160                    | 0.085212 | 0.4961  | 0.81414 | ↓ | -0.29664   | 0.18463 | 0.57493 | 0.8489  | ↓ | -0.23634 |
| FFA181                     | 0.5127   | 0.84511 | 0.95224 | ↓ | -0.070602  | 0.1849  | 0.57493 | 0.61241 | ↓ | -0.70742 |
| CYSTEINE_neg_5             | 0.76056  | 0.94709 | 0.97633 | ↓ | -0.034558  | 0.18533 | 0.57493 | 1.6096  | ↑ | 0.68671  |
| TAG526-FA181               | 0.64622  | 0.90045 | 1.054   | ↑ | 0.075816   | 0.18929 | 0.58163 | 0.81094 | ↓ | -0.30233 |
| DAG160/204                 | 0.94893  | 0.98616 | 0.79754 | ↓ | -0.32638   | 0.19075 | 0.58163 | 1.5305  | ↑ | 0.61403  |
| TAG460-FA120               | 0.71697  | 0.91744 | 0.97097 | ↓ | -0.042502  | 0.19159 | 0.58163 | 0.91869 | ↓ | -0.12235 |
| FFA180                     | 0.87314  | 0.97842 | 1.0123  | ↑ | 0.01769    | 0.19568 | 0.58613 | 0.82324 | ↓ | -0.28062 |
| BIOTIN_pos_4               | 0.97581  | 0.98616 | 0.88633 | ↓ | -0.17408   | 0.1997  | 0.58613 | 1.0757  | ↑ | 0.10529  |
| TAG463-FA161               | 0.27635  | 0.6714  | 0.7953  | ↓ | -0.33043   | 0.20027 | 0.58613 | 0.91553 | ↓ | -0.12732 |
| TAG501-FA180               | 0.051117 | 0.42597 | 1.215   | ↑ | 0.28091    | 0.20124 | 0.58613 | 1.2853  | ↑ | 0.36216  |
| MALONYL-COA_pos_1          | 0.044842 | 0.39704 | 1.4725  | ↑ | 0.55825    | 0.20403 | 0.58613 | 1.3494  | ↑ | 0.43234  |
| TAG480-FA160               | 0.40129  | 0.77932 | 0.95457 | ↓ | -0.067072  | 0.20445 | 0.58613 | 0.87931 | ↓ | -0.18556 |
| TAG503-FA181               | 0.13277  | 0.55322 | 1.1018  | ↑ | 0.13984    | 0.20557 | 0.58613 | 1.243   | ↑ | 0.31386  |
| TAG582-FA181               | 0.017103 | 0.31041 | 1.79    | ↑ | 0.83999    | 0.20702 | 0.58613 | 1.8262  | ↑ | 0.86886  |
| TAG513-FA182               | 0.028543 | 0.31041 | 1.5139  | ↑ | 0.59822    | 0.20731 | 0.58613 | 1.7027  | ↑ | 0.76784  |
| TAG442-FA161               | 0.17666  | 0.57755 | 0.84407 | ↓ | -0.24457   | 0.2078  | 0.58613 | 0.81803 | ↓ | -0.28977 |
| TAG512-FA160               | 0.8887   | 0.97842 | 1.0116  | ↑ | 0.016688   | 0.20825 | 0.58613 | 0.8541  | ↓ | -0.22753 |
| TAG492-FA150               | 0.76823  | 0.94709 | 1.0374  | ↑ | 0.053031   | 0.21205 | 0.58648 | 1.1439  | ↑ | 0.19391  |

|                             |            |          |         |   |           |         |         |         |   |           |
|-----------------------------|------------|----------|---------|---|-----------|---------|---------|---------|---|-----------|
| TAG502-FA181                | 0.1304     | 0.5487   | 1.1464  | ↑ | 0.1971    | 0.21214 | 0.58648 | 1.4728  | ↑ | 0.55858   |
| TAG511-FA150                | 0.86535    | 0.97815  | 1.0279  | ↑ | 0.039652  | 0.21327 | 0.58648 | 1.2792  | ↑ | 0.3552    |
| TAG461-FA141                | 0.01166    | 0.30971  | 0.78077 | ↓ | -0.35702  | 0.21516 | 0.58648 | 0.9084  | ↓ | -0.1386   |
| CER160                      | 0.78055    | 0.94763  | 1.2038  | ↑ | 0.26765   | 0.21527 | 0.58648 | 2.5575  | ↑ | 1.3547    |
| MESACONIC ACID_pos_1        | 0.31038    | 0.72361  | 0.72214 | ↓ | -0.46964  | 0.22154 | 0.59451 | 1.3918  | ↑ | 0.4769    |
| TAG524-FA160                | 0.71225    | 0.91456  | 1.4319  | ↑ | 0.51795   | 0.22167 | 0.59451 | 1.4725  | ↑ | 0.55825   |
| TAG532-FA170                | 0.57453    | 0.86994  | 0.95192 | ↓ | -0.071082 | 0.22242 | 0.59451 | 1.2001  | ↑ | 0.2631    |
| DAG160/160                  | 0.95751    | 0.98616  | 1.0093  | ↑ | 0.01331   | 0.2249  | 0.59501 | 0.78332 | ↓ | -0.35233  |
| TAG511-FA160                | 0.15713    | 0.56567  | 0.92962 | ↓ | -0.10528  | 0.22746 | 0.59501 | 1.1191  | ↑ | 0.16229   |
| TAG504-FA182                | 0.3792     | 0.76877  | 1.1634  | ↑ | 0.21832   | 0.228   | 0.59501 | 1.3775  | ↑ | 0.46202   |
| TAG544-FA183                | 0.39667    | 0.7769   | 1.4385  | ↑ | 0.52456   | 0.22821 | 0.59501 | 1.2807  | ↑ | 0.35699   |
| TAG525-FA182                | 0.95324    | 0.98616  | 1.4457  | ↑ | 0.53178   | 0.23058 | 0.59754 | 1.5659  | ↑ | 0.64702   |
| TAG568-FA204                | 0.53429    | 0.84948  | 1.0658  | ↑ | 0.091934  | 0.23564 | 0.59786 | 0.8249  | ↓ | -0.27771  |
| TAG521-FA201                | 0.71884    | 0.91744  | 0.90928 | ↓ | -0.13721  | 0.23596 | 0.59786 | 1.1305  | ↑ | 0.17697   |
| TAG480-FA180                | 0.86538    | 0.97815  | 0.98431 | ↓ | -0.022812 | 0.23597 | 0.59786 | 0.93403 | ↓ | -0.098464 |
| TAG533-FA182                | 0.21503    | 0.60821  | 1.2881  | ↑ | 0.36524   | 0.2367  | 0.59786 | 1.4112  | ↑ | 0.49689   |
| DAG140/182                  | 0.47573    | 0.82568  | 0.79373 | ↓ | -0.33328  | 0.23774 | 0.59786 | 0.84782 | ↓ | -0.23817  |
| TAG563-FA202                | 0.89566    | 0.97842  | 1.0403  | ↑ | 0.056987  | 0.24028 | 0.60071 | 0.82273 | ↓ | -0.2815   |
| SM240                       | 0.00055593 | 0.078757 | 2.3847  | ↑ | 1.2538    | 0.24343 | 0.60339 | 0.76802 | ↓ | -0.38078  |
| TAG534-FA182                | 0.51082    | 0.84511  | 1.0597  | ↑ | 0.083591  | 0.24612 | 0.60339 | 0.84057 | ↓ | -0.25056  |
| TAG524-FA183                | 0.92736    | 0.98532  | 1.3083  | ↑ | 0.38774   | 0.24638 | 0.60339 | 1.563   | ↑ | 0.64428   |
| TAG555-FA181                | 0.56027    | 0.86903  | 1.0526  | ↑ | 0.07391   | 0.2505  | 0.60339 | 0.84011 | ↓ | -0.25135  |
| TAG471-FA160                | 0.34368    | 0.74884  | 0.89113 | ↓ | -0.1663   | 0.2512  | 0.60339 | 0.85433 | ↓ | -0.22713  |
| TAG503-FA160                | 0.2125     | 0.60821  | 1.4502  | ↑ | 0.53626   | 0.25124 | 0.60339 | 1.9573  | ↑ | 0.96888   |
| TAG451-FA150                | 0.33584    | 0.7434   | 0.91097 | ↓ | -0.13453  | 0.25515 | 0.60339 | 0.81104 | ↓ | -0.30215  |
| TAG462-FA140                | 0.70104    | 0.91456  | 0.93964 | ↓ | -0.089813 | 0.25521 | 0.60339 | 0.86196 | ↓ | -0.2143   |
| TAG540-FA160                | 0.22598    | 0.62122  | 1.0593  | ↑ | 0.08313   | 0.25547 | 0.60339 | 0.73096 | ↓ | -0.45213  |
| ATROLACTIC ACID_neg_2       | 0.1239     | 0.54053  | 0.57065 | ↓ | -0.80932  | 0.25739 | 0.60339 | 1.354   | ↑ | 0.43722   |
| PYRIDOXAMINE_pos_1          | 0.0088346  | 0.30971  | 1.5529  | ↑ | 0.63499   | 0.25805 | 0.60339 | 0.67669 | ↓ | -0.56344  |
| ALLANTOIN_neg_2             | 0.70842    | 0.91456  | 1.0274  | ↑ | 0.038955  | 0.25839 | 0.60339 | 0.95917 | ↓ | -0.060144 |
| DAG180/182                  | 0.18248    | 0.58265  | 0.86007 | ↓ | -0.21747  | 0.26083 | 0.60501 | 1.2403  | ↑ | 0.31074   |
| ARGININOSUCCINIC ACID_neg_2 | 0.018969   | 0.31041  | 0.56015 | ↓ | -0.83611  | 0.26194 | 0.60501 | 1.0459  | ↑ | 0.064713  |
| TAG524-FA182                | 0.7901     | 0.94763  | 1.4869  | ↑ | 0.57232   | 0.26677 | 0.61285 | 1.6211  | ↑ | 0.69698   |
| TAG565-FA225                | 0.93936    | 0.98616  | 0.96339 | ↓ | -0.053806 | 0.27037 | 0.61349 | 0.8715  | ↓ | -0.19842  |
| N-ACETYLORNITHINE_neg_3     | 0.1401     | 0.56567  | 0.8215  | ↓ | -0.28367  | 0.2725  | 0.61349 | 1.2297  | ↑ | 0.29826   |
| TAG490-FA150                | 0.19021    | 0.59441  | 0.92362 | ↓ | -0.11462  | 0.27256 | 0.61349 | 0.92851 | ↓ | -0.10702  |
| TAG567-FA226                | 0.0022488  | 0.13654  | 1.751   | ↑ | 0.80821   | 0.27533 | 0.61349 | 1.5023  | ↑ | 0.58719   |
| TAG482-FA141                | 0.20206    | 0.60053  | 0.88418 | ↓ | -0.17759  | 0.27826 | 0.61349 | 1.0857  | ↑ | 0.11861   |
| PHENYLPROPIOLIC ACID_neg_1  | 0.0072568  | 0.30971  | 1.515   | ↑ | 0.59929   | 0.28064 | 0.61349 | 0.80911 | ↓ | -0.3056   |



|                               |          |         |         |            |         |         |         |           |
|-------------------------------|----------|---------|---------|------------|---------|---------|---------|-----------|
| TAG543-FA202                  | 0.84866  | 0.97745 | 1.047   | 0.066261   | 0.28312 | 0.61349 | 0.82916 | -0.27028  |
| TAG512-FA181                  | 0.41023  | 0.78183 | 1.059   | 0.082721   | 0.2854  | 0.61349 | 0.92805 | -0.10773  |
| TAG491-FA161                  | 0.54609  | 0.85327 | 0.9111  | -0.13431   | 0.28683 | 0.61349 | 0.82722 | -0.27365  |
| TAG510-FA180                  | 0.48195  | 0.82593 | 1.0455  | 0.064151   | 0.28777 | 0.61349 | 0.95243 | -0.070311 |
| TAG491-FA181                  | 0.90756  | 0.98112 | 0.99645 | -0.0051269 | 0.28787 | 0.61349 | 1.0554  | 0.07783   |
| GLUCOSE 1-PHOSPHATE_pos_2     | 0.24806  | 0.65077 | 0.64373 | -0.63547   | 0.28814 | 0.61349 | 0.87181 | -0.19791  |
| TAG420-FA160                  | 0.78394  | 0.94763 | 0.95459 | -0.067047  | 0.28822 | 0.61349 | 0.91282 | -0.1316   |
| TAG480-FA140                  | 0.64186  | 0.90045 | 0.9675  | -0.047673  | 0.28909 | 0.61349 | 0.94683 | -0.078817 |
| TAG421-FA120                  | 0.16238  | 0.56567 | 0.88133 | -0.18225   | 0.28929 | 0.61349 | 0.79785 | -0.3258   |
| TAG540-FA180                  | 0.7982   | 0.94763 | 0.97978 | -0.029467  | 0.29073 | 0.61349 | 0.8407  | -0.25033  |
| TAG564-FA202                  | 0.7689   | 0.94709 | 1.046   | 0.064925   | 0.29159 | 0.61349 | 0.83655 | -0.25748  |
| TAG511-FA181                  | 0.1139   | 0.53256 | 1.1563  | 0.20952    | 0.2941  | 0.61572 | 1.1548  | 0.20769   |
| TAG564-FA182                  | 0.28468  | 0.68283 | 1.7076  | 0.77201    | 0.29827 | 0.61602 | 2.031   | 1.0222    |
| TAG502-FA140                  | 0.52484  | 0.84948 | 1.0893  | 0.12339    | 0.30014 | 0.61602 | 1.4279  | 0.51393   |
| TAG505-FA205                  | 0.388    | 0.77418 | 0.93916 | -0.090557  | 0.30453 | 0.61602 | 0.90119 | -0.1501   |
| TAG460-FA180                  | 0.80944  | 0.95031 | 1.0153  | 0.02188    | 0.3052  | 0.61602 | 0.93718 | -0.093602 |
| TAG566-FA202                  | 0.15339  | 0.56567 | 1.123   | 0.16731    | 0.30634 | 0.61602 | 0.85328 | -0.2289   |
| TAG532-FA181                  | 0.72818  | 0.92381 | 1.0322  | 0.045672   | 0.30722 | 0.61602 | 0.88407 | -0.17776  |
| TAG501-FA161                  | 0.68259  | 0.91227 | 1.0057  | 0.0082388  | 0.3074  | 0.61602 | 1.1219  | 0.16594   |
| TAG501-FA181                  | 0.50505  | 0.84511 | 1.057   | 0.079982   | 0.30893 | 0.61602 | 1.2818  | 0.3582    |
| TAG520-FA160                  | 0.80047  | 0.94763 | 0.98749 | -0.01816   | 0.31051 | 0.61602 | 0.845   | -0.24298  |
| TAG565-FA202                  | 0.66602  | 0.907   | 1.0528  | 0.074216   | 0.31174 | 0.61602 | 0.83237 | -0.26471  |
| L-CARNITINE_pos_1             | 0.050559 | 0.42597 | 0.47649 | -1.0695    | 0.31276 | 0.61602 | 0.8066  | -0.31007  |
| 4-AMINOBENZOIC ACID_pos_1     | 0.45589  | 0.8244  | 1.2684  | 0.34296    | 0.31555 | 0.61602 | 0.84079 | -0.25019  |
| TAG562-FA160                  | 0.20659  | 0.60554 | 1.2289  | 0.29739    | 0.31699 | 0.61602 | 1.5384  | 0.62145   |
| TAG545-FA182                  | 0.7231   | 0.92012 | 1.4836  | 0.56915    | 0.31743 | 0.61602 | 1.2358  | 0.30544   |
| BUTYRYL-COA_pos_1             | 0.67701  | 0.90766 | 0.62669 | -0.67418   | 0.31865 | 0.61602 | 1.5721  | 0.65272   |
| 3-METHYLAMINO-L-ALANINE_pos_2 | 0.80364  | 0.9483  | 0.98248 | -0.025498  | 0.31898 | 0.61602 | 0.82363 | -0.27993  |
| TAG545-FA225                  | 0.33535  | 0.7434  | 0.91146 | -0.13374   | 0.32004 | 0.61602 | 0.8618  | -0.21458  |
| TAG471-FA150                  | 0.53694  | 0.84948 | 0.90172 | -0.14926   | 0.32114 | 0.61602 | 0.85871 | -0.21975  |
| TAG442-FA120                  | 0.66929  | 0.907   | 0.97794 | -0.032176  | 0.32264 | 0.61602 | 0.84422 | -0.24431  |
| TAG492-FA160                  | 0.91879  | 0.98112 | 1.0194  | 0.027666   | 0.32323 | 0.61602 | 1.1427  | 0.19249   |
| TAG492-FA161                  | 0.39587  | 0.7769  | 0.88192 | -0.18127   | 0.3269  | 0.61915 | 0.83008 | -0.26868  |
| TAG555-FA182                  | 0.94592  | 0.98616 | 1.0753  | 0.10467    | 0.32778 | 0.61915 | 0.84334 | -0.24581  |
| ACETYLPHOSPHATE_pos_1         | 0.37313  | 0.76877 | 1.2038  | 0.26759    | 0.33413 | 0.62833 | 0.86084 | -0.21619  |
| ACETYL-COA_pos_1              | 0.18371  | 0.58265 | 0.96733 | -0.047921  | 0.33706 | 0.63106 | 1.2708  | 0.34569   |
| TAG472-FA140                  | 0.8595   | 0.97815 | 0.95327 | -0.069049  | 0.33905 | 0.63201 | 0.81929 | -0.28756  |
| TAG545-FA181                  | 0.67418  | 0.907   | 1.379   | 0.46367    | 0.34513 | 0.63967 | 1.1566  | 0.20987   |
| HCER201                       | 0.75127  | 0.94186 | 0.66548 | -0.58754   | 0.34617 | 0.63967 | 0.69376 | -0.52749  |

|                                  |             |          |         |            |         |         |         |           |
|----------------------------------|-------------|----------|---------|------------|---------|---------|---------|-----------|
| TAG481-FA160                     | 0.523       | 0.84948  | 1.0314  | 0.044628   | 0.35175 | 0.64717 | 1.1075  | 0.14732   |
| TAG542-FA201                     | 0.16234     | 0.56567  | 1.1878  | 0.2483     | 0.35452 | 0.64945 | 1.3979  | 0.4833    |
| TAG491-FA150                     | 0.87686     | 0.97842  | 1.0268  | 0.038208   | 0.3573  | 0.64995 | 1.1062  | 0.14557   |
| TAG482-FA161                     | 0.52944     | 0.84948  | 0.88934 | -0.16919   | 0.36019 | 0.64995 | 0.84707 | -0.23945  |
| ADP_pos_1                        | 0.31413     | 0.72556  | 0.98866 | -0.016453  | 0.36076 | 0.64995 | 1.2042  | 0.26805   |
| TAG472-FA182                     | 0.69655     | 0.91456  | 1.0018  | 0.0025886  | 0.36091 | 0.64995 | 0.87701 | -0.18934  |
| MEVALONOLACTONE_pos_2            | 0.95592     | 0.98616  | 0.84707 | -0.23945   | 0.36916 | 0.662   | 1.0743  | 0.10333   |
| CE182                            | 0.49224     | 0.83477  | 0.45996 | -1.1204    | 0.37856 | 0.676   | 7.2083  | 2.8497    |
| GERANYL-PP_-HPO3_neg_2           | 0.79502     | 0.94763  | 0.93578 | -0.095761  | 0.39315 | 0.69732 | 1.195   | 0.25703   |
| N-ACETYLLALANINE_pos_2           | 0.76522     | 0.94709  | 1.0597  | 0.083667   | 0.39384 | 0.69732 | 1.5383  | 0.62133   |
| BUTYRYL-COA_neg_2                | 0.54482     | 0.85327  | 0.83118 | -0.26677   | 0.39622 | 0.69732 | 1.5296  | 0.61315   |
| TAG554-FA181                     | 0.88967     | 0.97842  | 1.0207  | 0.029494   | 0.39789 | 0.69732 | 0.83313 | -0.26339  |
| TAG483-FA181                     | 0.87504     | 0.97842  | 0.99613 | -0.0055985 | 0.40106 | 0.69732 | 1.1235  | 0.16798   |
| SYMMETRIC DIMETHYLARGININE_pos_1 | 0.97782     | 0.98616  | 1.0331  | 0.046969   | 0.40351 | 0.69732 | 1.3991  | 0.48445   |
| TAG566-FA225                     | 0.11448     | 0.53256  | 1.1163  | 0.15867    | 0.40409 | 0.69732 | 0.92011 | -0.12012  |
| TAG492-FA182                     | 0.34887     | 0.74884  | 1.1291  | 0.17523    | 0.40659 | 0.69732 | 1.2276  | 0.29579   |
| DAG181/182                       | 0.65256     | 0.90045  | 0.98527 | -0.021403  | 0.408   | 0.69732 | 0.91303 | -0.13127  |
| TAG503-FA161                     | 0.95025     | 0.98616  | 1.0103  | 0.014714   | 0.40959 | 0.69732 | 1.236   | 0.30568   |
| TAG491-FA170                     | 0.61829     | 0.89076  | 0.92131 | -0.11824   | 0.40992 | 0.69732 | 0.82326 | -0.28057  |
| TAG490-FA180                     | 0.9478      | 0.98616  | 0.9946  | -0.0078077 | 0.41071 | 0.69732 | 0.95922 | -0.060069 |
| TAG587-FA225                     | 0.069515    | 0.46162  | 1.0147  | 0.021117   | 0.41213 | 0.69732 | 0.6592  | -0.60122  |
| TAG500-FA180                     | 0.90096     | 0.9793   | 1.0117  | 0.016735   | 0.41677 | 0.69732 | 0.87971 | -0.1849   |
| TAG461-FA140                     | 0.66747     | 0.907    | 0.95063 | -0.073038  | 0.4177  | 0.69732 | 0.88641 | -0.17395  |
| TAG421-FA161                     | 0.25977     | 0.66099  | 0.92173 | -0.11759   | 0.41804 | 0.69732 | 0.80219 | -0.31798  |
| TAG504-FA160                     | 0.019008    | 0.31041  | 1.3096  | 0.38912    | 0.42106 | 0.69732 | 1.2199  | 0.28675   |
| TAG440-FA180                     | 0.78943     | 0.94763  | 1.0235  | 0.033449   | 0.42303 | 0.69732 | 0.93849 | -0.09159  |
| TAG400-FA160                     | 0.97532     | 0.98616  | 0.98532 | -0.021331  | 0.42313 | 0.69732 | 0.94348 | -0.083935 |
| TAG442-FA140                     | 0.014235    | 0.31041  | 0.60969 | -0.71385   | 0.42332 | 0.69732 | 1.0472  | 0.066497  |
| SM220                            | 0.000026818 | 0.011398 | 2.3142  | 1.2105     | 0.43064 | 0.70664 | 0.992   | -0.011584 |
| TAG520-FA180                     | 0.8194      | 0.95671  | 0.99094 | -0.013133  | 0.4377  | 0.71546 | 0.86288 | -0.21277  |
| TAG462-FA181                     | 0.71012     | 0.91456  | 1.0885  | 0.12234    | 0.44068 | 0.71759 | 0.97103 | -0.042407 |
| TAG568-FA205                     | 0.68749     | 0.91456  | 0.98449 | -0.022552  | 0.4535  | 0.73564 | 0.8021  | -0.31815  |
| TAG481-FA161                     | 0.67251     | 0.907    | 0.93354 | -0.099211  | 0.46045 | 0.74257 | 0.89854 | -0.15435  |
| TAG483-FA160                     | 0.78927     | 0.94763  | 0.97077 | -0.042794  | 0.46126 | 0.74257 | 1.2385  | 0.30865   |
| TAG472-FA150                     | 0.79417     | 0.94763  | 0.90351 | -0.14638   | 0.46469 | 0.74525 | 0.86258 | -0.21327  |
| O-ACETYLSERINE_pos_3             | 0.53631     | 0.84948  | 0.98292 | -0.024858  | 0.47036 | 0.75091 | 1.036   | 0.051046  |
| L-ACETYLCARNITINE_pos_1          | 0.97146     | 0.98616  | 0.90076 | -0.15078   | 0.47175 | 0.75091 | 1.1539  | 0.20648   |
| TAG544-FA180                     | 0.93677     | 0.98616  | 1.3423  | 0.42472    | 0.48381 | 0.76724 | 1.1989  | 0.26175   |
| CE205                            | 0.67438     | 0.907    | 1.0556  | 0.078076   | 0.48784 | 0.77076 | 2.468   | 1.3033    |



|                         |           |         |         |   |           |         |         |         |   |           |
|-------------------------|-----------|---------|---------|---|-----------|---------|---------|---------|---|-----------|
| TAG563-FA181            | 0.24777   | 0.65077 | 1.0933  | ↑ | 0.12865   | 0.49253 | 0.77117 | 0.89035 | ↓ | -0.16755  |
| TAG441-FA160            | 0.89701   | 0.97842 | 1.0221  | ↑ | 0.031565  | 0.49327 | 0.77117 | 0.97455 | ↓ | -0.037189 |
| TAG501-FA140            | 0.12524   | 0.54053 | 1.1976  | ↑ | 0.26013   | 0.49512 | 0.77117 | 1.1505  | ↑ | 0.20232   |
| TAG461-FA180            | 0.64197   | 0.90045 | 1.0694  | ↑ | 0.096841  | 0.49536 | 0.77117 | 0.99071 | ↓ | -0.013471 |
| TAG463-FA181            | 0.20021   | 0.60053 | 1.1664  | ↑ | 0.22205   | 0.5045  | 0.77678 | 1.1301  | ↑ | 0.17644   |
| TAG482-FA160            | 0.89564   | 0.97842 | 0.98286 | ↓ | -0.024937 | 0.50595 | 0.77678 | 1.0743  | ↑ | 0.10335   |
| TAG481-FA180            | 0.47684   | 0.82568 | 1.0509  | ↑ | 0.071575  | 0.50626 | 0.77678 | 1.0261  | ↑ | 0.037211  |
| PIPECOLATE_pos_3        | 0.45484   | 0.8244  | 0.75461 | ↓ | -0.40619  | 0.50901 | 0.77678 | 1.1401  | ↑ | 0.18921   |
| TAG441-FA181            | 0.52323   | 0.84948 | 1.1492  | ↑ | 0.20067   | 0.51007 | 0.77678 | 0.98086 | ↓ | -0.027881 |
| TAG568-FA160            | 0.070961  | 0.46397 | 0.74672 | ↓ | -0.42136  | 0.51041 | 0.77678 | 1.1541  | ↑ | 0.20675   |
| TAG511-FA180            | 0.023828  | 0.31041 | 1.2331  | ↑ | 0.30233   | 0.51322 | 0.77678 | 1.1463  | ↑ | 0.19701   |
| TAG587-FA180            | 0.020808  | 0.31041 | 1.1229  | ↑ | 0.16717   | 0.51359 | 0.77678 | 0.74815 | ↓ | -0.4186   |
| TAG553-FA181            | 0.53767   | 0.84948 | 0.97485 | ↓ | -0.036742 | 0.51715 | 0.77818 | 0.89034 | ↓ | -0.16758  |
| DAG160/182              | 0.1716    | 0.57755 | 0.91397 | ↓ | -0.12978  | 0.51817 | 0.77818 | 0.92312 | ↓ | -0.11542  |
| TAG541-FA200            | 0.64339   | 0.90045 | 1.0262  | ↑ | 0.037378  | 0.52073 | 0.77926 | 1.5291  | ↑ | 0.61264   |
| TAG421-FA160            | 0.70207   | 0.91456 | 1.0841  | ↑ | 0.11643   | 0.52698 | 0.78585 | 1.0018  | ↑ | 0.002578  |
| TAG503-FA141            | 0.71228   | 0.91456 | 0.98898 | ↓ | -0.015987 | 0.53325 | 0.79242 | 1.1742  | ↑ | 0.23171   |
| CHOLINE_pos_1           | 0.075417  | 0.47839 | 0.42092 | ↓ | -1.2484   | 0.53639 | 0.7943  | 1.1178  | ↑ | 0.16063   |
| CE150                   | 0.33297   | 0.7434  | 0.92017 | ↓ | -0.12003  | 0.54231 | 0.79859 | 0.89271 | ↓ | -0.16373  |
| SM180                   | 0.16819   | 0.57186 | 1.085   | ↑ | 0.11765   | 0.54372 | 0.79859 | 0.87068 | ↓ | -0.19979  |
| TAG481-FA140            | 0.2724    | 0.66919 | 1.0897  | ↑ | 0.12389   | 0.54492 | 0.79859 | 1.1252  | ↑ | 0.17016   |
| TAG522-FA202            | 0.14703   | 0.56567 | 0.8583  | ↓ | -0.22044  | 0.5508  | 0.80195 | 1.075   | ↑ | 0.10438   |
| FFA204                  | 0.13619   | 0.55653 | 0.81698 | ↓ | -0.29163  | 0.55099 | 0.80195 | 1.1324  | ↑ | 0.17936   |
| TAG513-FA161            | 0.0099529 | 0.30971 | 0.65199 | ↓ | -0.61708  | 0.56215 | 0.80548 | 0.9586  | ↓ | -0.060996 |
| N-ACETYLGLUTAMINE_pos_2 | 0.28599   | 0.68283 | 0.84536 | ↓ | -0.24236  | 0.56231 | 0.80548 | 1.373   | ↑ | 0.45735   |
| CE160                   | 0.78254   | 0.94763 | 1.0354  | ↑ | 0.050257  | 0.56288 | 0.80548 | 1.1637  | ↑ | 0.2187    |
| TAG492-FA140            | 0.76742   | 0.94709 | 0.92926 | ↓ | -0.10585  | 0.56555 | 0.80548 | 0.99185 | ↓ | -0.0118   |
| TAG461-FA181            | 0.59941   | 0.88149 | 1.0968  | ↑ | 0.13326   | 0.56588 | 0.80548 | 0.98977 | ↓ | -0.01484  |
| TAG492-FA181            | 0.5905    | 0.8714  | 0.91758 | ↓ | -0.12409  | 0.56661 | 0.80548 | 0.89933 | ↓ | -0.15308  |
| TAG545-FA183            | 0.34659   | 0.74884 | 1.2682  | ↑ | 0.34279   | 0.56824 | 0.80548 | 1.1347  | ↑ | 0.18233   |
| TAG561-FA181            | 0.23044   | 0.62381 | 1.0834  | ↑ | 0.11555   | 0.57103 | 0.80548 | 0.95019 | ↓ | -0.073705 |
| TAG562-FA180            | 0.2541    | 0.65849 | 1.2121  | ↑ | 0.27746   | 0.57266 | 0.80548 | 1.2405  | ↑ | 0.31096   |
| SPERMIDINE_pos_2        | 0.91556   | 0.98112 | 1.0182  | ↑ | 0.026063  | 0.57425 | 0.80548 | 0.80689 | ↓ | -0.30956  |
| TAG568-FA161            | 0.098253  | 0.50224 | 1.1499  | ↑ | 0.20157   | 0.57588 | 0.80548 | 0.95821 | ↓ | -0.061584 |
| TAG493-FA161            | 0.64992   | 0.90045 | 0.92193 | ↓ | -0.11727  | 0.57616 | 0.80548 | 0.8708  | ↓ | -0.19959  |
| TAG512-FA161            | 0.0087817 | 0.30971 | 0.65627 | ↓ | -0.60763  | 0.58138 | 0.80582 | 0.9634  | ↓ | -0.053794 |
| FFA201                  | 0.22665   | 0.62122 | 0.88412 | ↓ | -0.17769  | 0.5815  | 0.80582 | 0.97363 | ↓ | -0.038558 |
| TAG589-FA226            | 0.084658  | 0.4961  | 1.5366  | ↑ | 0.61978   | 0.58279 | 0.80582 | 1.1854  | ↑ | 0.24543   |
| TAG545-FA205            | 0.5848    | 0.86994 | 0.85511 | ↓ | -0.22581  | 0.58398 | 0.80582 | 0.87671 | ↓ | -0.18983  |

|                                      |           |         |         |   |           |         |         |         |   |           |
|--------------------------------------|-----------|---------|---------|---|-----------|---------|---------|---------|---|-----------|
| 2-HYDROXY-3-METHYLBUTYRIC ACID_pos_1 | 0.88193   | 0.97842 | 0.90997 | ↓ | -0.13611  | 0.58959 | 0.81093 | 0.98204 | ↓ | -0.026145 |
| TAG461-FA160                         | 0.77327   | 0.94709 | 0.97917 | ↓ | -0.03037  | 0.59546 | 0.81611 | 0.93019 | ↓ | -0.10441  |
| TAG526-FA160                         | 0.041052  | 0.39652 | 1.3942  | ↑ | 0.47939   | 0.60028 | 0.81611 | 1.1312  | ↑ | 0.1779    |
| TAG525-FA205                         | 0.91301   | 0.98112 | 1.0737  | ↑ | 0.10253   | 0.60055 | 0.81611 | 1.1991  | ↑ | 0.262     |
| TAG567-FA225                         | 0.078603  | 0.48415 | 1.0431  | ↑ | 0.060917  | 0.60104 | 0.81611 | 0.64328 | ↓ | -0.63649  |
| URIDINE 5-DIPHOSPHATE_neg_2          | 0.0093381 | 0.30971 | 0.53983 | ↓ | -0.88943  | 0.60402 | 0.81754 | 1.0139  | ↑ | 0.019965  |
| FFA226                               | 0.15121   | 0.56567 | 0.82832 | ↓ | -0.27174  | 0.60733 | 0.81942 | 0.93226 | ↓ | -0.1012   |
| TAG500-FA160                         | 0.97529   | 0.98616 | 1.0188  | ↑ | 0.026836  | 0.61385 | 0.82559 | 0.90041 | ↓ | -0.15134  |
| TAG442-FA182                         | 0.61066   | 0.88757 | 1.0872  | ↑ | 0.12065   | 0.61793 | 0.82846 | 1.0018  | ↑ | 0.0025802 |
| TAG521-FA161                         | 0.029483  | 0.31041 | 0.79878 | ↓ | -0.32414  | 0.6202  | 0.82889 | 1.045   | ↑ | 0.063456  |
| TAG523-FA183                         | 0.88563   | 0.97842 | 1.0674  | ↑ | 0.094083  | 0.62582 | 0.8331  | 1.0394  | ↑ | 0.055801  |
| OXOGLUTARATE_neg_2                   | 0.011436  | 0.30971 | 2.5043  | ↑ | 1.3244    | 0.62728 | 0.8331  | 0.8907  | ↓ | -0.16699  |
| TAG441-FA141                         | 0.8703    | 0.97842 | 0.98426 | ↓ | -0.022886 | 0.63374 | 0.83653 | 0.88701 | ↓ | -0.17298  |
| TAG532-FA160                         | 0.16459   | 0.5687  | 0.76318 | ↓ | -0.3899   | 0.6338  | 0.83653 | 1.0517  | ↑ | 0.072792  |
| TAG461-FA120                         | 0.7584    | 0.94709 | 1.0712  | ↑ | 0.099253  | 0.63939 | 0.83739 | 0.94164 | ↓ | -0.086746 |
| TAG493-FA160                         | 0.52584   | 0.84948 | 0.78727 | ↓ | -0.34507  | 0.64158 | 0.83739 | 1.1777  | ↑ | 0.23599   |
| TAG491-FA160                         | 0.975     | 0.98616 | 0.98836 | ↓ | -0.01689  | 0.64379 | 0.83739 | 1.0108  | ↑ | 0.01548   |
| TAG526-FA182                         | 0.24046   | 0.63872 | 1.2349  | ↑ | 0.30439   | 0.64426 | 0.83739 | 1.0194  | ↑ | 0.027778  |
| DAG181/204                           | 0.028678  | 0.31041 | 0.67151 | ↓ | -0.57452  | 0.6443  | 0.83739 | 1.1242  | ↑ | 0.16886   |
| ASCORBATE_neg_2                      | 0.10931   | 0.53251 | 0.73765 | ↓ | -0.439    | 0.64811 | 0.83978 | 0.79561 | ↓ | -0.32987  |
| FFA241                               | 0.56857   | 0.86994 | 0.93372 | ↓ | -0.098935 | 0.65594 | 0.84199 | 0.87944 | ↓ | -0.18535  |
| TAG528-FA161                         | 0.92287   | 0.983   | 0.90044 | ↓ | -0.15129  | 0.6581  | 0.84199 | 0.88331 | ↓ | -0.179    |
| TAG482-FA140                         | 0.29782   | 0.70319 | 1.0455  | ↑ | 0.064199  | 0.65888 | 0.84199 | 1.0744  | ↑ | 0.10353   |
| DAG180/181                           | 0.22802   | 0.62122 | 0.86148 | ↓ | -0.21511  | 0.66091 | 0.84199 | 0.97144 | ↓ | -0.041809 |
| SM261                                | 0.027958  | 0.31041 | 1.6345  | ↑ | 0.70885   | 0.66214 | 0.84199 | 0.98469 | ↓ | -0.02226  |
| NADPH_pos_1                          | 0.84075   | 0.97251 | 0.95863 | ↓ | -0.060953 | 0.66289 | 0.84199 | 0.64243 | ↓ | -0.63839  |
| 4-IMIDAZOLEACETATE_pos_1             | 0.044438  | 0.39704 | 0.56138 | ↓ | -0.83296  | 0.66582 | 0.84199 | 1.1826  | ↑ | 0.242     |
| 2-KETOHEXANOIC ACID_pos_2            | 0.91434   | 0.98112 | 0.8459  | ↓ | -0.24145  | 0.66653 | 0.84199 | 1.0091  | ↑ | 0.013065  |
| TAG482-FA181                         | 0.98838   | 0.99072 | 0.9904  | ↓ | -0.013913 | 0.66765 | 0.84199 | 0.99014 | ↓ | -0.014298 |
| TAG546-FA226                         | 0.063156  | 0.44735 | 1.3306  | ↑ | 0.41208   | 0.6716  | 0.84447 | 0.98521 | ↓ | -0.021498 |
| TAG533-FA160                         | 0.65256   | 0.90045 | 1.0493  | ↑ | 0.069447  | 0.67793 | 0.8482  | 1.0233  | ↑ | 0.033253  |
| TAG563-FA182                         | 0.90907   | 0.98112 | 1.2047  | ↑ | 0.26869   | 0.67976 | 0.8482  | 1.4835  | ↑ | 0.56898   |
| UREIDOSUCCINIC ACID_neg_2            | 0.9715    | 0.98616 | 0.90964 | ↓ | -0.13663  | 0.68065 | 0.8482  | 1.3336  | ↑ | 0.41533   |
| FFA202                               | 0.27142   | 0.66919 | 0.89649 | ↓ | -0.15763  | 0.68255 | 0.8482  | 0.98147 | ↓ | -0.02698  |
| TAG542-FA202                         | 0.51303   | 0.84511 | 1.0579  | ↑ | 0.081239  | 0.68684 | 0.85104 | 0.95686 | ↓ | -0.063613 |
| TAG531-FA180                         | 0.73611   | 0.92978 | 1.0519  | ↑ | 0.072976  | 0.69318 | 0.8564  | 1.0032  | ↑ | 0.0045745 |
| TAG462-FA120                         | 0.33874   | 0.74524 | 1.1214  | ↑ | 0.16526   | 0.70043 | 0.86285 | 0.92425 | ↓ | -0.11365  |
| TAG462-FA160                         | 0.050566  | 0.42597 | 0.79281 | ↓ | -0.33495  | 0.70541 | 0.86647 | 1.0145  | ↑ | 0.02073   |
| CE161                                | 0.37957   | 0.76877 | 0.92525 | ↓ | -0.11209  | 0.71269 | 0.8704  | 0.92264 | ↓ | -0.11615  |



|                                |          |         |         |   |            |         |         |         |      |            |
|--------------------------------|----------|---------|---------|---|------------|---------|---------|---------|------|------------|
| L-2-HYDROXYGLUTARIC ACID_neg_1 | 0.065294 | 0.44981 | 1.8861  | ↑ | 0.91543    | 0.7127  | 0.8704  | 1.021   | ↑    | 0.029987   |
| TAG511-FA170                   | 0.20138  | 0.60053 | 0.9041  | ↓ | -0.14544   | 0.71601 | 0.87194 | 0.96894 | ↓    | -0.04552   |
| DCER260                        | 0.61399  | 0.88757 | 0.99247 | ↓ | -0.010898  | 0.72066 | 0.87363 | 0.94206 | ↓    | -0.086111  |
| N-GLYCYL-L-PROLINE_pos_1       | 0.77212  | 0.94709 | 1.0784  | ↑ | 0.10892    | 0.72191 | 0.87363 | 1.0508  | ↑    | 0.071493   |
| TAG533-FA170                   | 0.57017  | 0.86994 | 0.93801 | ↓ | -0.092332  | 0.72357 | 0.87363 | 1.0361  | ↑    | 0.051148   |
| PROPIONYL-COA_pos_1            | 0.10174  | 0.50868 | 1.3275  | ↑ | 0.40873    | 0.72625 | 0.87426 | 1.1964  | ↑    | 0.25874    |
| TAG482-FA120                   | 0.45151  | 0.8244  | 1.1034  | ↑ | 0.14194    | 0.72821 | 0.87426 | 1.1659  | ↑    | 0.22146    |
| TAG552-FA181                   | 0.31158  | 0.72361 | 0.83019 | ↓ | -0.26849   | 0.73222 | 0.8766  | 0.95948 | ↓    | -0.05967   |
| BETAINE_pos_2                  | 0.36864  | 0.76801 | 0.80015 | ↓ | -0.32166   | 0.74072 | 0.88202 | 0.96494 | ↓    | -0.051484  |
| TAG546-FA182                   | 0.4636   | 0.8244  | 1.4502  | ↑ | 0.53629    | 0.74161 | 0.88202 | 0.90009 | ↓    | -0.15185   |
| FFA203                         | 0.16024  | 0.56567 | 0.84543 | ↓ | -0.24224   | 0.74297 | 0.88202 | 0.92849 | ↓    | -0.10704   |
| L-DIHYDROOROTIC ACID_neg_1     | 0.33463  | 0.7434  | 0.72602 | ↓ | -0.46192   | 0.7574  | 0.89665 | 1.1545  | ↑    | 0.20732    |
| HCER160                        | 0.11185  | 0.53256 | 0.71283 | ↓ | -0.48837   | 0.75954 | 0.89668 | 0.90171 | ↓    | -0.14926   |
| MYOINOSITOL_neg_3              | 0.8055   | 0.9483  | 1.0603  | ↑ | 0.084504   | 0.77309 | 0.90242 | 0.99934 | ↓    | -0.0009508 |
| DAG161/182                     | 0.025004 | 0.31041 | 0.59619 | ↓ | -0.74616   | 0.77343 | 0.90242 | 1.1024  | ↑    | 0.14062    |
| TAG483-FA120                   | 0.01534  | 0.31041 | 1.3103  | ↑ | 0.38988    | 0.77454 | 0.90242 | 1.1703  | ↑    | 0.22683    |
| TAG541-FA181                   | 0.38284  | 0.76877 | 1.0802  | ↑ | 0.1113     | 0.77722 | 0.90242 | 0.93592 | ↓    | -0.095539  |
| TAG481-FA181                   | 0.4587   | 0.8244  | 1.0729  | ↑ | 0.10148    | 0.77948 | 0.90242 | 1.0798  | ↑    | 0.11072    |
| MESACONIC ACID_neg_1           | 0.66417  | 0.907   | 1.2123  | ↑ | 0.27778    | 0.7813  | 0.90242 | 1.0882  | ↑    | 0.12198    |
| FFA205                         | 0.29663  | 0.70319 | 0.8646  | ↓ | -0.2099    | 0.78298 | 0.90242 | 1.0814  | ↑    | 0.11286    |
| TAG525-FA181                   | 0.21391  | 0.60821 | 1.089   | ↑ | 0.12297    | 0.78531 | 0.90242 | 0.98068 | ↓    | -0.028144  |
| CE140                          | 0.13475  | 0.55602 | 1.1445  | ↑ | 0.19471    | 0.78555 | 0.90242 | 0.88331 | ↓    | -0.17901   |
| TAG421-FA181                   | 0.57802  | 0.86994 | 1.1272  | ↑ | 0.17268    | 0.78564 | 0.90242 | 1.0254  | ↑    | 0.036238   |
| TAG524-FA180                   | 0.27804  | 0.6714  | 1.1183  | ↑ | 0.16129    | 0.7949  | 0.90713 | 0.98499 | ↓    | -0.021819  |
| TAG442-FA160                   | 0.35597  | 0.75267 | 0.9091  | ↓ | -0.1375    | 0.79515 | 0.90713 | 1.0906  | ↑    | 0.12517    |
| N-ACETYLLALANINE_neg_1         | 0.10636  | 0.5256  | 1.5384  | ↑ | 0.62146    | 0.79614 | 0.90713 | 0.79986 | ↓    | -0.32218   |
| TAG503-FA183                   | 0.090845 | 0.49873 | 1.1542  | ↑ | 0.20692    | 0.79981 | 0.90799 | 0.97278 | ↓    | -0.039807  |
| SM241                          | 0.024886 | 0.31041 | 1.4469  | ↑ | 0.53298    | 0.80302 | 0.90799 | 0.86877 | ↓    | -0.20295   |
| CE180                          | 0.99508  | 0.99508 | 0.99321 | ↓ | -0.0098355 | 0.8033  | 0.90799 | 1.0885  | ↑    | 0.12228    |
| TAG543-FA183                   | 0.054902 | 0.43372 | 0.80123 | ↓ | -0.31971   | 0.80832 | 0.91123 | #N/A    | #N/A |            |
| TAG546-FA181                   | 0.50776  | 0.84511 | 1.2896  | ↑ | 0.36696    | 0.81456 | 0.91215 | 0.92352 | ↓    | -0.11479   |
| TAG442-FA181                   | 0.39206  | 0.7769  | 1.1846  | ↑ | 0.24442    | 0.81474 | 0.91215 | 1.052   | ↑    | 0.073179   |
| FFA141                         | 0.25745  | 0.65998 | 0.86673 | ↓ | -0.20635   | 0.81691 | 0.91215 | 1.1933  | ↑    | 0.25502    |
| CE141                          | 0.58211  | 0.86994 | 0.92034 | ↓ | -0.11976   | 0.81772 | 0.91215 | 0.858   | ↓    | -0.22096   |
| TAG492-FA170                   | 0.79824  | 0.94763 | 0.868   | ↓ | -0.20423   | 0.82557 | 0.91762 | 0.90462 | ↓    | -0.14461   |
| CITRACONIC ACID_neg            | 0.18013  | 0.57997 | 1.3072  | ↑ | 0.38653    | 0.83375 | 0.91762 | 0.96854 | ↓    | -0.046109  |
| TAG481-FA141                   | 0.38348  | 0.76877 | 0.86498 | ↓ | -0.20926   | 0.83465 | 0.91762 | 1.0145  | ↑    | 0.020801   |
| TAG483-FA141                   | 0.26975  | 0.66919 | 0.85146 | ↓ | -0.23199   | 0.83585 | 0.91762 | 0.97642 | ↓    | -0.034432  |
| TAG422-FA182                   | 0.40259  | 0.77932 | 1.0994  | ↑ | 0.13675    | 0.84062 | 0.91762 | 1.1811  | ↑    | 0.24014    |

|                                      |           |         |         |   |           |         |         |         |   |           |
|--------------------------------------|-----------|---------|---------|---|-----------|---------|---------|---------|---|-----------|
| TAG534-FA170                         | 0.47618   | 0.82568 | 0.86791 | ↓ | -0.20438  | 0.8409  | 0.91762 | 0.93618 | ↓ | -0.095137 |
| INDOLEACRYLIC ACID_pos_1             | 0.42262   | 0.79475 | 1.2456  | ↑ | 0.31686   | 0.84221 | 0.91762 | 0.71994 | ↓ | -0.47405  |
| TAG545-FA180                         | 0.64909   | 0.90045 | 1.3713  | ↑ | 0.45555   | 0.84252 | 0.91762 | 0.8438  | ↓ | -0.24502  |
| TAG483-FA140                         | 0.7463    | 0.9384  | 1.047   | ↑ | 0.066266  | 0.84449 | 0.91762 | 1.0838  | ↑ | 0.11609   |
| TAG502-FA141                         | 0.38067   | 0.76877 | 1.0322  | ↑ | 0.04573   | 0.84474 | 0.91762 | 1.0553  | ↑ | 0.077621  |
| TAG483-FA182                         | 0.95053   | 0.98616 | 0.98316 | ↓ | -0.024499 | 0.84637 | 0.91762 | 0.96376 | ↓ | -0.053255 |
| N-GLYCYL-L-PROLINE_neg_3             | 0.45341   | 0.8244  | 0.94472 | ↓ | -0.082041 | 0.85827 | 0.92449 | 0.81145 | ↓ | -0.30142  |
| TAG544-FA224                         | 0.12254   | 0.54053 | 0.81506 | ↓ | -0.29503  | 0.85942 | 0.92449 | 0.95867 | ↓ | -0.060887 |
| TAG525-FA160                         | 0.82445   | 0.95998 | 1.3736  | ↑ | 0.45796   | 0.85997 | 0.92449 | 0.98816 | ↓ | -0.017177 |
| RIBOFLAVIN_pos_1                     | 0.41339   | 0.78434 | 1.0741  | ↑ | 0.1031    | 0.86141 | 0.92449 | 1.173   | ↑ | 0.23017   |
| METANEPHRINE_pos_1                   | 0.017648  | 0.31041 | 0.66907 | ↓ | -0.57978  | 0.86656 | 0.92767 | 1.0786  | ↑ | 0.10913   |
| XANTHURENIC ACID_pos_2               | 0.15476   | 0.56567 | 0.53441 | ↓ | -0.90397  | 0.8707  | 0.92977 | 0.92844 | ↓ | -0.10712  |
| TAG525-FA183                         | 0.46558   | 0.82447 | 1.2962  | ↑ | 0.37424   | 0.88199 | 0.93946 | 1.0576  | ↑ | 0.080828  |
| TAG531-FA170                         | 0.70568   | 0.91456 | 0.91366 | ↓ | -0.13027  | 0.88772 | 0.94188 | 0.97392 | ↓ | -0.038119 |
| FFA182                               | 0.49753   | 0.83908 | 0.93556 | ↓ | -0.096096 | 0.88869 | 0.94188 | 0.8759  | ↓ | -0.19116  |
| XANTHOSINE_neg_1                     | 0.57485   | 0.86994 | 1.1985  | ↑ | 0.26127   | 0.89488 | 0.94421 | 1.2451  | ↑ | 0.31631   |
| TAG504-FA161                         | 0.42209   | 0.79475 | 1.0322  | ↑ | 0.04579   | 0.89551 | 0.94421 | 1.0601  | ↑ | 0.084252  |
| TAG546-FA183                         | 0.57075   | 0.86994 | 1.3872  | ↑ | 0.47219   | 0.89798 | 0.94421 | 0.8979  | ↓ | -0.15537  |
| TAG481-FA120                         | 0.47672   | 0.82568 | 1.0917  | ↑ | 0.12653   | 0.89978 | 0.94421 | 1.0741  | ↑ | 0.10308   |
| TAG463-FA182                         | 0.18526   | 0.58323 | 1.1217  | ↑ | 0.16569   | 0.9053  | 0.94568 | 1.0156  | ↑ | 0.022275  |
| N-ACETYLPUTRESCINE_pos_1             | 0.19383   | 0.59695 | 0.69742 | ↓ | -0.51991  | 0.90563 | 0.94568 | 1.2942  | ↑ | 0.37207   |
| TAG587-FA182                         | 0.0087084 | 0.30971 | 1.5551  | ↑ | 0.63697   | 0.91122 | 0.94919 | 1.0224  | ↑ | 0.031983  |
| CE225                                | 0.69799   | 0.91456 | 1.0866  | ↑ | 0.11984   | 0.91506 | 0.95086 | 1.1123  | ↑ | 0.15357   |
| PYROPHOSPHATE_neg_3                  | 0.022643  | 0.31041 | 0.40345 | ↓ | -1.3095   | 0.91967 | 0.95329 | 1.4951  | ↑ | 0.58025   |
| TAG493-FA182                         | 0.83831   | 0.97251 | 0.94598 | ↓ | -0.080123 | 0.92189 | 0.95329 | 0.95878 | ↓ | -0.06073  |
| 2-PHOSPHOGLYCERATE_pos_4             | 0.91663   | 0.98112 | 0.94756 | ↓ | -0.077706 | 0.92599 | 0.9552  | 1.1011  | ↑ | 0.13892   |
| NORMETANEPHRINE_pos_1                | 0.54123   | 0.85194 | 1.0721  | ↑ | 0.10042   | 0.93482 | 0.96198 | 1.0322  | ↑ | 0.045779  |
| FFA225                               | 0.085045  | 0.4961  | 0.81424 | ↓ | -0.29648  | 0.94235 | 0.9662  | 1.0798  | ↑ | 0.11078   |
| TAG531-FA160                         | 0.16096   | 0.56567 | 0.70428 | ↓ | -0.50577  | 0.94347 | 0.9662  | 0.98068 | ↓ | -0.028144 |
| TAG547-FA182                         | 0.36611   | 0.76648 | 1.4154  | ↑ | 0.50119   | 0.94807 | 0.96858 | 0.81727 | ↓ | -0.29111  |
| DAG181/226                           | 0.15058   | 0.56567 | 0.7952  | ↓ | -0.3306   | 0.95211 | 0.97038 | 1.0357  | ↑ | 0.050639  |
| TAG547-FA183                         | 0.44299   | 0.81502 | 1.4076  | ↑ | 0.49324   | 0.96791 | 0.98412 | 0.84267 | ↓ | -0.24696  |
| TAG589-FA181                         | 0.47986   | 0.82568 | 1.0365  | ↑ | 0.05174   | 0.97387 | 0.98781 | 0.99269 | ↓ | -0.010578 |
| 2-HYDROXY-3-METHYLBUTYRIC ACID_neg_1 | 0.89784   | 0.97842 | 0.87792 | ↓ | -0.18783  | 0.98733 | 0.99881 | 0.86312 | ↓ | -0.21237  |
| IMIDAZOLE_pos_1                      | 0.95872   | 0.98616 | 0.89246 | ↓ | -0.16414  | 0.99114 | 0.99881 | 0.76898 | ↓ | -0.37899  |
| INDOLE-3-CARBOXYLIC ACID_pos_3       | 0.64397   | 0.90045 | 1.336   | ↑ | 0.41796   | 0.99571 | 0.99881 | 1.4863  | ↑ | 0.57175   |
| CE170                                | 0.073825  | 0.47539 | 0.69734 | ↓ | -0.52007  | 0.99689 | 0.99881 | 1.0935  | ↑ | 0.12892   |
| TAG504-FA181                         | 0.25189   | 0.65676 | 1.1136  | ↑ | 0.15519   | 0.99873 | 0.99881 | 1.0009  | ↑ | 0.0012678 |
| L-ORNITHINE_pos_1                    | 0.12934   | 0.5487  | 1.7142  | ↑ | 0.77756   | 0.99881 | 0.99881 | 1.0104  | ↑ | 0.014863  |
